# Supplementary material
Source: publisher site journal article supplement (https://www.dovepress.com/article/356988)

## Supporting Information

# Novel 2-(5-Aryl-4,5-dihydropyrazol-1-yl)thiazol-4-one as EGFR Inhibitors: Synthesis, Biological Assessment and Molecular Docking Insights

Tarfah Al-Warhi, Ahmed M. El Kerdawy, Mohamed A. Said, Amgad Albohy, Zainab M. Elsayed, Nada Aljaeed, Eslam B. Elkaeed, Wagdy M. Eldehna\*, Hatem A. Abdel-Aziz, Miral A. Abdelmoaz

### Tables of Contents

|    |                                                                                                 |       |
|----|-------------------------------------------------------------------------------------------------|-------|
| 1. | Anti-proliferative Activity Against Breast Cancer Cell Lines                                    | 2     |
| 2. | Cell Cycle Analysis                                                                             | 2     |
| 3. | AnnexinV-FITC/PI Apoptosis Assay                                                                | 3     |
| 4. | EGFR Kinase Inhibitory Activity                                                                 | 3     |
| 5. | Molecular Docking Study                                                                         | 4-5   |
| 6. | Characterisation of the key intermediate ( <b>5c</b> ) and the target compounds ( <b>7a-o</b> ) | 6     |
| 7. | Cells distribution of Cell cycle                                                                | 6-12  |
| 8. | NMR Spectra                                                                                     | 13-37 |
| 9. | Elemental analysis data                                                                         | 38    |

## 1. Anti-proliferative action toward cancer cell lines

The two examined lung cancer cell line A549 and the breast cancer cell line T-47D have been obtained from American Type Culture Collection (ATCC). Cells lines were maintained as monolayers in Dulbecco's Modified Eagle's Medium (DMEM) supplemented with 10% FBS, 2 mM L-glutamine, 100 U/ml penicillin and 100µg/ml streptomycin sulfate. Cells were sub-cultured with trypsin /EDTA solution, counted with haemocytometer and plated onto 96-well plates (5000 cells/well) and left overnight to form a semi-confluent monolayer. Cell monolayers were treated in quadrates with vehicle (DMSO, 0.1% v/v), test samples (thiazolyl-pyrazolines **7a-o**) or Staurosporine as positive control for an exposure time of 48 h. At the end of exposure, MTT solution in PBS (5 mg/ml) was then added to all well including no cell blank and left to incubate for 90 min. The formation of formazan crystals were visually confirmed using phase contract microscopy. DMSO (100 µl/well) was added to dissolve the formazan crystals with shaking for 10 min after which the absorbance was read at 590 nm against no cell blanks on a FLuo Star Optima microplate reader (BMG technologies, Germany). Cell proliferation was calculated comparing the OD values of the DMSO control wells and those of the samples represented as % proliferation to the control. Dose-response experiment was performed on samples producing > or =50% loss of cell proliferation using five serial 2-fold dilutions (50, 25, 12.5, 6.25 and 3.125 µM) of the sample. IC<sub>50</sub> values (concentration of sample causing 50% loss of cell proliferation of the vehicle control) were calculated using non-linear regression curve fitting of the dose response plots on GraphPad Prism V.6.0 software.

## 2. Cell Cycle Analysis

Breast cancer T-47D cells were treated with thiazolyl-pyrazolines **7g** and **7m** for 24 h (at their IC<sub>50</sub> concentration), and then cells were washed twice with ice-cold phosphate buffered saline (PBS). Subsequently, the treated cells were collected by centrifugation, fixed in ice-cold 70% (v/v) ethanol, washed with PBS, re-suspended with 100 µg/mL RNase, stained with 40 µg/mL PI, and analyzed by flow cytometry using FACS Calibur (Becton Dickinson, BD, Franklin Lakes, NJ, USA). The cell cycle distributions were calculated using CellQuest software 5.1 (Becton Dickinson).

### 3. Annexin V-FITC Apoptosis Assay

Phosphatidylserine externalization was assayed using Annexin V-FITC/PI apoptosis detection kit (BD Biosciences, USA) according to the manufacturer's instructions. Breast cancer T-47D cells were cultured to a monolayer then treated with thiazolyl-pyrazolines **7g** and **7m** at their  $IC_{50}$  concentration. Briefly, cells were then harvested *via* trypsinization, and rinsed twice in PBS followed by binding buffer. Moreover, cells were re-suspended in 100  $\mu$ L of binding buffer with the addition of 1  $\mu$ L of FITC-Annexin V followed by an incubation period of 30 min at 4 °C. Cells were then rinsed in binding buffer and resuspended in 150  $\mu$ L of binding buffer with the addition of 1  $\mu$ L of DAPI (1  $\mu$ g/ $\mu$ L in PBS). Cells were then analyzed using the flow cytometer BD FACS Canto II and the results were interpreted with FlowJo7.6.4 software (Tree Star, Ashland, OR, USA).

### 4. EGFR Kinase Inhibitory Activity

Thiazolyl-pyrazolines **7b**, **7g**, **7l** and **7m** were tested *in vitro* for inhibition of EGFR tyrosine kinase using ADP-Glo™ Kinase Assay (Promega, Catalogue No. V3831) which is a luminescent kinase assay that measures ADP formed from a kinase reaction. ADP is converted into ATP which is converted into light by Ultra-Glo™ Luciferase. The luminescent signal positively correlates with ADP amount and kinase activity.

Protocol: first dilute enzyme, substrate, ATP and inhibitors in Tyrosine Kinase Buffer (40 mM Tris, 7.5; 20 mM  $MgCl_2$ ; 0.1 mg/ml BSA (bovine serum albumin); 2 mM  $MnCl_2$ ; 50 $\mu$ M DTT), then add to the wells of 384 low volume plate: 1  $\mu$ L of inhibitor or (5% DMSO), 2  $\mu$ L of enzyme and 2  $\mu$ L of substrate/ATP mix. Incubate at room temperature for 60 minutes, add 5  $\mu$ L of ADP-Glo™ Reagent, incubate at room temperature for 40 minutes, add 10  $\mu$ L of Kinase Detection reagent, incubate at room temperature for 30 minutes and finally record luminescence (Integration time 0.5-1second).

## 6. Molecular Docking Study

All the molecular modeling studies were carried out using Molecular Operating Environment (MOE, 2020.0901) software. All minimizations were performed with MOE until an RMSD gradient of 0.05 kcal·mol<sup>-1</sup>·Å<sup>-1</sup> with MMFF94x force field and the partial charges were automatically calculated. The X-ray crystallographic structure of Epidermal Growth Factor Receptor (EGFR) co-crystallized with the 4-anilinoquinazoline inhibitor Erlotinib (PDB ID: 1M17) was downloaded from the protein data bank. Water molecules and ligands that are not involved in binding were removed. Then, the protein was prepared for docking study using *Protonate 3D* protocol in MOE with default options. The co-crystallized ligand was used to define the binding site for docking. Triangle Matcher placement method and London dG scoring function were used for docking. Docking setup was first validated by self-docking of the co-crystallized ligand (Erlotinib) in the vicinity of the binding site of the enzyme with energy score (S) = -10.86 kcal/mol and RMSD of 1.46 Å. The ability of the docking protocol to reproduce all the key interactions accomplished by the co-crystallized ligand (Erlotinib) with the key amino acids in the binding site indicated the suitability of the adopted docking protocol for the intended docking study. These interactions include H-bonding with Met769, through water mediated H-bonding with Thr766 and cation-π interaction with Lys721 (Figure S1 and S2). The validated setup was then used for predicting the ligand-target interactions of the compounds of interest.

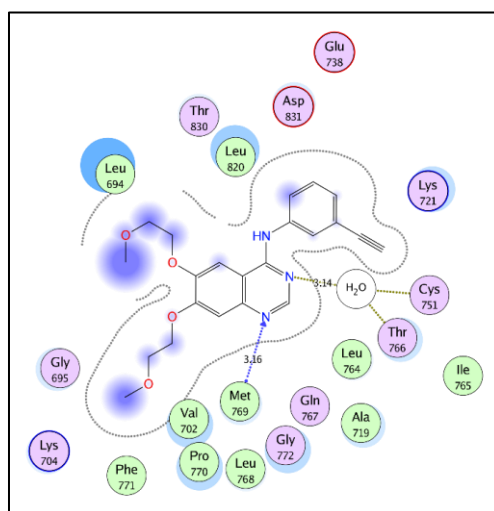

**Figure S1.** 2D interaction diagram showing Erlotinib docking pose interactions with the key amino acids in the EGFR binding site.

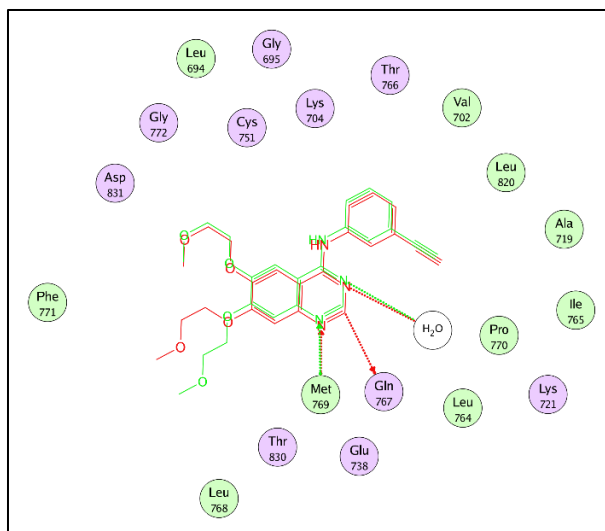

(A)

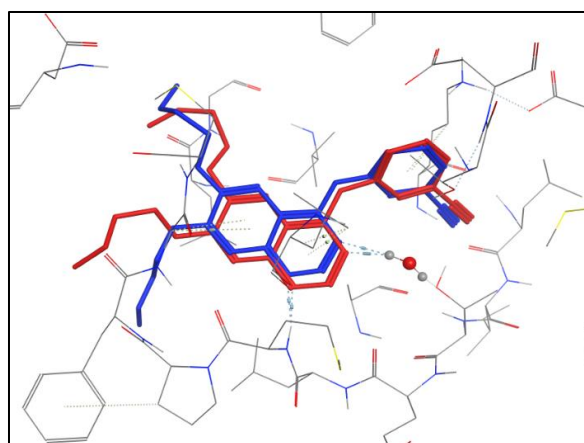

(B)

**Figure S2.** **A)** 2D representation and **B)** 3D representation of the superimposition of the co-crystallized (red) and the docking pose (blue) of Erlotinib in the EGFR binding site with RMSD of 1.46Å. (Ligand Hydrogen atoms were removed for clarity)

## 6. Cells distribution of Cell cycle

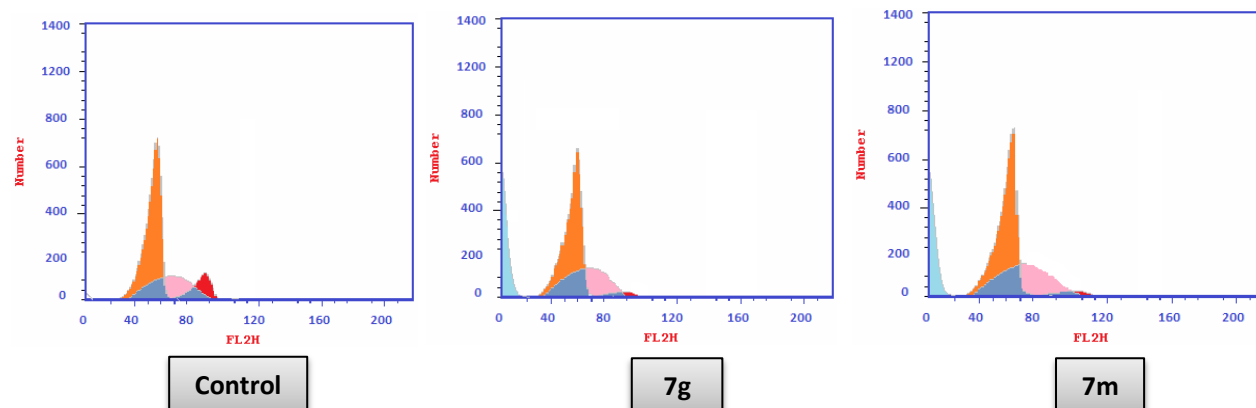

**Figure S3.** Effect of thiazolyl pyrazolines **7g** and **7m** on the phases of cell cycle of T-47D cells

## 7. Characterisation of the key intermediate (**5c**) and the target compounds (**7a-o**)

### 2-(5-(4-Fluorophenyl)-3-(thiophen-2-yl)-4,5-dihydro-1H-pyrazol-1-yl)thiazol-4(5H)-one **5c**

White crystals (yield 89%), m.p. 191-193 °C;  $^1\text{H NMR}$   $\delta$  ppm: 3.40 (dd, 1H,  $\text{H}_\text{A}$  of pyrazoline methylene C-4 protons,  $J = 3.6$  Hz, 18.0 Hz), 3.90 (s, 2H,  $\text{CH}_2$  of thiazolidenone moiety), 4.11 (dd, 1H,  $\text{H}_\text{B}$  of pyrazoline methylene C-4 protons,  $J = 4.8$  Hz, 18.0 Hz), 5.87 (dd, 1H,  $\text{H}_\text{X}$  of pyrazoline C-5 proton,  $J = 3.6$  Hz, 10.8 Hz), 7.14-7.18 (m, 3H, Aromatic protons), 7.28-7.30 (m, 2H, Aromatic protons), 7.58 (s, 1H, Aromatic protons), 7.80-7.84 (m, 1H, Aromatic protons);  $^{13}\text{C NMR}$   $\delta$  ppm: 44.47, 60.53, 63.58, 116.32, 128.33, 128.97, 132.19, 132.91, 133.07, 136.85, 156.56, 175.36, 177.64, 187.39; Anal. Calcd. for  $\text{C}_{16}\text{H}_{12}\text{FN}_3\text{OS}_2$ : C, 55.64; H, 3.50; N, 12.17; found C, 55.81; H, 3.48; N, 12.22;

### 5-Benzylidene-2-(5-(4-fluorophenyl)-3-(p-tolyl)-4,5-dihydro-1H-pyrazol-1-yl)thiazol-4(5H)-one (**7a**).

White crystals (yield 85%), m.p. 247-249 °C; IR (KBr,  $\nu$   $\text{cm}^{-1}$ ) 1707 (C=O);  $^1\text{H NMR}$   $\delta$  ppm: 2.39 (s, 3H,  $\text{CH}_3$ ), 3.46 (dd, 1H,  $\text{H}_\text{A}$  of pyrazoline methylene C-4 protons,  $J = 4.4$  Hz, 18.4 Hz), 4.12 (dd, 1H,  $\text{H}_\text{B}$  of pyrazoline methylene C-4 protons,  $J = 11.2$  Hz, 18.4 Hz), 5.90 (dd, 1H,  $\text{H}_\text{X}$  of pyrazoline C-5 proton,  $J = 4.4$

Hz, 11.2 Hz), 7.20-7.24 (m, 2H, Aromatic protons), 7.33-7.37 (m, 4H, Aromatic protons), 7.45 (t, 1H, Aromatic protons,  $J = 7.2$  Hz), 7.53-7.57 (m, 2H, Aromatic protons), 7.65-7.67 (m, 3H, Aromatic protons), 7.79 (d, 2H, Aromatic protons,  $J = 8.0$  Hz);  $^{13}\text{C}$  NMR  $\delta$  ppm: 21.63 (CH<sub>3</sub>), 43.98 (CH<sub>2</sub>), 63.51 (CH), 116.14, 116.35, 127.21, 128.00, 128.43, 128.53, 128.61, 129.76, 130.08, 130.14, 130.41, 131.42, 134.28, 136.70, 136.73, 142.57, 160.94, 162.01, 163.37 (Aromatic carbons), 170.73 (C=O); Anal. Calcd. for C<sub>26</sub>H<sub>20</sub>FN<sub>3</sub>OS: C, 70.73; H, 4.57; N, 9.52; found C, 70.91; H, 4.53; N, 9.56.

**2-(5-(4-Fluorophenyl)-3-(p-tolyl)-4,5-dihydro-1H-pyrazol-1-yl)-5-(4-hydroxybenzylidene)thiazol-4(5H)-one (7b).**

White crystals (yield 78%), m.p. > 300 °C; IR (KBr,  $\nu$  cm<sup>-1</sup>) 3215 (OH) and 1701 (C=O);  $^1\text{H}$  NMR  $\delta$  ppm: 2.37 (s, 3H, CH<sub>3</sub>), 3.43 (dd, 1H, H<sub>A</sub> of pyrazoline methylene C-4 protons,  $J = 4.0$  Hz, 18.4 Hz), 4.10 (dd, 1H, H<sub>B</sub> of pyrazoline methylene C-4 protons,  $J = 11.2$  Hz, 18.4 Hz), 5.87 (dd, 1H, H<sub>X</sub> of pyrazoline C-5 proton,  $J = 4.0$  Hz, 11.2 Hz), 6.92-6.96 (m, 2H, Aromatic protons), 7.18-7.24 (m, 2H, Aromatic protons), 7.30-7.36 (m, 4H, Aromatic protons), 7.50 (d, 2H, Aromatic protons,  $J = 8.0$  Hz), 7.56 (s, 1H, Aromatic protons), 7.78 (d, 2H, Aromatic protons,  $J = 8.0$  Hz), 10.10 (s, 1H, OH);  $^{13}\text{C}$  NMR  $\delta$  ppm: 21.63 (CH<sub>3</sub>), 43.94 (CH<sub>2</sub>), 63.39 (CH), 116.12, 116.33, 116.74, 124.28, 125.16, 127.33, 127.94, 128.49, 128.57, 130.06, 131.95, 132.37, 136.86, 136.89, 142.41, 159.90, 160.91, 161.45, 163.34 (Aromatic carbons), 170.66 (C=O); Anal. Calcd. for C<sub>26</sub>H<sub>20</sub>FN<sub>3</sub>O<sub>2</sub>S: C, 68.26; H, 4.41; N, 9.18; found C, 68.07; H, 4.44; N, 9.14.

**2-(5-(4-Fluorophenyl)-3-(p-tolyl)-4,5-dihydro-1H-pyrazol-1-yl)-5-(4-methoxybenzylidene)thiazol-4(5H)-one (7c).**

White crystals (yield 82%), m.p. 189-200 °C; IR (KBr,  $\nu$  cm<sup>-1</sup>) 1705 (C=O);  $^1\text{H}$  NMR  $\delta$  ppm: 2.38 (s, 3H, CH<sub>3</sub>), 3.43 (dd, 1H, H<sub>A</sub> of pyrazoline methylene C-4 protons,  $J = 4.4$  Hz, 18.4 Hz), 3.82 (s, 3H, OCH<sub>3</sub>), 4.09 (dd, 1H, H<sub>B</sub> of pyrazoline methylene C-4 protons,  $J = 11.2$  Hz, 18.4 Hz), 5.86 (dd, 1H, H<sub>X</sub> of pyrazoline C-5 proton,  $J = 4.0$  Hz, 11.2 Hz), 7.08 (d, 2H, Aromatic protons,  $J = 8.8$  Hz), 7.19-7.24 (m, 2H, Aromatic protons), 7.31-7.35 (m, 4H, Aromatic protons), 7.58-7.62 (m, 3H, Aromatic protons), 7.77 (d, 2H, Aromatic protons,  $J = 8.8$  Hz);  $^{13}\text{C}$  NMR  $\delta$  ppm: 21.60 (CH<sub>3</sub>), 43.93 (CH<sub>2</sub>), 55.84 (OCH<sub>3</sub>), 63.41 (CH), 115.25, 115.30, 116.11, 116.32, 125.48, 126.70, 127.23, 127.89, 127.94, 128.47, 128.55, 130.04, 131.45, 132.06, 136.76, 136.79,

142.46, 160.92, 161.05, 161.52, 161.63, 163.35 (Aromatic carbons), 170.66 (C=O); Anal. Calcd. for C<sub>27</sub>H<sub>22</sub>FN<sub>3</sub>O<sub>2</sub>S: C, 68.77; H, 4.70; N, 8.91; found C, 68.67; H, 4.75; N, 8.95.

**5-(4-(Dimethylamino)benzylidene)-2-(5-(4-fluorophenyl)-3-(p-tolyl)-4,5-dihydro-1H-pyrazol-1-yl)thiazol-4(5H)-one (7d).**

White crystals (yield 84%), m.p. 285-287 °C; IR (KBr,  $\nu$  cm<sup>-1</sup>) 1717 (C=O); <sup>1</sup>H NMR  $\delta$  ppm: 2.39 (s, 3H, CH<sub>3</sub>), 3.01 (s, 6H, N(CH<sub>3</sub>)<sub>2</sub>), 3.42 (dd, 1H, H<sub>A</sub> of pyrazoline methylene C-4 protons,  $J$ = 4.4 Hz, 18.8 Hz), 4.09 (dd, 1H, H<sub>B</sub> of pyrazoline methylene C-4 protons,  $J$ = 11.2 Hz, 18.4 Hz), 5.86 (dd, 1H, H<sub>X</sub> of pyrazoline C-5 proton,  $J$ = 4.4 Hz, 11.2 Hz), 6.82 (d, 2H, Aromatic protons,  $J$ = 8.0 Hz), 7.19-7.24 (m, 2H, Aromatic protons), 7.31-7.37 (m, 4H, Aromatic protons), 7.47 (d, 2H, Aromatic protons,  $J$ = 8.4 Hz), 7.53 (s, 1H, Aromatic protons), 7.78 (d, 2H, Aromatic protons,  $J$ = 8.0 Hz); Anal. Calcd. for C<sub>28</sub>H<sub>25</sub>FN<sub>4</sub>OS: C, 69.40; H, 5.20; N, 11.56; found C, 69.31; H, 5.16; N, 11.53.

**5-(4-Chlorobenzylidene)-2-(5-(4-fluorophenyl)-3-(p-tolyl)-4,5-dihydro-1H-pyrazol-1-yl)thiazol-4(5H)-one (7e).**

White crystals (yield 80%), m.p. 256-258 °C; IR (KBr,  $\nu$  cm<sup>-1</sup>) 1709 (C=O); <sup>1</sup>H NMR  $\delta$  ppm: 2.40 (s, 3H, CH<sub>3</sub>), 3.48 (dd, 1H, H<sub>A</sub> of pyrazoline methylene C-4 protons,  $J$ = 4.4 Hz, 18.4 Hz), 4.13 (dd, 1H, H<sub>B</sub> of pyrazoline methylene C-4 protons,  $J$ = 11.6 Hz, 18.4 Hz), 5.90 (dd, 1H, H<sub>X</sub> of pyrazoline C-5 proton,  $J$ = 4.4 Hz, 11.2 Hz), 7.20-7.25 (m, 2H, Aromatic protons), 7.31-7.38 (m, 4H, Aromatic protons), 7.59-7.65 (m, 3H, Aromatic protons), 7.67-7.72 (m, 2H, Aromatic protons), 7.79 (d, 2H, Aromatic protons,  $J$ = 8.8 Hz); MS  $m/z$  [%]: 475.93 [M<sup>+</sup>, 60.89], 271.20 [100]; Anal. Calcd. for C<sub>26</sub>H<sub>19</sub>ClFN<sub>3</sub>OS: C, 65.61; H, 4.02; N, 8.83; found C, 65.83; H, 4.07; N, 8.75.

**5-Benzylidene-2-(5-(4-fluorophenyl)-3-(4-methoxyphenyl)-4,5-dihydro-1H-pyrazol-1-yl)thiazol-4(5H)-one (7f).**

White crystals (yield 88%), m.p. 236-238 °C; IR (KBr,  $\nu$  cm<sup>-1</sup>) 1705 (C=O); <sup>1</sup>H NMR  $\delta$  ppm: 3.42 (dd, 1H, H<sub>A</sub> of pyrazoline methylene C-4 protons,  $J$ = 4.0 Hz, 18.0 Hz), 3.82 (2s, 3H, OCH<sub>3</sub>), 4.07 (dd, 1H, H<sub>B</sub> of pyrazoline methylene C-4 protons,  $J$ = 11.2 Hz, 18.0 Hz), 5.85 (dd, 1H, H<sub>X</sub> of pyrazoline C-5 proton,  $J$ = 4.4 Hz, 11.2 Hz), 7.06-7.10 (m, 3H, Aromatic protons), 7.18-7.23 (m, 3H, Aromatic protons), 7.31-7.34 (m, 3H,



Aromatic protons), 7.58-7.60 (m, 3H, Aromatic protons), 7.81 (d, 2H, Aromatic protons,  $J = 8.8$  Hz); Anal. Calcd. for  $C_{26}H_{20}FN_3O_2S$ : C, 68.26; H, 4.41; N, 9.18; found C, 68.15; H, 4.38; N, 9.15.

***2-(5-(4-Fluorophenyl)-3-(4-methoxyphenyl)-4,5-dihydro-1H-pyrazol-1-yl)-5-(4-hydroxybenzylidene)thiazol-4(5H)-one (7g) 7f.***

White crystals (yield 90%), m.p. > 300 °C; IR (KBr,  $\nu$   $cm^{-1}$ ) 3210 (OH) and 1702 (C=O);  $^1H$  NMR  $\delta$  ppm: 3.41 (dd, 1H,  $H_A$  of pyrazoline methylene C-4 protons,  $J = 4.0$  Hz, 17.6 Hz), 3.83 (s, 3H,  $OCH_3$ ), 4.06 (dd, 1H,  $H_B$  of pyrazoline methylene C-4 protons,  $J = 11.6$  Hz, 18.8 Hz), 5.85 (dd, 1H,  $H_X$  of pyrazoline C-5 proton,  $J = 4.0$  Hz, 11.2 Hz), 6.93 (d, 2H, Aromatic protons,  $J = 8.8$  Hz), 7.05 (d, 2H, Aromatic protons,  $J = 8.8$  Hz), 7.18-7.22 (m, 2H, Aromatic protons), 7.31-7.34 (m, 2H, Aromatic protons), 7.50 (d, 2H, Aromatic protons,  $J = 8.4$  Hz), 7.56 (s, 1H, Aromatic protons), 7.81 (d, 2H, Aromatic protons,  $J = 8.8$  Hz), 10.21 (s, 1H, OH); Anal. Calcd. for  $C_{26}H_{20}FN_3O_3S$ : C, 65.95; H, 4.26; N, 8.87; found C, 66.13; H, 4.21; N, 8.83.

***2-(5-(4-Fluorophenyl)-3-(4-methoxyphenyl)-4,5-dihydro-1H-pyrazol-1-yl)-5-(4-methoxybenzylidene)thiazol-4(5H)-one (7h).***

White crystals (yield 83%), m.p. 221-223 °C; IR (KBr,  $\nu$   $cm^{-1}$ ) 1711 (C=O);  $^1H$  NMR  $\delta$  ppm: 3.42 (dd, 1H,  $H_A$  of pyrazoline methylene C-4 protons,  $J = 4.0$  Hz, 18.0 Hz), 3.82, 3.83 (2s, 6H, 2 ( $OCH_3$ )), 4.07 (dd, 1H,  $H_B$  of pyrazoline methylene C-4 protons,  $J = 11.2$  Hz, 18.0 Hz), 5.85 (dd, 1H,  $H_X$  of pyrazoline C-5 proton,  $J = 4.4$  Hz, 11.2 Hz), 7.06-7.10 (m, 4H, Aromatic protons), 7.18-7.23 (m, 2H, Aromatic protons), 7.31-7.34 (m, 2H, Aromatic protons), 7.58-7.60 (m, 3H, Aromatic protons), 7.81 (d, 2H, Aromatic protons,  $J = 8.8$  Hz); Anal. Calcd. for  $C_{27}H_{22}FN_3O_3S$ : C, 66.52; H, 4.55; N, 8.62; found C, 66.74; H, 4.52; N, 8.66.

***5-(4-(Dimethylamino)benzylidene)-2-(5-(4-fluorophenyl)-3-(4-methoxyphenyl)-4,5-dihydro-1H-pyrazol-1-yl)thiazol-4(5H)-one (7i).***

White crystals (yield 90%), m.p. 283-285 °C; IR (KBr,  $\nu$   $cm^{-1}$ ) 1710 (C=O);  $^1H$  NMR  $\delta$  ppm: 2.99 (s, 6H,  $N(CH_3)_2$ ), 3.44 (dd, 1H,  $H_A$  of pyrazoline methylene C-4 protons,  $J = 4.4$  Hz, 18.0 Hz), 3.83 (s, 3H,  $OCH_3$ ), 4.05 (dd, 1H,  $H_B$  of pyrazoline methylene C-4 protons,  $J = 10.8$  Hz, 18.0 Hz), 5.83 (dd, 1H,  $H_X$  of pyrazoline C-5 proton,  $J = 4.4$  Hz, 11.2 Hz), 6.79 (d, 2H, Aromatic protons,  $J = 8.8$  Hz), 7.05 (d, 2H, Aromatic protons,  $J = 8.8$  Hz), 7.18-7.23 (m, 2H, Aromatic protons), 7.30-7.34 (m, 2H, Aromatic protons), 7.45 (d, 2H, Aromatic

protons,  $J = 8.8$  Hz), 7.52 (s, 1H, Aromatic protons), 7.81 (d, 2H, Aromatic protons,  $J = 8.8$  Hz);  $^{13}\text{C}$  NMR  $\delta$  ppm: 43.94 ( $\text{CH}_2$ ), 56.52( $\text{N}(\text{CH}_3)_2$ ), 59.73 ( $\text{OCH}_3$ ), 67.46 (CH), 112.58, 114.96, 116.33, 121.14, 121.64, 122.57, 124.47, 125.62, 127.67, 128.43, 129.78, 132.07, 134.13, 135.43, 135.79, 137.30, 140.27, 151.65, 160.82 (Aromatic carbons), 170.15 ( $\text{C}=\text{O}$ ); Anal. Calcd. for  $\text{C}_{28}\text{H}_{25}\text{FN}_4\text{O}_2\text{S}$ : C, 67.18; H, 5.03; N, 11.19; found C, 67.08; H, 5.09; N, 11.12.

**5-(4-Chlorobenzylidene)-2-(5-(4-fluorophenyl)-3-(4-methoxyphenyl)-4,5-dihydro-1H-pyrazol-1-yl)thiazol-4(5H)-one (7j).**

White crystals (yield 80%), m.p. 240-243 °C; IR (KBr,  $\nu$   $\text{cm}^{-1}$ ) 1712 ( $\text{C}=\text{O}$ );  $^1\text{H}$  NMR  $\delta$  ppm: 3.46 (dd, 1H,  $\text{H}_\text{A}$  of pyrazoline methylene C-4 protons,  $J = 4.0$  Hz, 18.0 Hz), 3.84 (s, 3H,  $\text{OCH}_3$ ), 4.10 (dd, 1H,  $\text{H}_\text{B}$  of pyrazoline methylene C-4 protons,  $J = 11.2$  Hz, 18.4 Hz), 5.88 (dd, 1H,  $\text{H}_\text{X}$  of pyrazoline C-5 proton,  $J = 4.0$  Hz, 11.2 Hz), 7.08 (d, 2H, Aromatic protons,  $J = 8.8$  Hz), 7.19-7.23 (m, 2H, Aromatic protons), 7.32-7.35 (m, 2H, Aromatic protons), 7.58-7.62 (m, 3H, Aromatic protons), 7.65 (d, 2H,  $J = 8.8$  Hz), 7.83 (d, 2H,  $J = 8.8$  Hz);  $^{13}\text{C}$  NMR  $\delta$  ppm: 44.00 ( $\text{CH}_2$ ), 55.99 ( $\text{OCH}_3$ ), 63.52 (CH), 114.95, 116.13, 116.35, 122.33, 128.52, 128.60, 129.27, 129.76, 129.84, 129.91, 131.75, 133.24, 134.83, 136.68, 136.71, 160.94, 161.84, 162.64, 163.37 (Aromatic carbons), 170.13 ( $\text{C}=\text{O}$ ); MS  $m/z$  [%]: 392.97 [ $\text{M}^+$ , 21.59], 391.98 [100]; Anal. Calcd. for  $\text{C}_{26}\text{H}_{19}\text{ClFN}_3\text{O}_2\text{S}$ : C, 63.48; H, 3.89; N, 8.54; found C, 63.21; H, 3.82; N, 8.60.

**5-Benzylidene-2-(5-(4-fluorophenyl)-3-(thiophen-2-yl)-4,5-dihydro-1H-pyrazol-1-yl)thiazol-4(5H)-one (7k).**

White crystals (yield 84%), m.p. 266-268 °C; IR (KBr,  $\nu$   $\text{cm}^{-1}$ ) 1709 ( $\text{C}=\text{O}$ );  $^1\text{H}$  NMR  $\delta$  ppm: 3.41 (dd, 1H,  $\text{H}_\text{A}$  of pyrazoline methylene C-4 protons,  $J = 4.4$  Hz, 18.0 Hz), 4.14 (dd, 1H,  $\text{H}_\text{B}$  of pyrazoline methylene C-4 protons,  $J = 11.2$  Hz, 18.0 Hz), 5.91 (dd, 1H,  $\text{H}_\text{X}$  of pyrazoline C-5 proton,  $J = 4.4$  Hz, 11.2 Hz), 7.20-7.25 (m, 3H, Aromatic protons), 7.34-7.37 (m, 2H, Aromatic protons), 7.42-7.56 (m, 4H, Aromatic protons), 7.61-7.67 (m, 3H, Aromatic protons), 7.90-7.93 (m, 1H, Aromatic protons);  $^{13}\text{C}$  NMR  $\delta$  ppm: 44.54 ( $\text{CH}_2$ ), 63.68 (CH), 116.18, 116.39, 128.35, 128.51, 128.60, 129.02, 129.79, 130.14, 130.43, 131.56, 132.58, 132.68, 133.54, 134.25, 136.54, 157.47, 160.97 (Aromatic carbons), 170.42 ( $\text{C}=\text{O}$ ); Anal. Calcd. for  $\text{C}_{23}\text{H}_{16}\text{FN}_3\text{OS}_2$ : C, 63.72; H, 3.72; N, 9.69; found C, 63.64; H, 3.76; N, 9.65.

**2-(5-(4-Fluorophenyl)-3-(thiophen-2-yl)-4,5-dihydro-1H-pyrazol-1-yl)-5-(4-hydroxybenzylidene)thiazol-4(5H)-one (7l).**

White crystals (yield 79%), m.p. 218-220 °C; IR (KBr,  $\nu$   $\text{cm}^{-1}$ ) 3224 (OH) and 1714 (C=O);  $^1\text{H}$  NMR  $\delta$  ppm: 3.47 (dd, 1H,  $\text{H}_\text{A}$  of pyrazoline methylene C-4 protons,  $J$ = 4.0 Hz, 18.0 Hz), 4.14 (dd, 1H,  $\text{H}_\text{B}$  of pyrazoline methylene C-4 protons,  $J$ = 11.2 Hz, 18.0 Hz), 5.90 (dd, 1H,  $\text{H}_\text{X}$  of pyrazoline C-5 proton,  $J$ = 4.0 Hz, 11.2 Hz), 6.93 (d, 2H, Aromatic protons,  $J$ = 8.0 Hz), 7.19-7.25 (m, 3H, Aromatic protons), 7.31-7.36 (m, 2H, Aromatic protons), 7.48 (d, 2H, Aromatic protons,  $J$ = 8.0 Hz), 7.57 (s, 1H, Aromatic protons), 7.65 (d, 1H, Aromatic protons,  $J$ = 8.4 Hz), 7.91 (d, 1H, Aromatic protons,  $J$ = 8.0 Hz), 10.15 (s, 1H, OH);  $^{13}\text{C}$  NMR  $\delta$  ppm: 44.50 ( $\text{CH}_2$ ), 63.56 (CH), 116.16, 116.38, 116.82, 124.04, 124.99, 128.46, 128.55, 128.99, 132.16, 132.40, 132.80, 133.36, 136.71, 156.98, 160.12, 160.94 (Aromatic carbons), 170.32 (C=O); Anal. Calcd. for  $\text{C}_{23}\text{H}_{16}\text{FN}_3\text{O}_2\text{S}_2$ : C, 61.46; H, 3.59; N, 9.35; found C, 61.68; H, 3.62; N, 9.32.

**2-(5-(4-Fluorophenyl)-3-(thiophen-2-yl)-4,5-dihydro-1H-pyrazol-1-yl)-5-(4-methoxybenzylidene)thiazol-4(5H)-one (7m).**

White crystals (yield 82%), m.p. 260-262 °C; IR (KBr,  $\nu$   $\text{cm}^{-1}$ ) 1700 (C=O);  $^1\text{H}$  NMR  $\delta$  ppm: 3.48 (dd, 1H,  $\text{H}_\text{A}$  of pyrazoline methylene C-4 protons,  $J$ = 4.0 Hz, 18.0 Hz), 3.83 (s, 3H,  $\text{OCH}_3$ ), 4.14 (dd, 1H,  $\text{H}_\text{B}$  of pyrazoline methylene C-4 protons,  $J$ = 11.2 Hz, 18.4 Hz), 5.90 (dd, 1H,  $\text{H}_\text{X}$  of pyrazoline C-5 proton,  $J$ = 4.0 Hz, 11.2 Hz), 7.10 (d, 2H, Aromatic protons,  $J$ = 7.2 Hz), 7.20-7.25 (m, 3H, Aromatic protons), 7.32-7.36 (m, 2H, Aromatic protons), 7.59-7.66 (m, 4H, Aromatic protons), 7.91 (d, 1H, Aromatic protons,  $J$ = 5.2 Hz); Anal. Calcd. for  $\text{C}_{24}\text{H}_{18}\text{FN}_3\text{O}_2\text{S}_2$ : C, 62.19; H, 3.91; N, 9.07; found C, 61.96; H, 3.96; N, 9.03.

**5-(4-(Dimethylamino)benzylidene)-2-(5-(4-fluorophenyl)-3-(thiophen-2-yl)-4,5-dihydro-1H-pyrazol-1-yl)thiazol-4(5H)-one (7n).**

White crystals (yield 80%), m.p. 281-283 °C; IR (KBr,  $\nu$   $\text{cm}^{-1}$ ) 1700 (C=O);  $^1\text{H}$  NMR  $\delta$  ppm: 3.01 (s, 6H,  $\text{N}(\text{CH}_3)_2$ ), 3.46 (dd, 1H,  $\text{H}_\text{A}$  of pyrazoline methylene C-4 protons,  $J$ = 4.0 Hz, 18.0 Hz), 4.08 (dd, 1H,  $\text{H}_\text{B}$  of pyrazoline methylene C-4 protons,  $J$ = 11.2 Hz, 18.4 Hz), 5.89 (dd, 1H,  $\text{H}_\text{X}$  of pyrazoline C-5 proton,  $J$ = 4.0 Hz, 11.2 Hz), 6.83-6.78 (m, 2H, Aromatic protons), 7.18-7.25 (m, 3H, Aromatic protons), 7.32-7.37 (m, 2H, Aromatic protons), 7.46-7.49 (m, 2H, Aromatic protons), 7.54 (s, 1H, Aromatic protons), 7.64-7.66 (m, 1H,

Aromatic protons), 7.87-7.92 (m, 1H, Aromatic protons); Anal. Calcd. for C<sub>25</sub>H<sub>21</sub>FN<sub>4</sub>OS<sub>2</sub>: C, 63.01; H, 4.44; N, 11.76; found C, 62.83; H, 4.40; N, 11.72.

**5-(4-Chlorobenzylidene)-2-(5-(4-fluorophenyl)-3-(thiophen-2-yl)-4,5-dihydro-1H-pyrazol-1-yl)thiazol-4(5H)-one (7o).**

White crystals (yield 87%), m.p. 264-266 °C; IR (KBr,  $\nu$  cm<sup>-1</sup>) 1701 (C=O); <sup>1</sup>H NMR  $\delta$  ppm: 3.50 (dd, 1H, H<sub>A</sub> of pyrazoline methylene C-4 protons,  $J$ = 4.0 Hz, 18.0 Hz), 4.16 (dd, 1H, H<sub>B</sub> of pyrazoline methylene C-4 protons,  $J$ = 11.2 Hz, 18.4 Hz), 5.92 (dd, 1H, H<sub>X</sub> of pyrazoline C-5 proton,  $J$ = 4.4 Hz, 11.2 Hz), 7.20-7.26 (m, 3H, Aromatic protons), 7.33-7.37 (m, 2H, Aromatic protons), 7.60-7.63 (m, 3H, Aromatic protons), 7.67-7.69 (m, 3H, Aromatic protons), 7.93 (d, 1H,  $J$ = 5.2 Hz); <sup>13</sup>C NMR  $\delta$  ppm: 44.47 (CH<sub>2</sub>), 63.73 (CH), 116.19, 116.41, 128.18, 128.52, 128.60, 129.11, 129.86, 130.22, 131.81, 132.69, 133.18, 133.66, 134.93, 135.25, 136.48, 143.17, 155.28, 157.68, 158.44, 164.76 (Aromatic carbons), 170.15 (C=O); MS  $m/z$  [%]: 491.69 [M<sup>+</sup>, 21.23]; Anal. Calcd. for C<sub>23</sub>H<sub>15</sub>ClFN<sub>3</sub>OS<sub>2</sub>: C, 59.03; H, 3.23; N, 8.98; found C, 58.85; H, 3.22; N, 9.06.

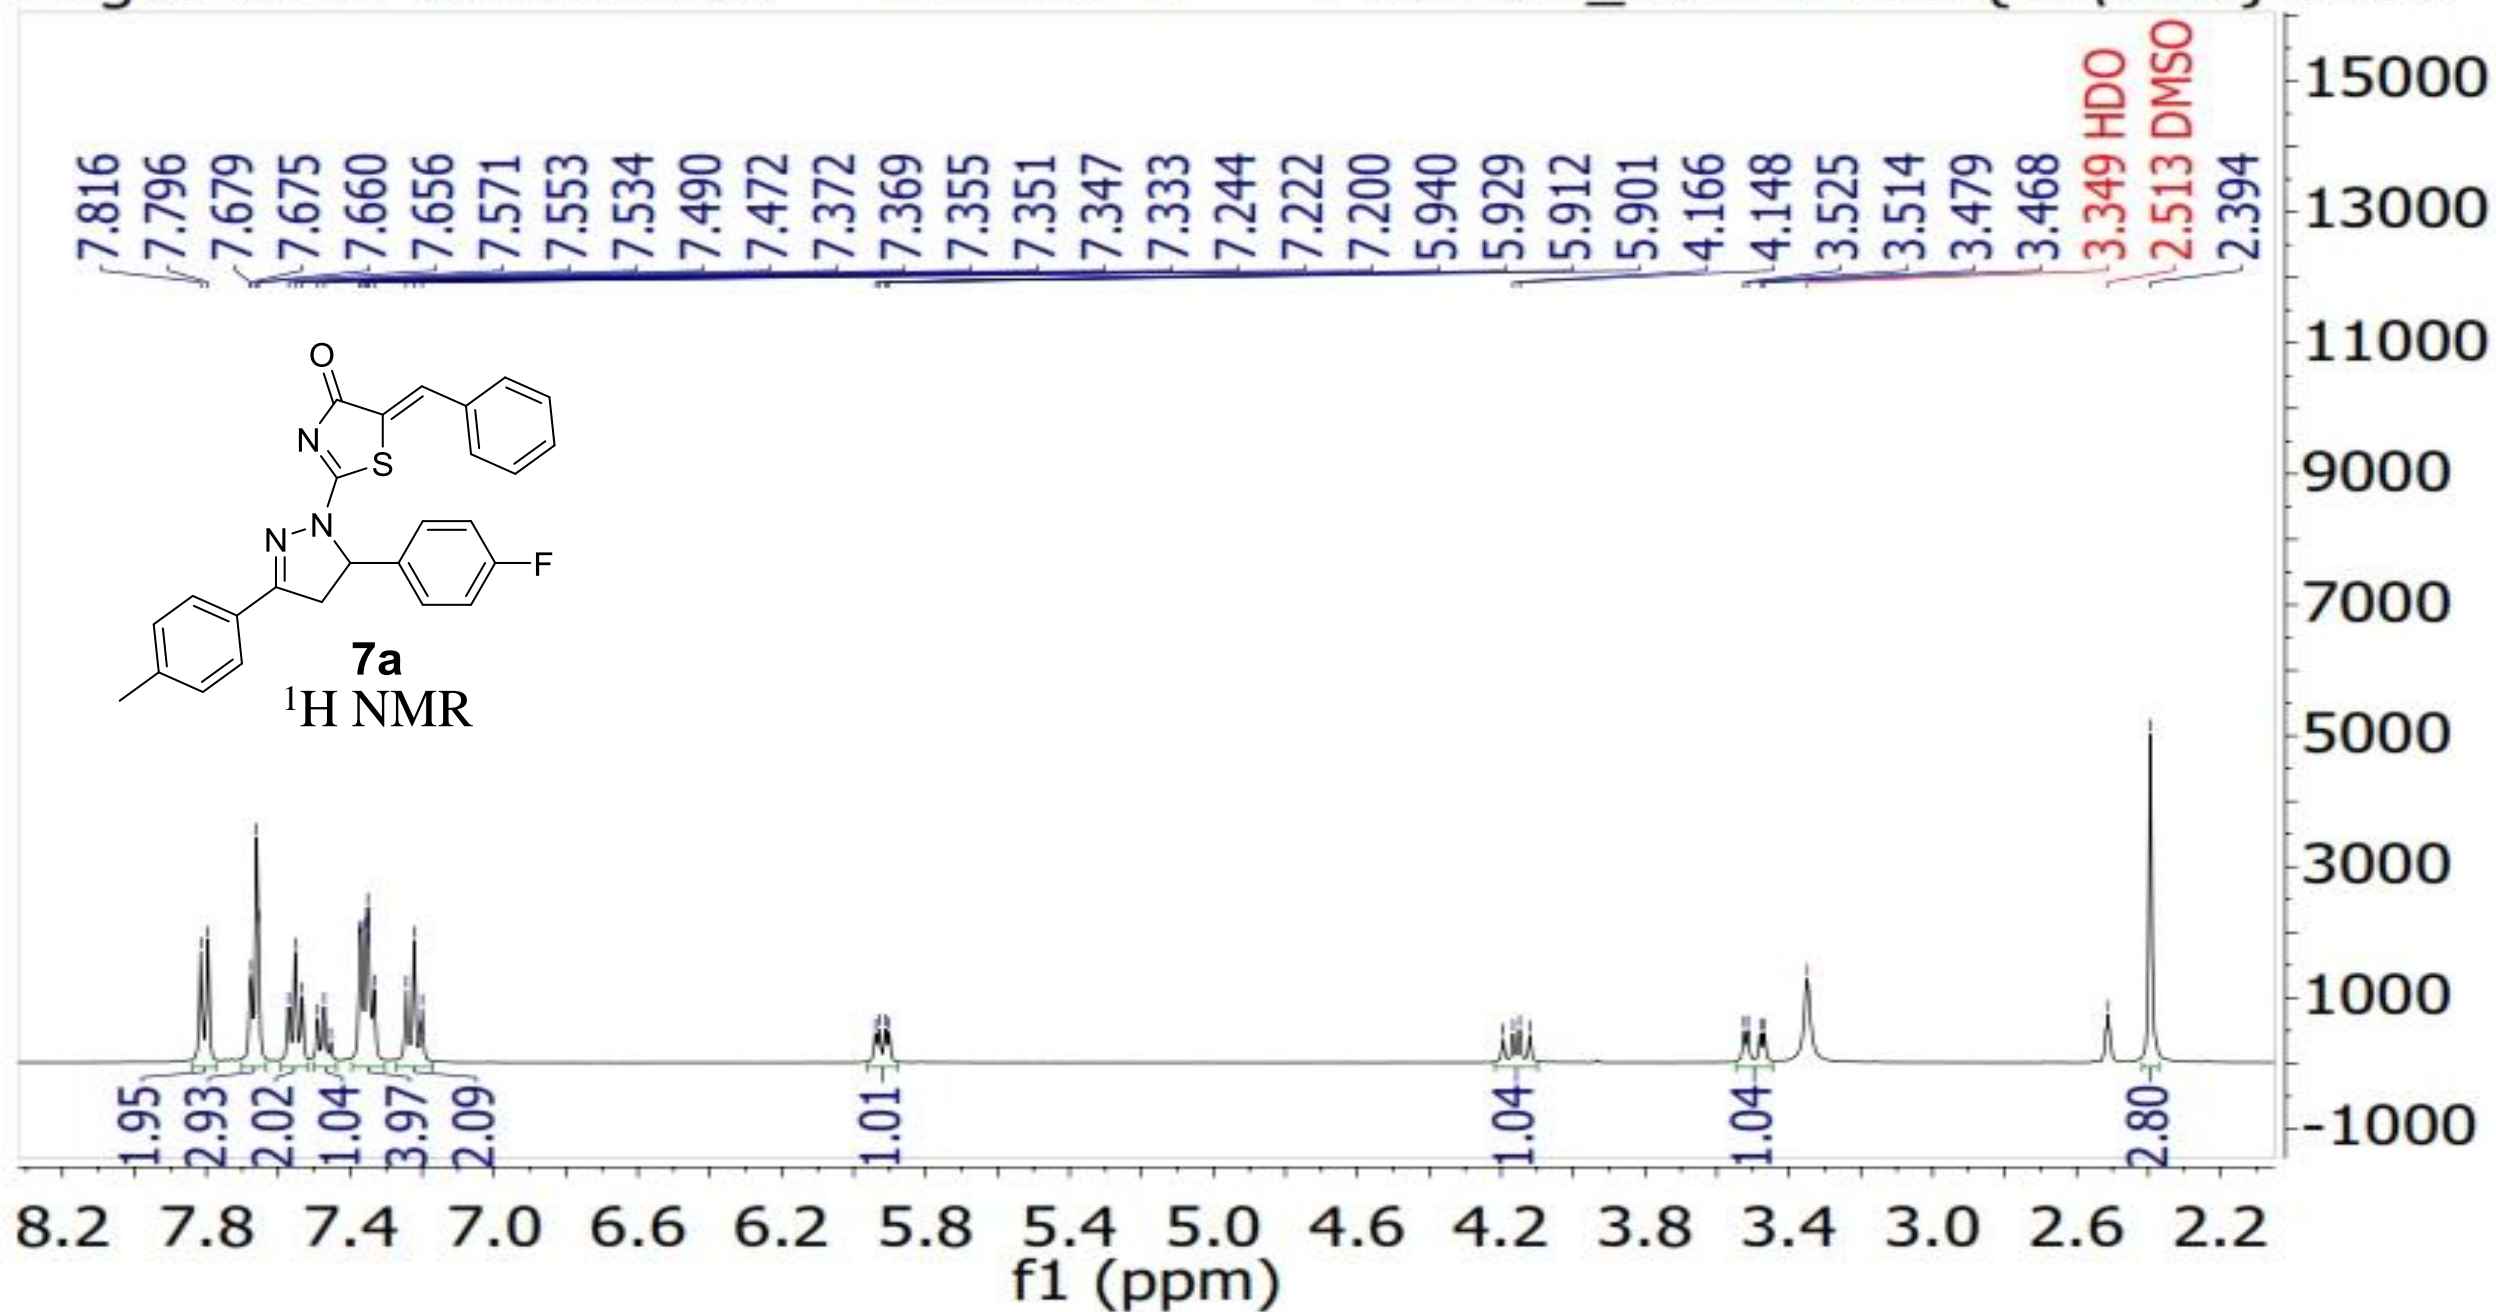

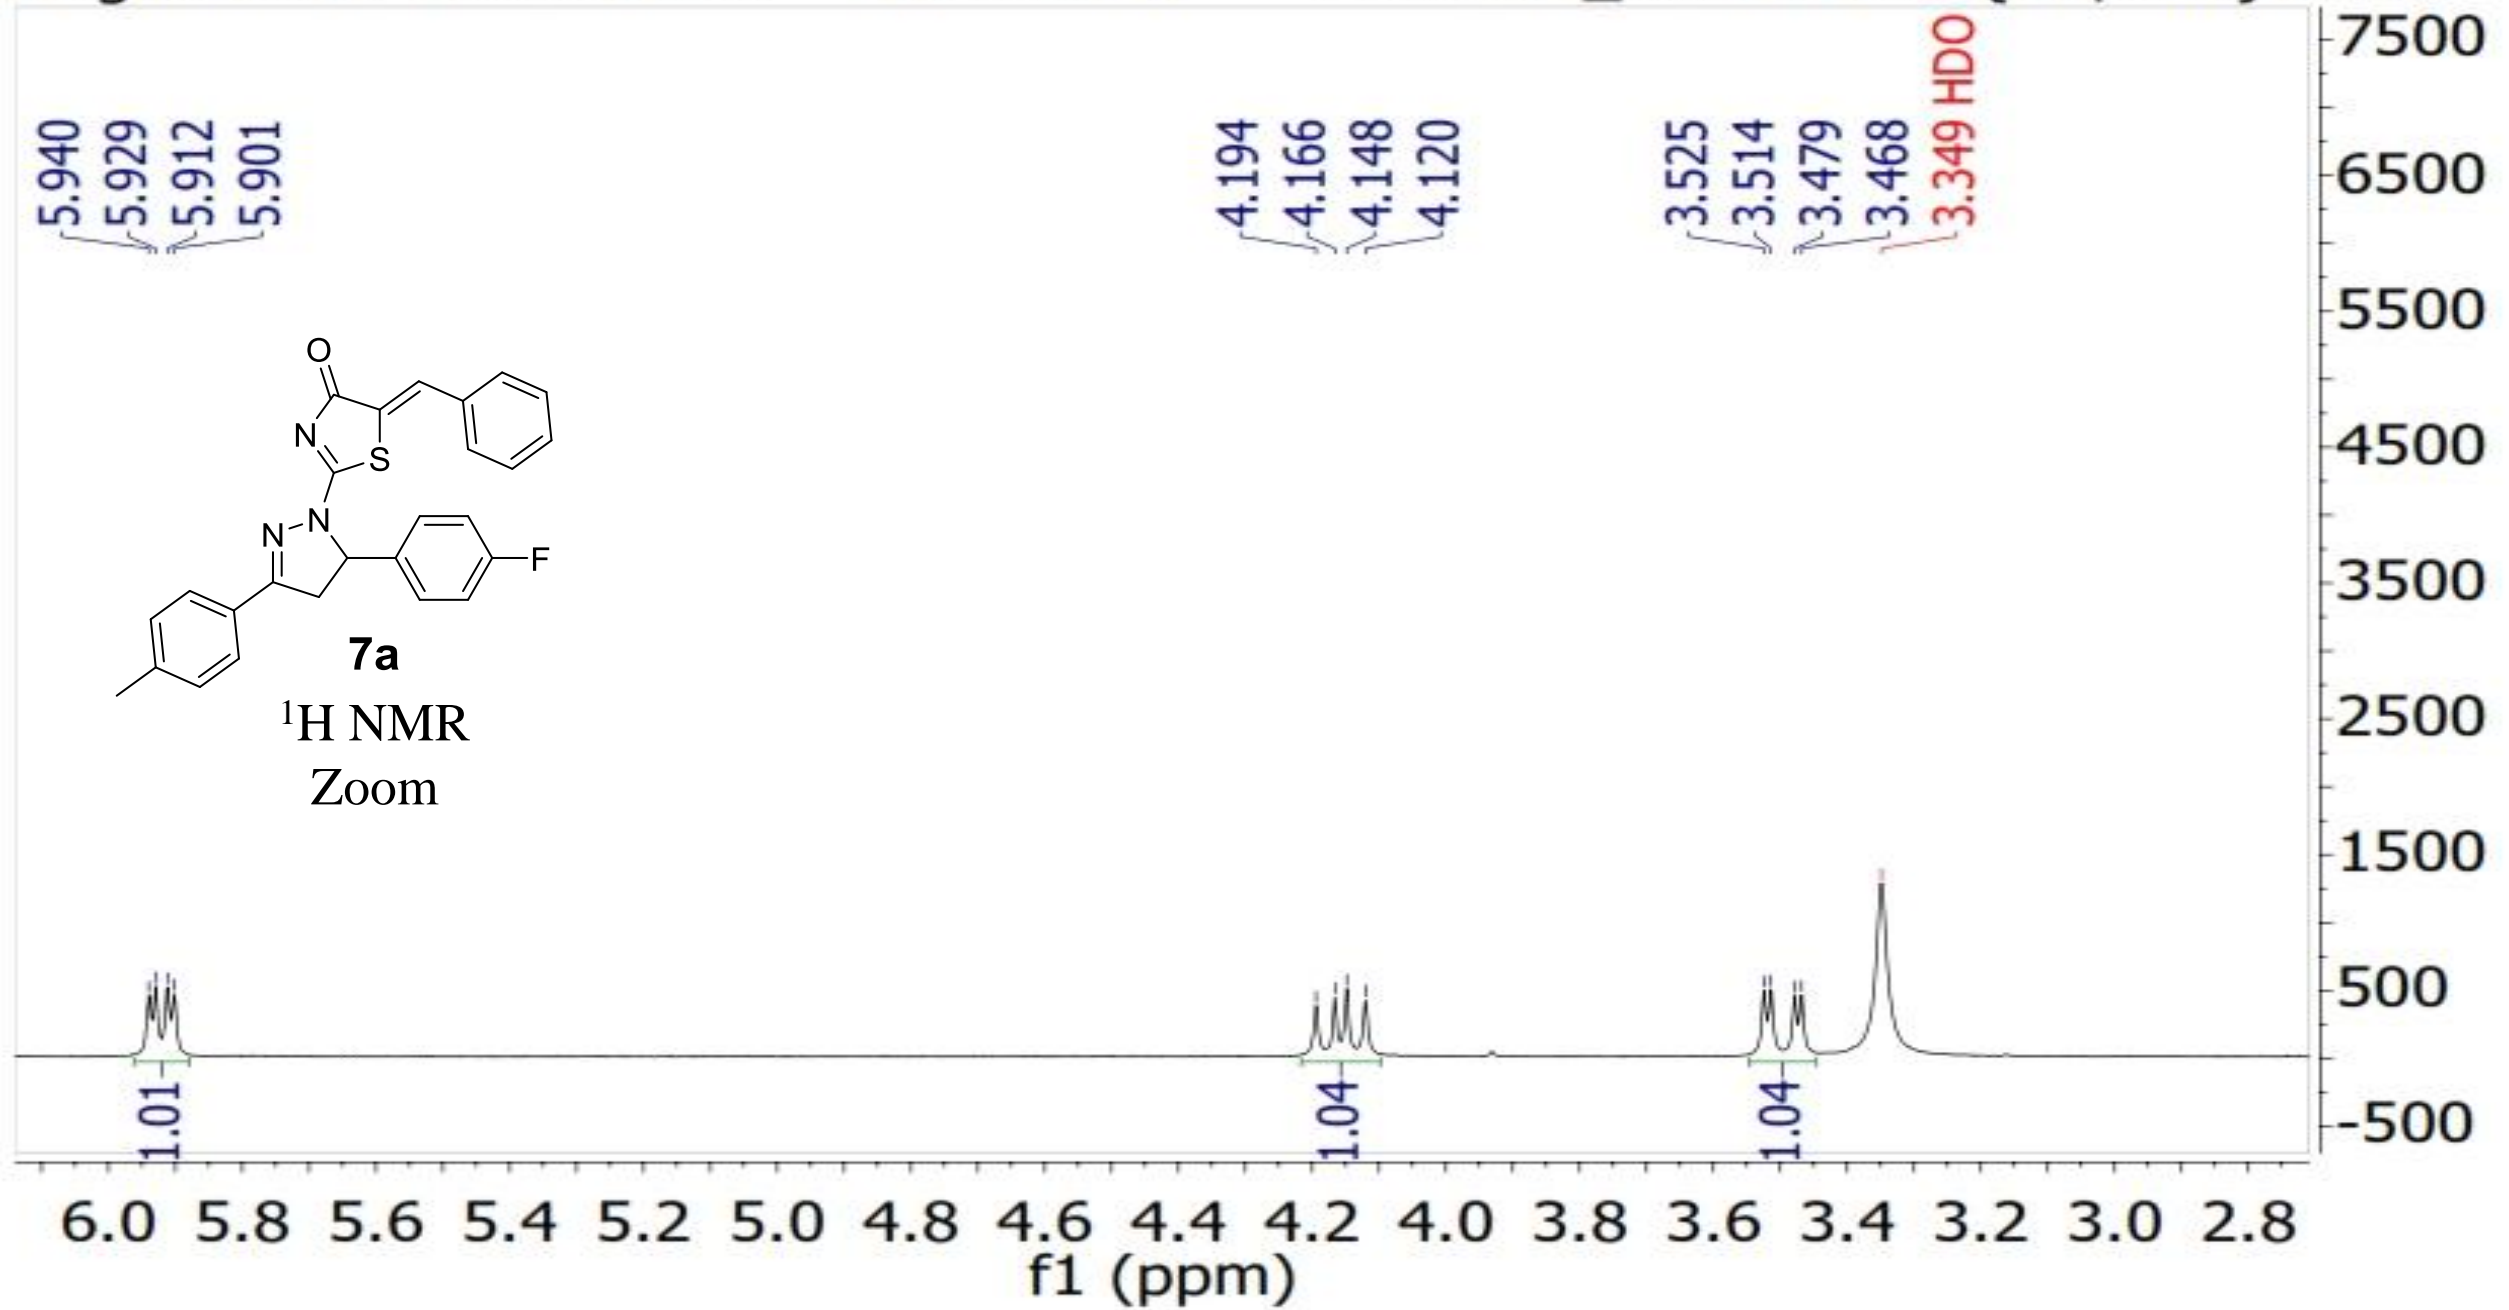



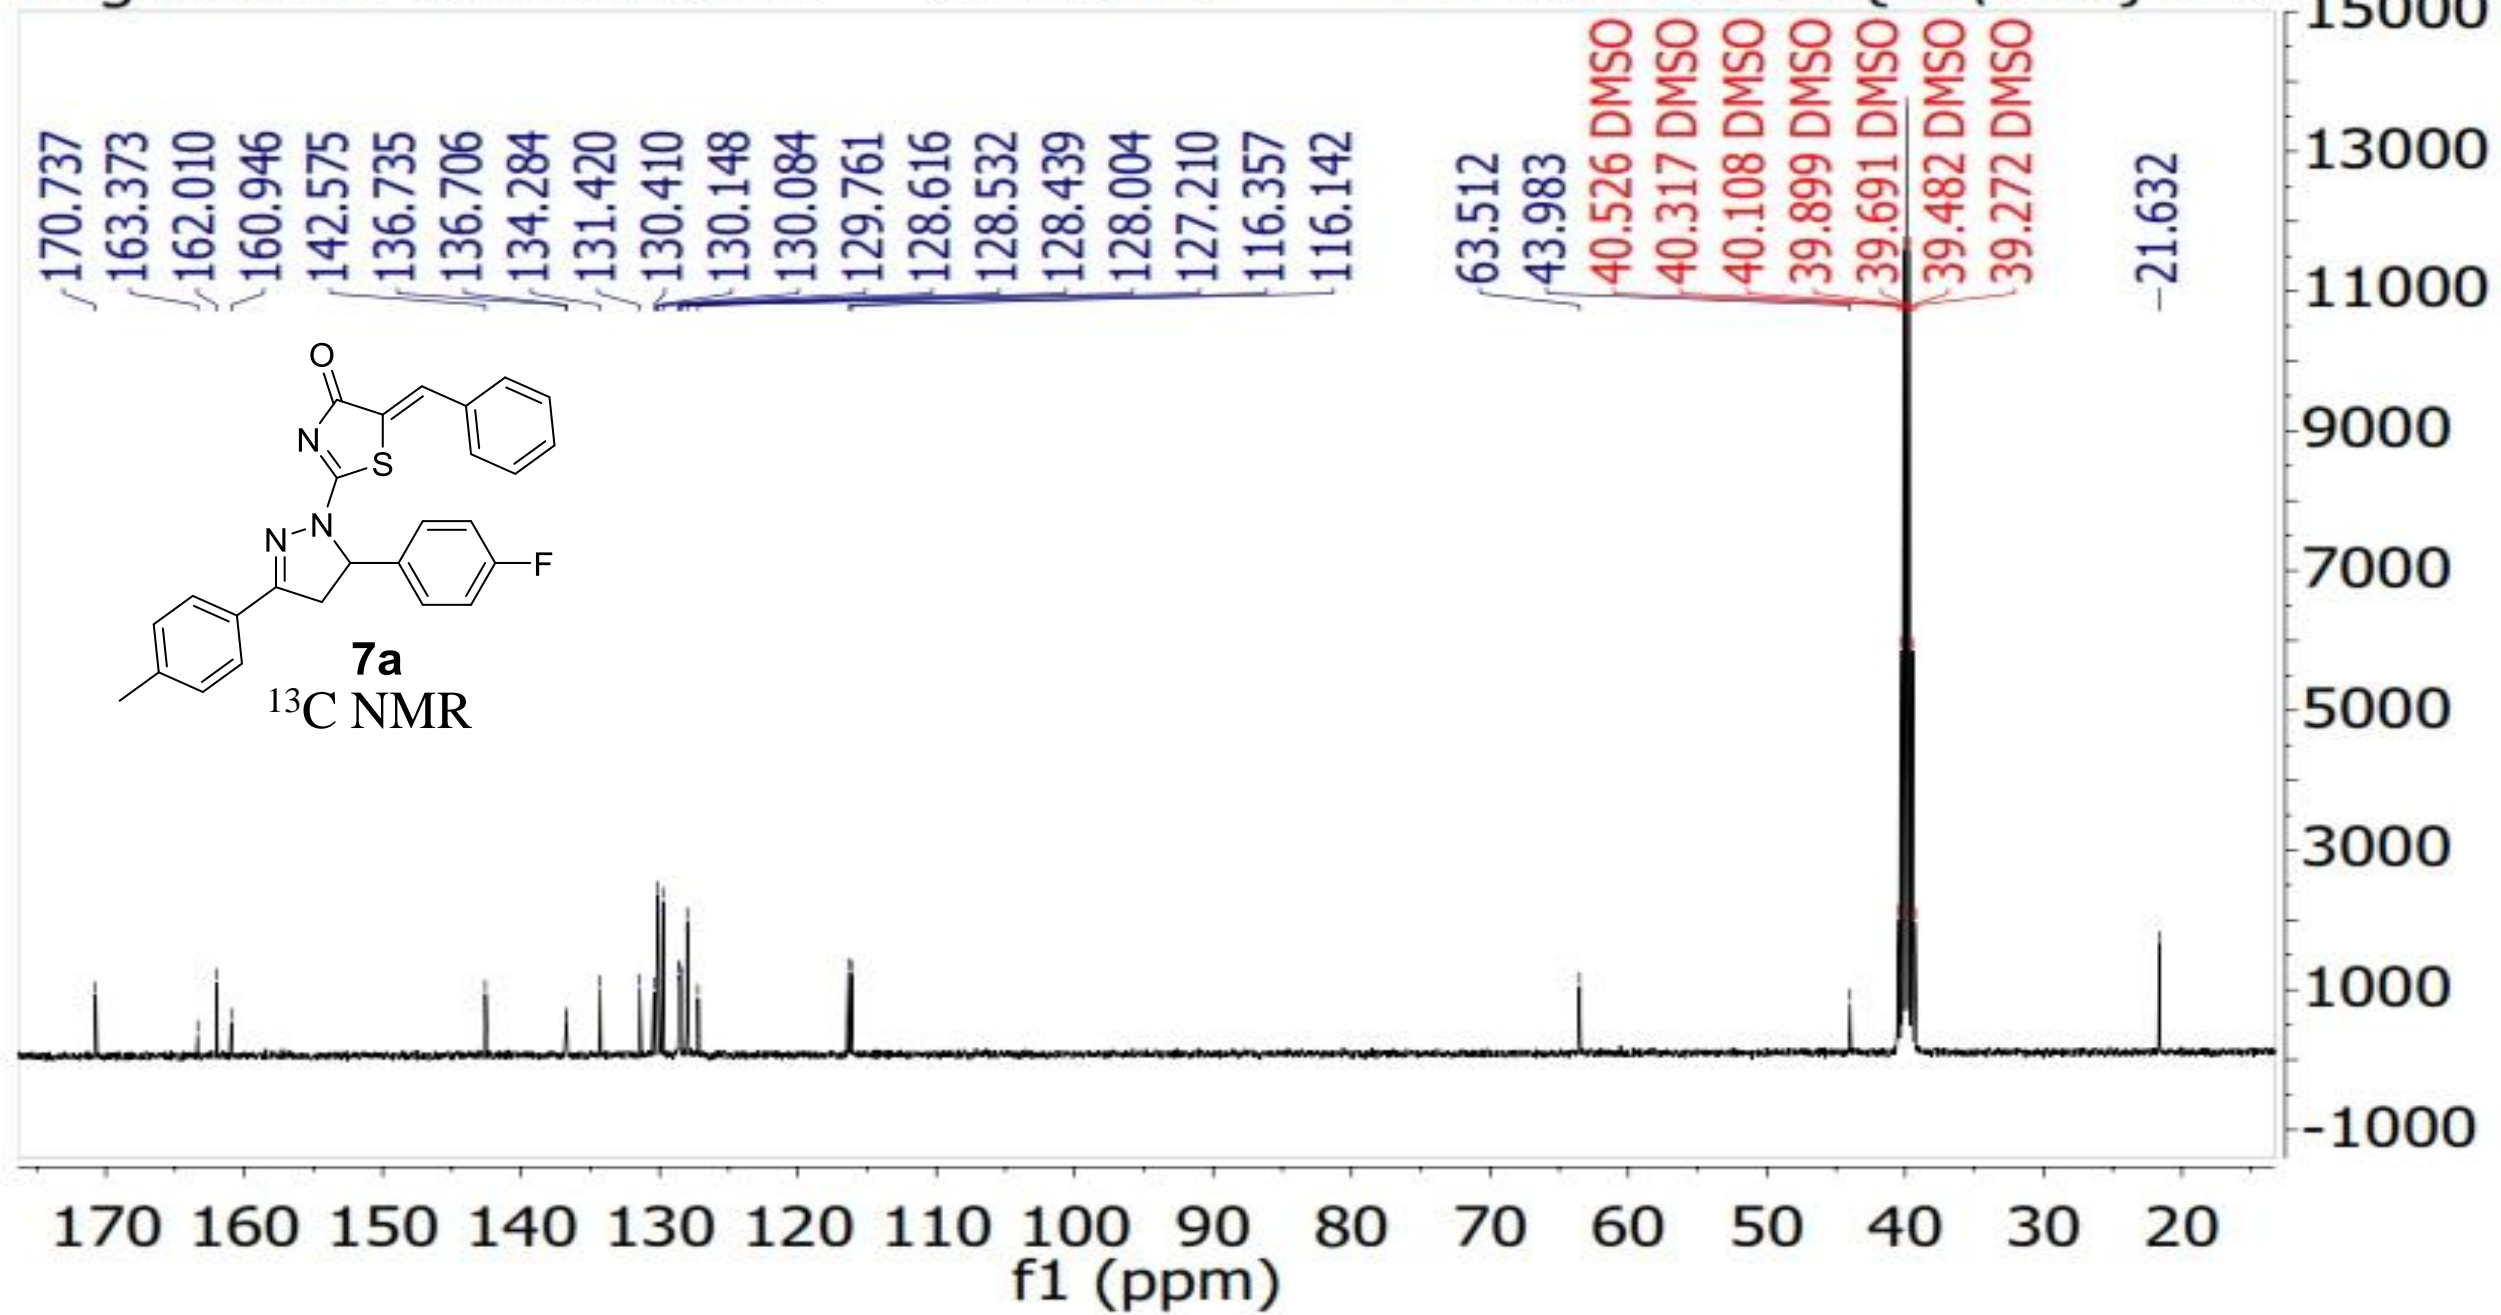

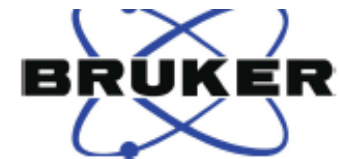

Current Data Parameters  
 NAME Aug08-2021-aber  
 EXPNO 40  
 PROCNO 1

F2 - Acquisition Parameters  
 Date\_ 20210808  
 Time 10.48  
 INSTRUM spect  
 PROBHD 5 mm PABBO BB/  
 PULPROG zg30  
 TD 65536  
 SOLVENT DMSO  
 NS 16  
 DS 2  
 SWH 8012.820 Hz  
 FIDRES 0.122266 Hz  
 AQ 4.0894465 sec  
 RG 147.93  
 DW 62.400 usec  
 DE 6.50 usec  
 TE 298.8 K  
 D1 1.00000000 sec  
 TD0 1

===== CHANNEL f1 =====  
 SFO1 400.1324710 MHz  
 NUC1 1H  
 P1 10.00 usec  
 PLW1 16.00000000 W

F2 - Processing parameters  
 SI 65536  
 SF 400.1300000 MHz  
 WDW EM  
 SSB 0  
 LB 0.10 Hz  
 GB 0  
 PC 1.00

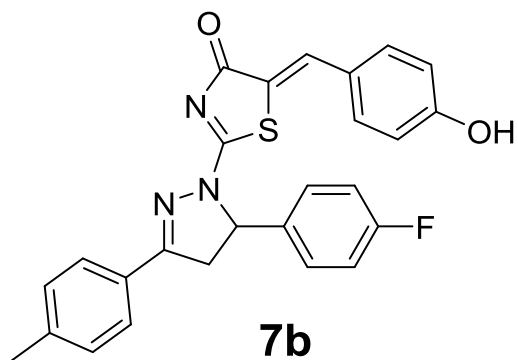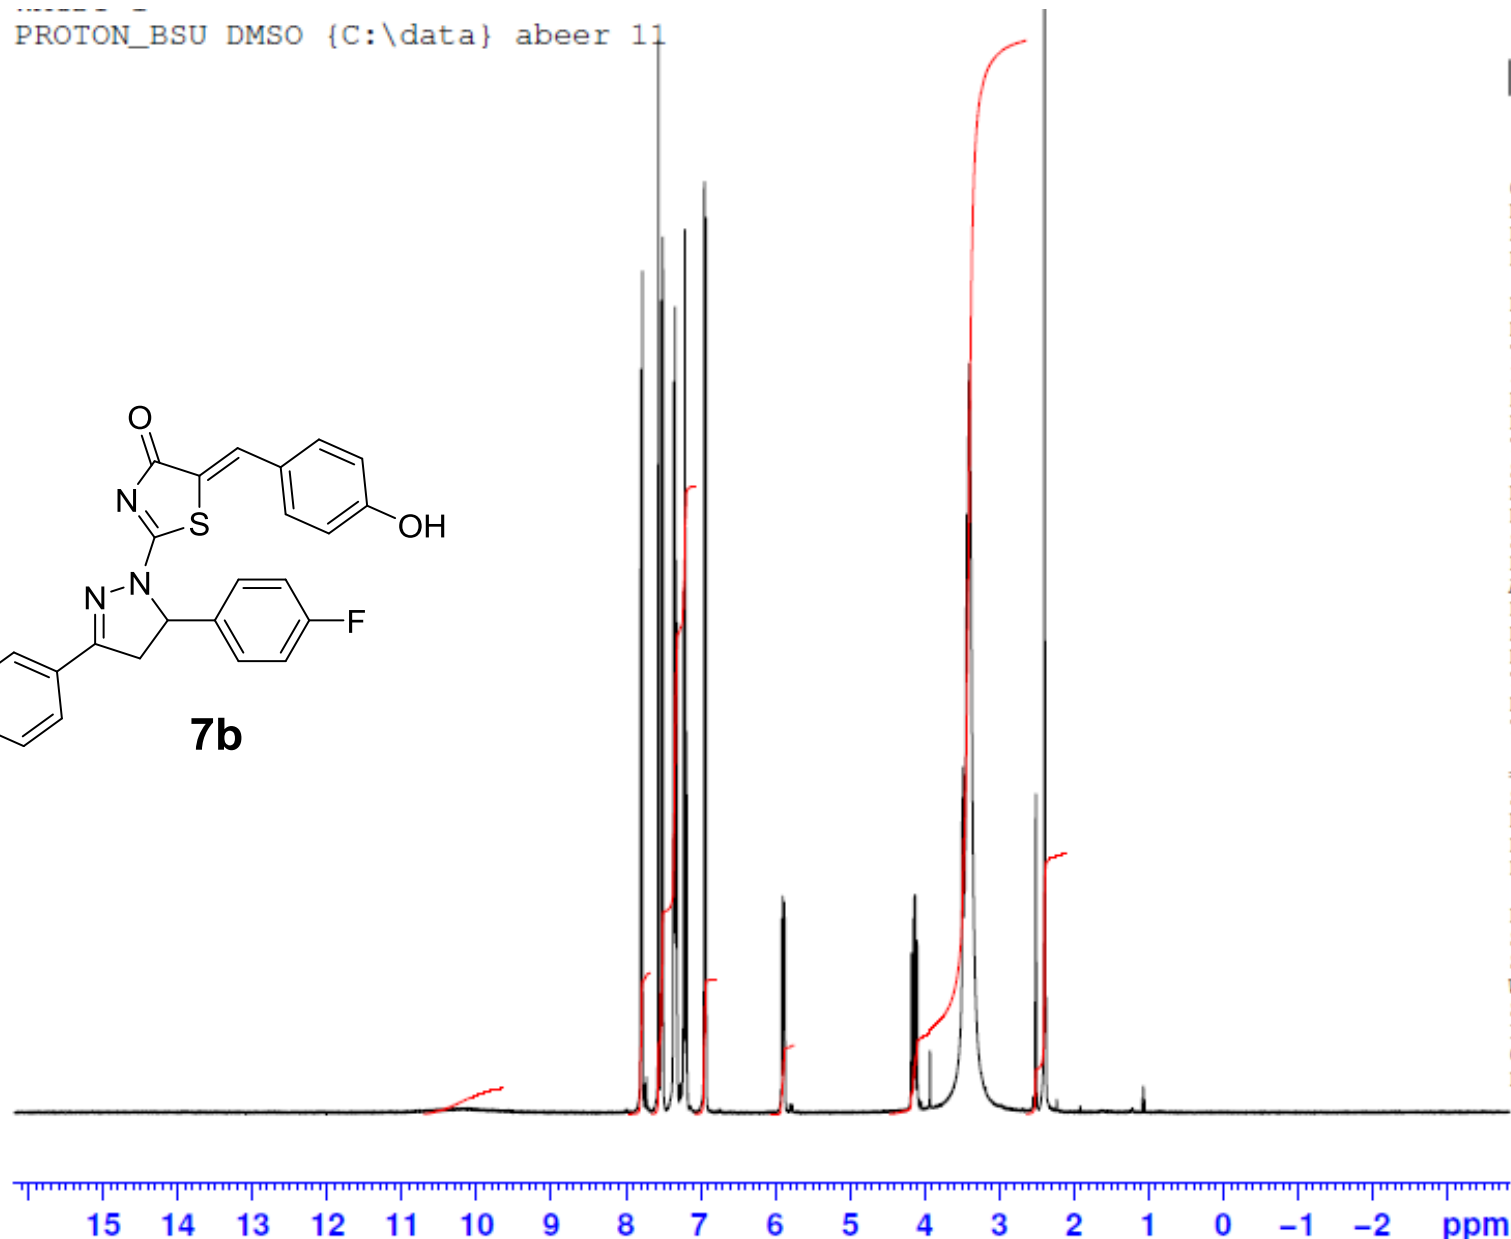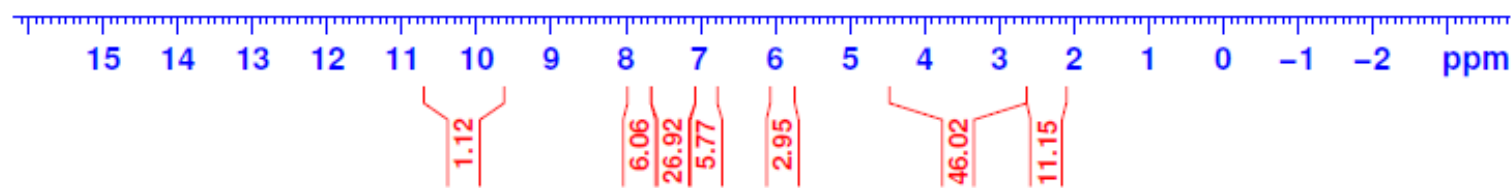



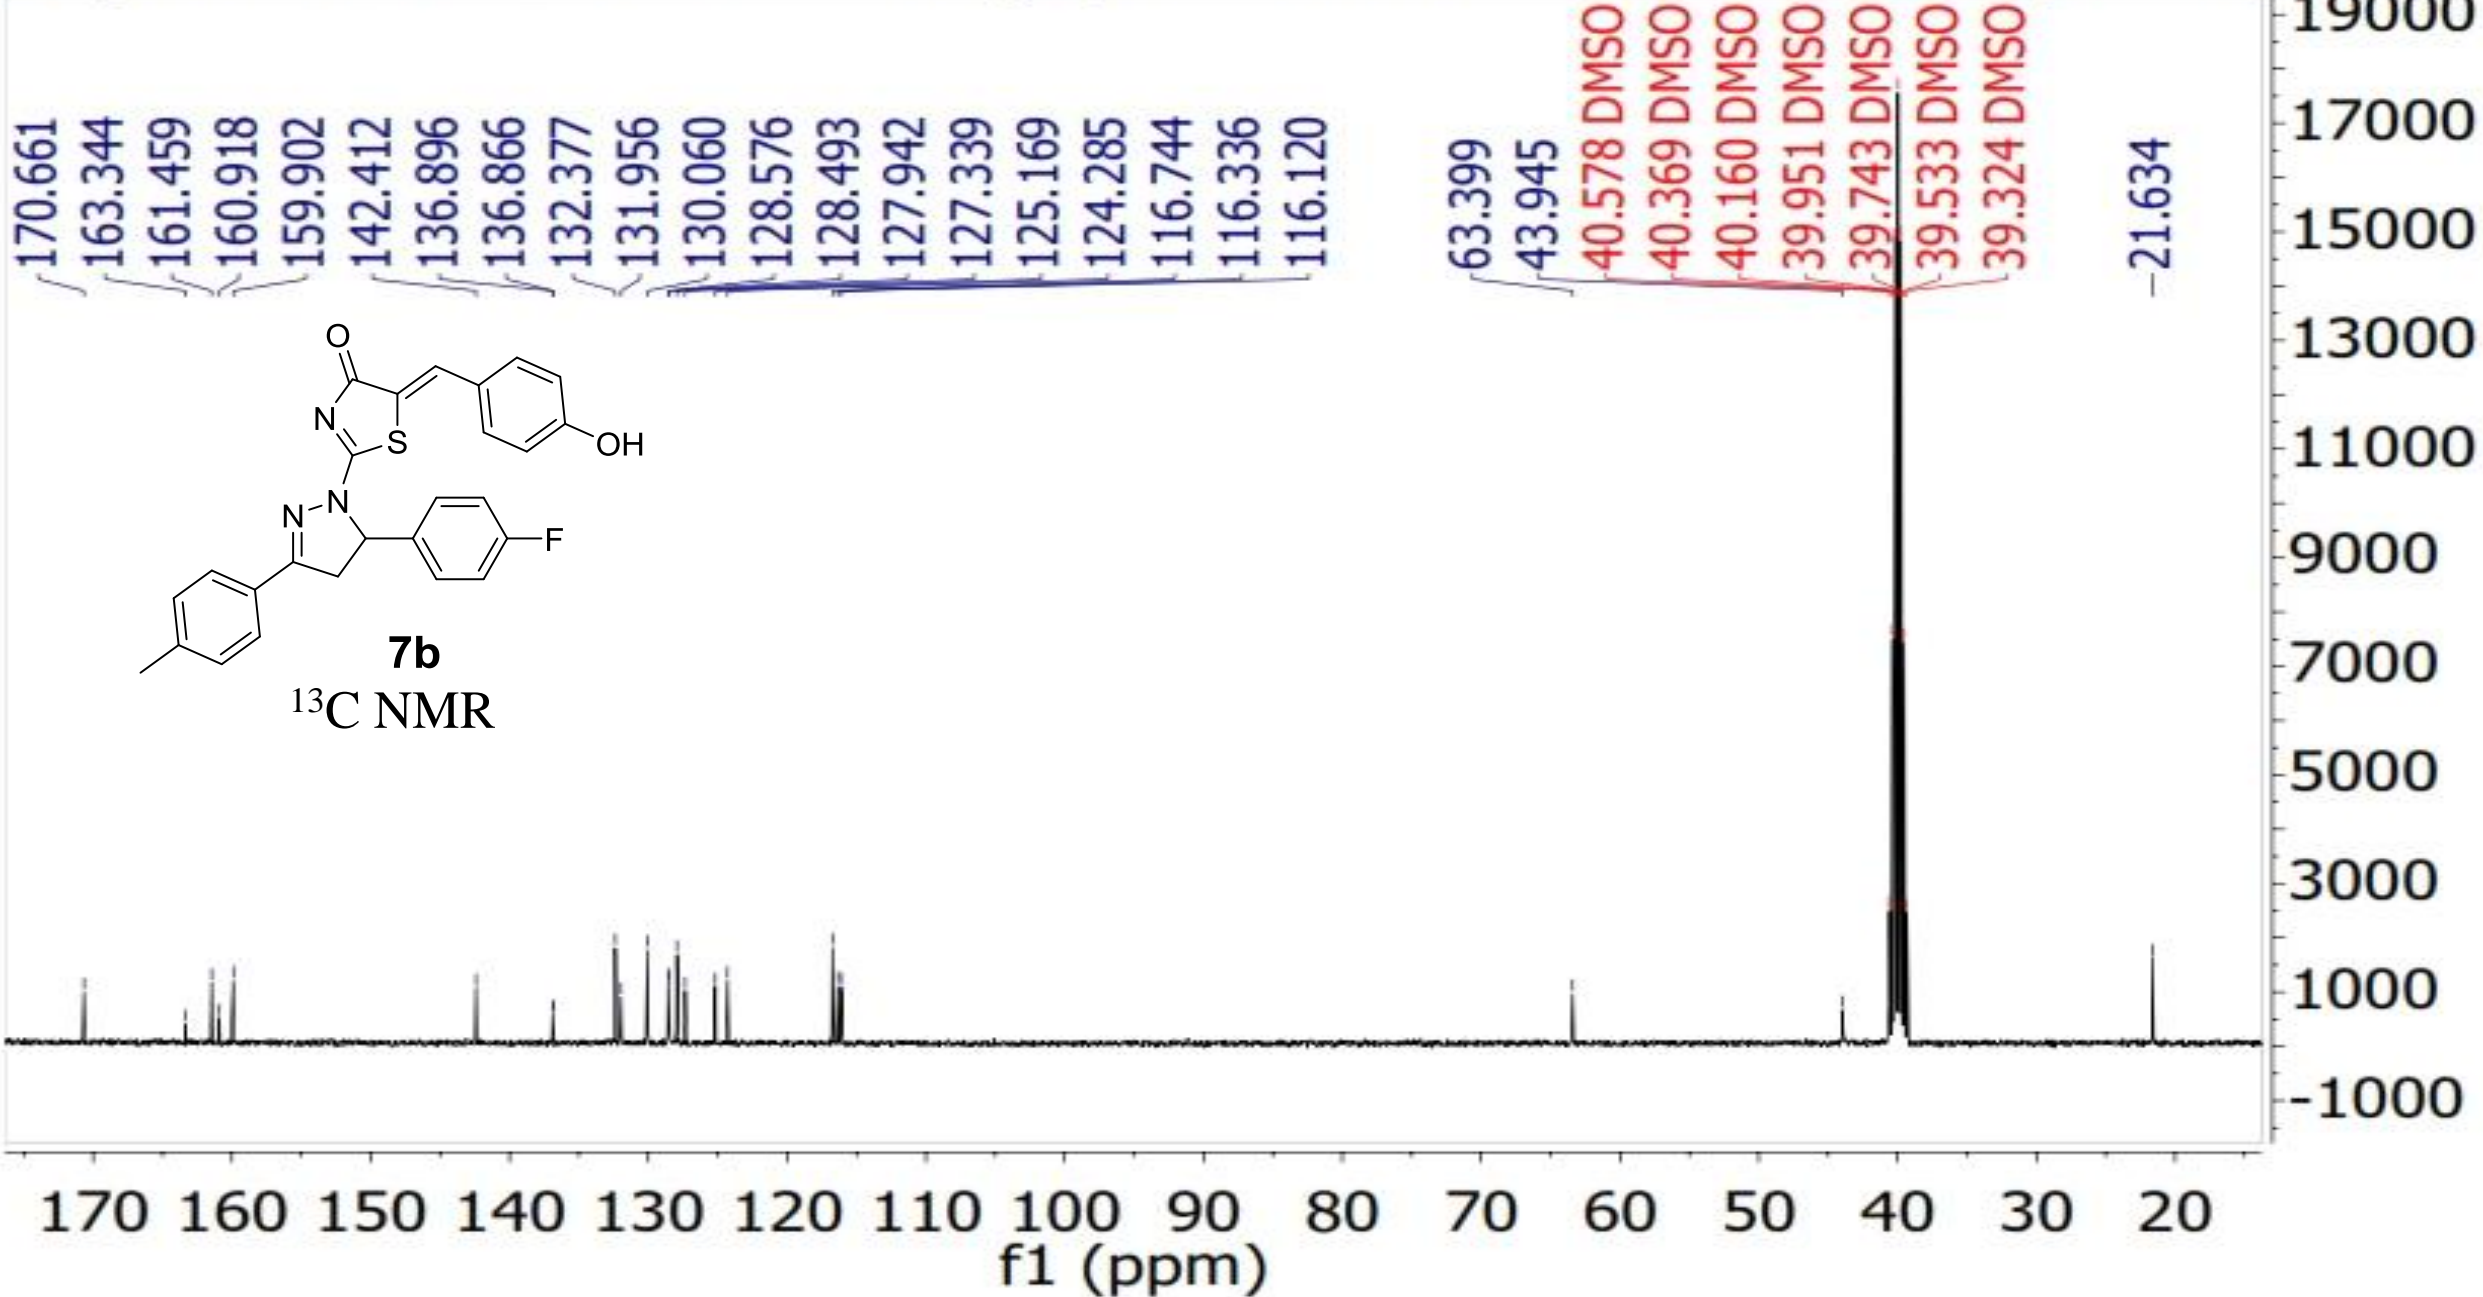

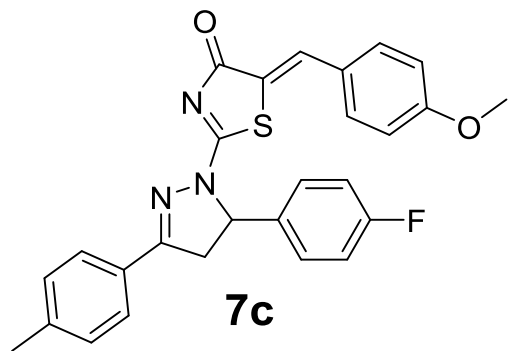

<sup>1</sup>H NMR

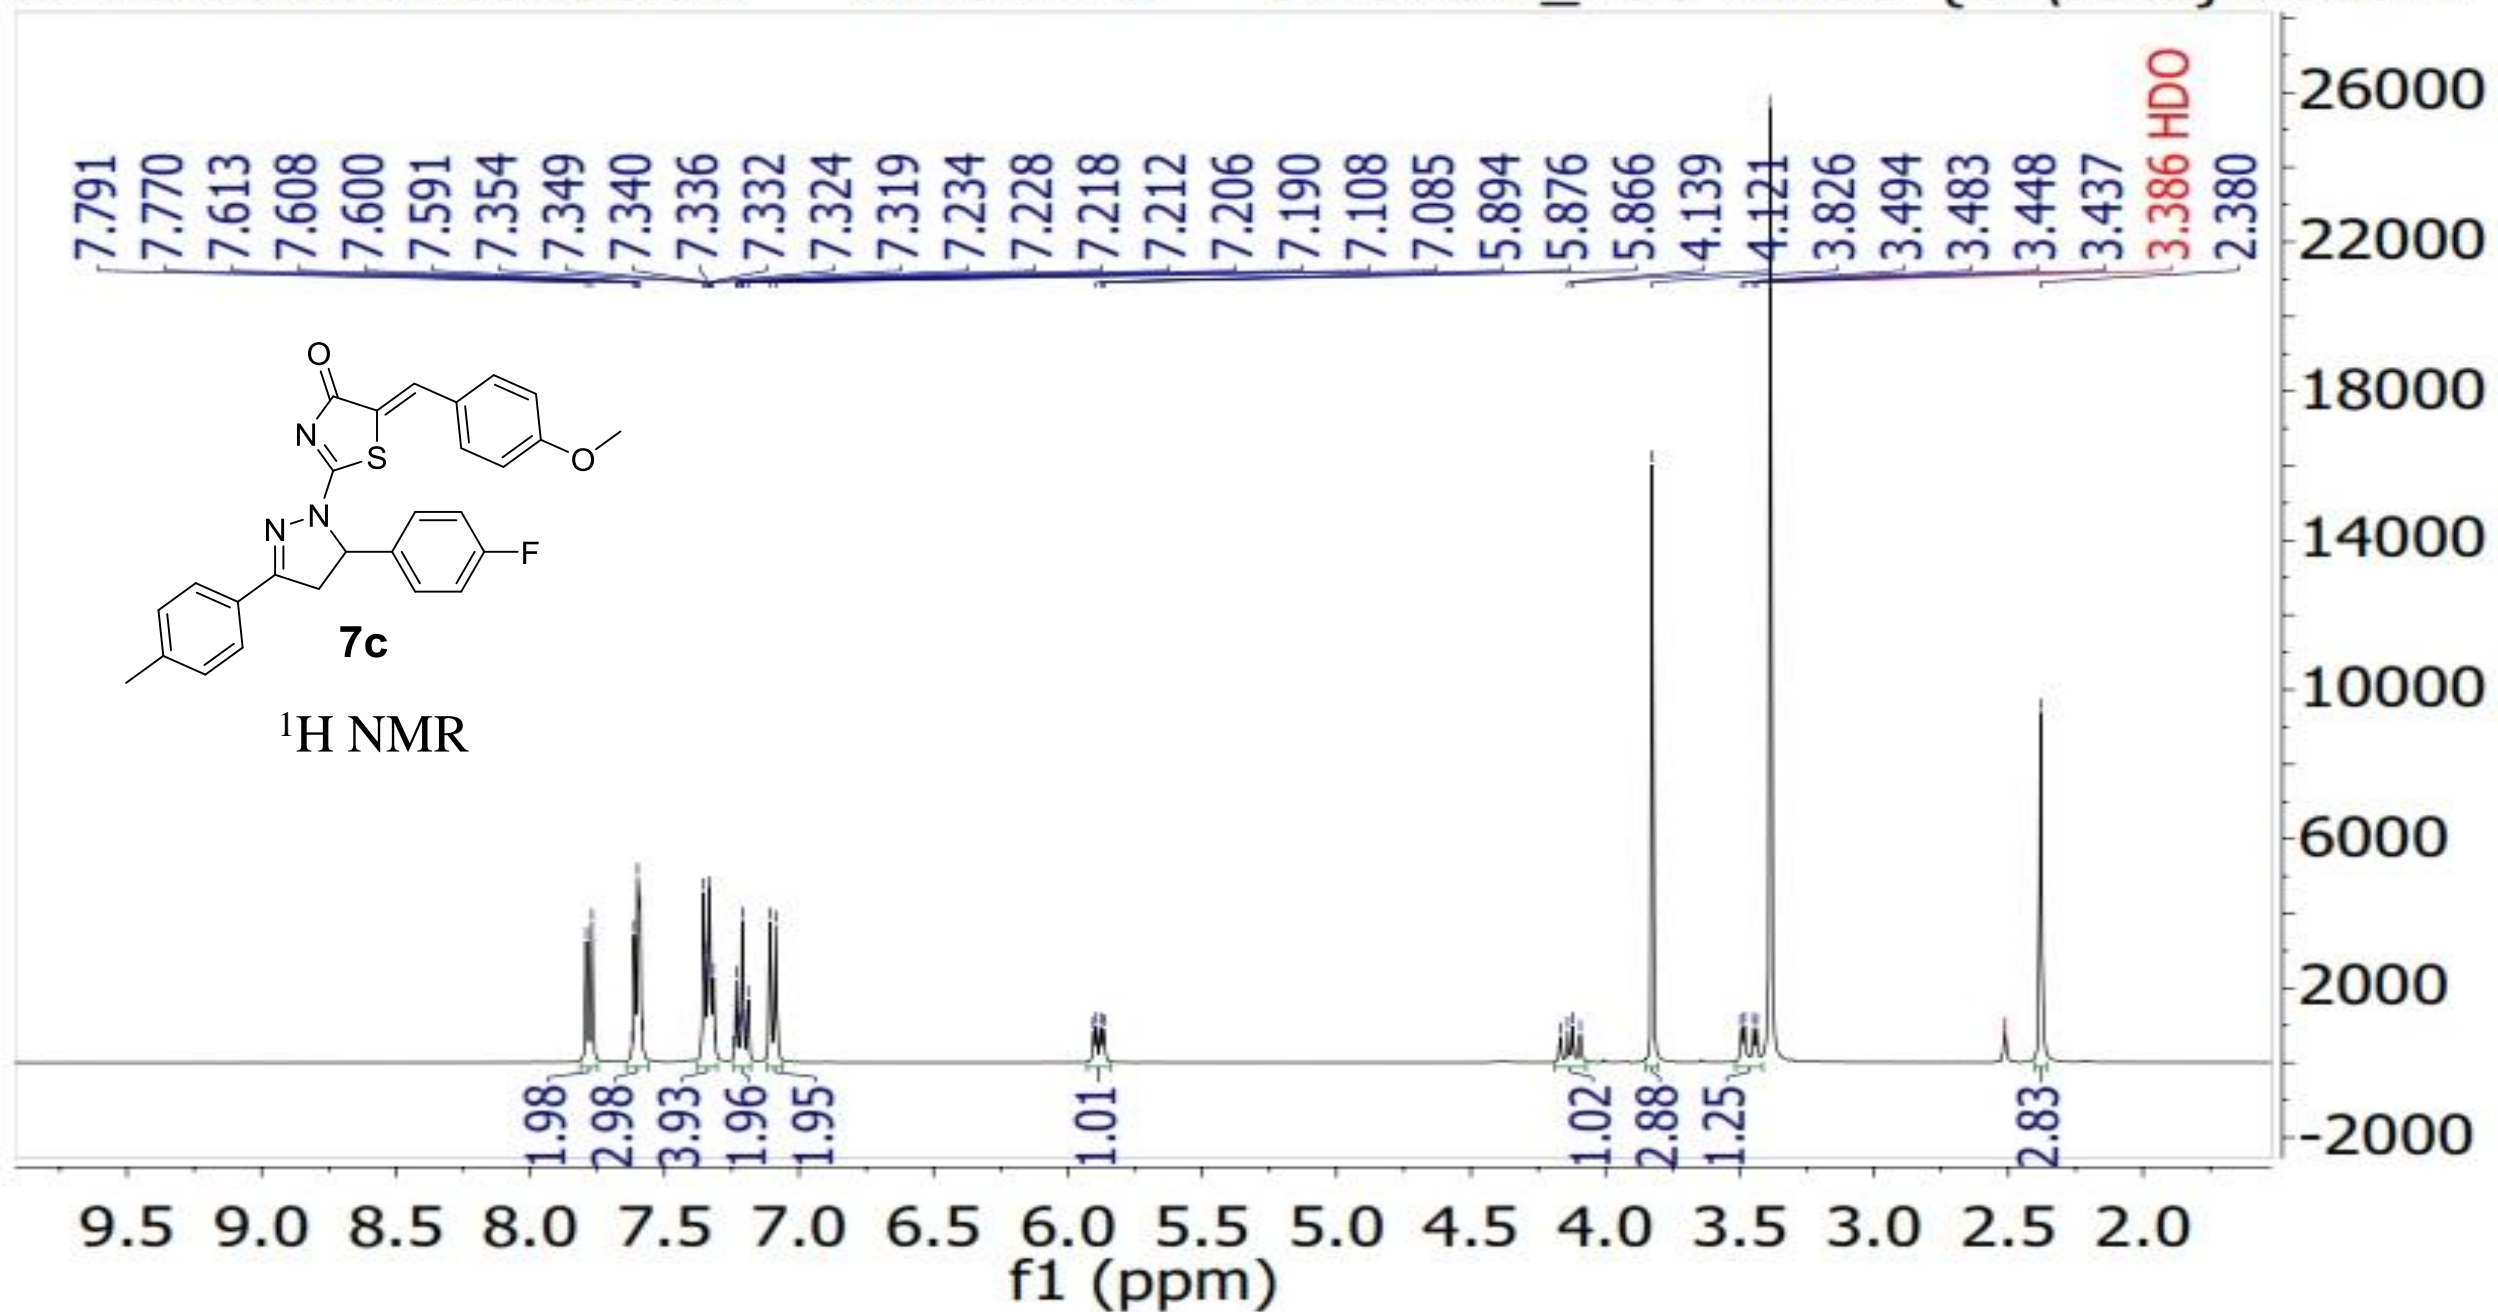

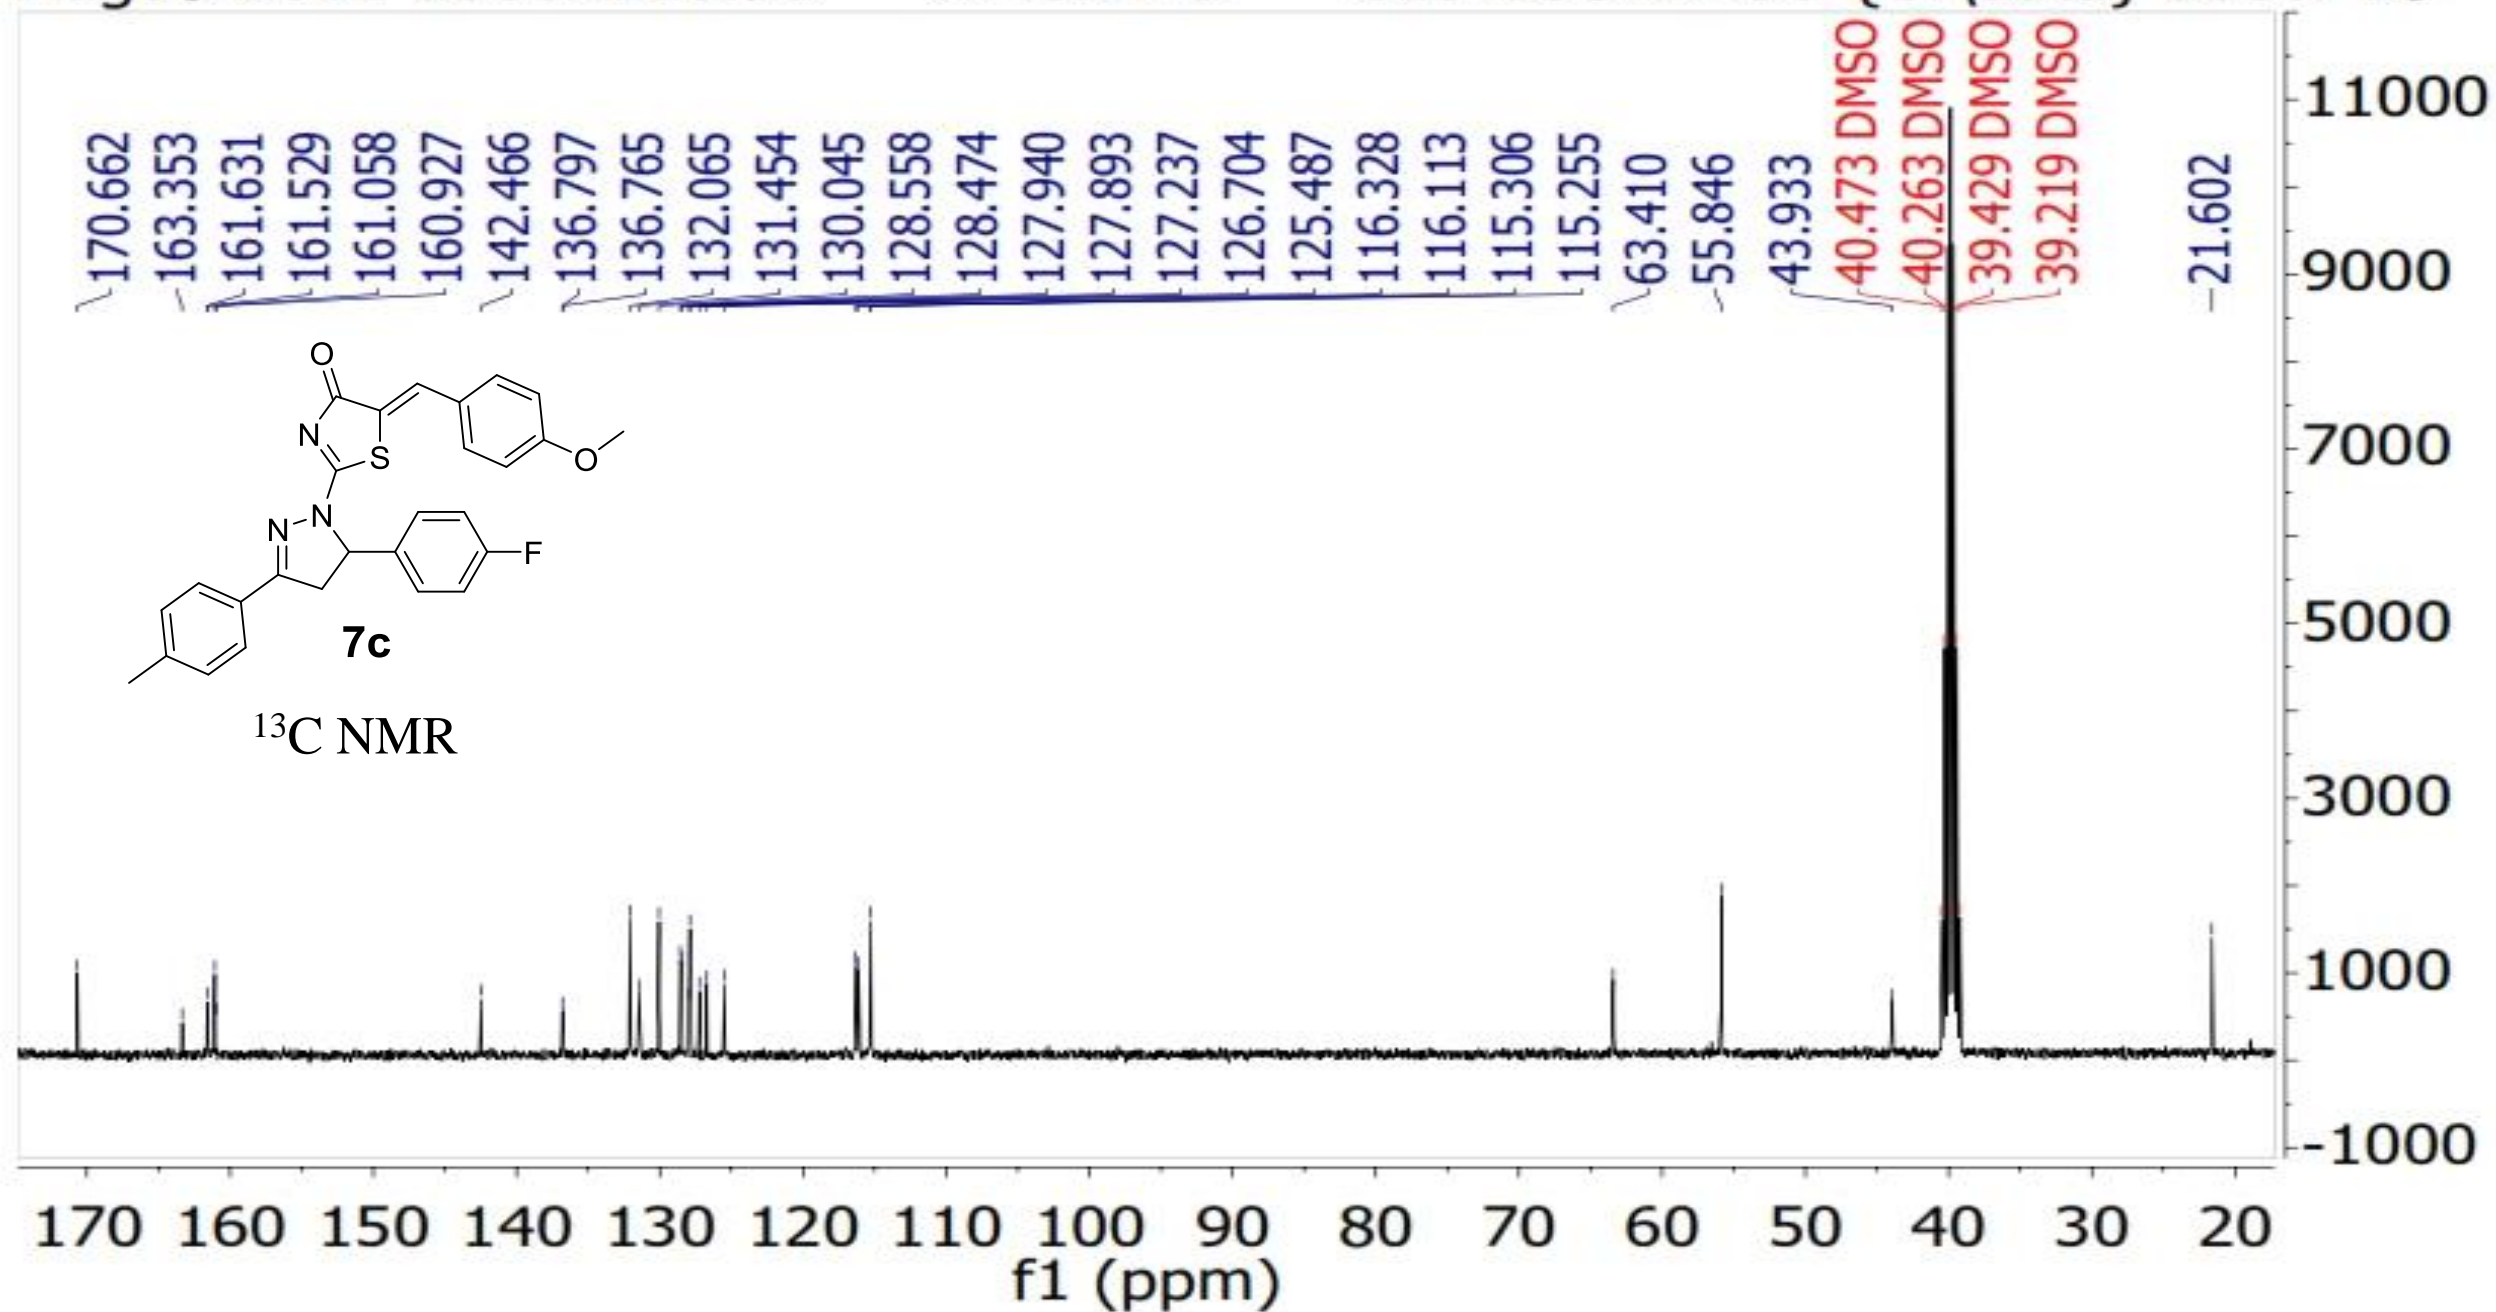



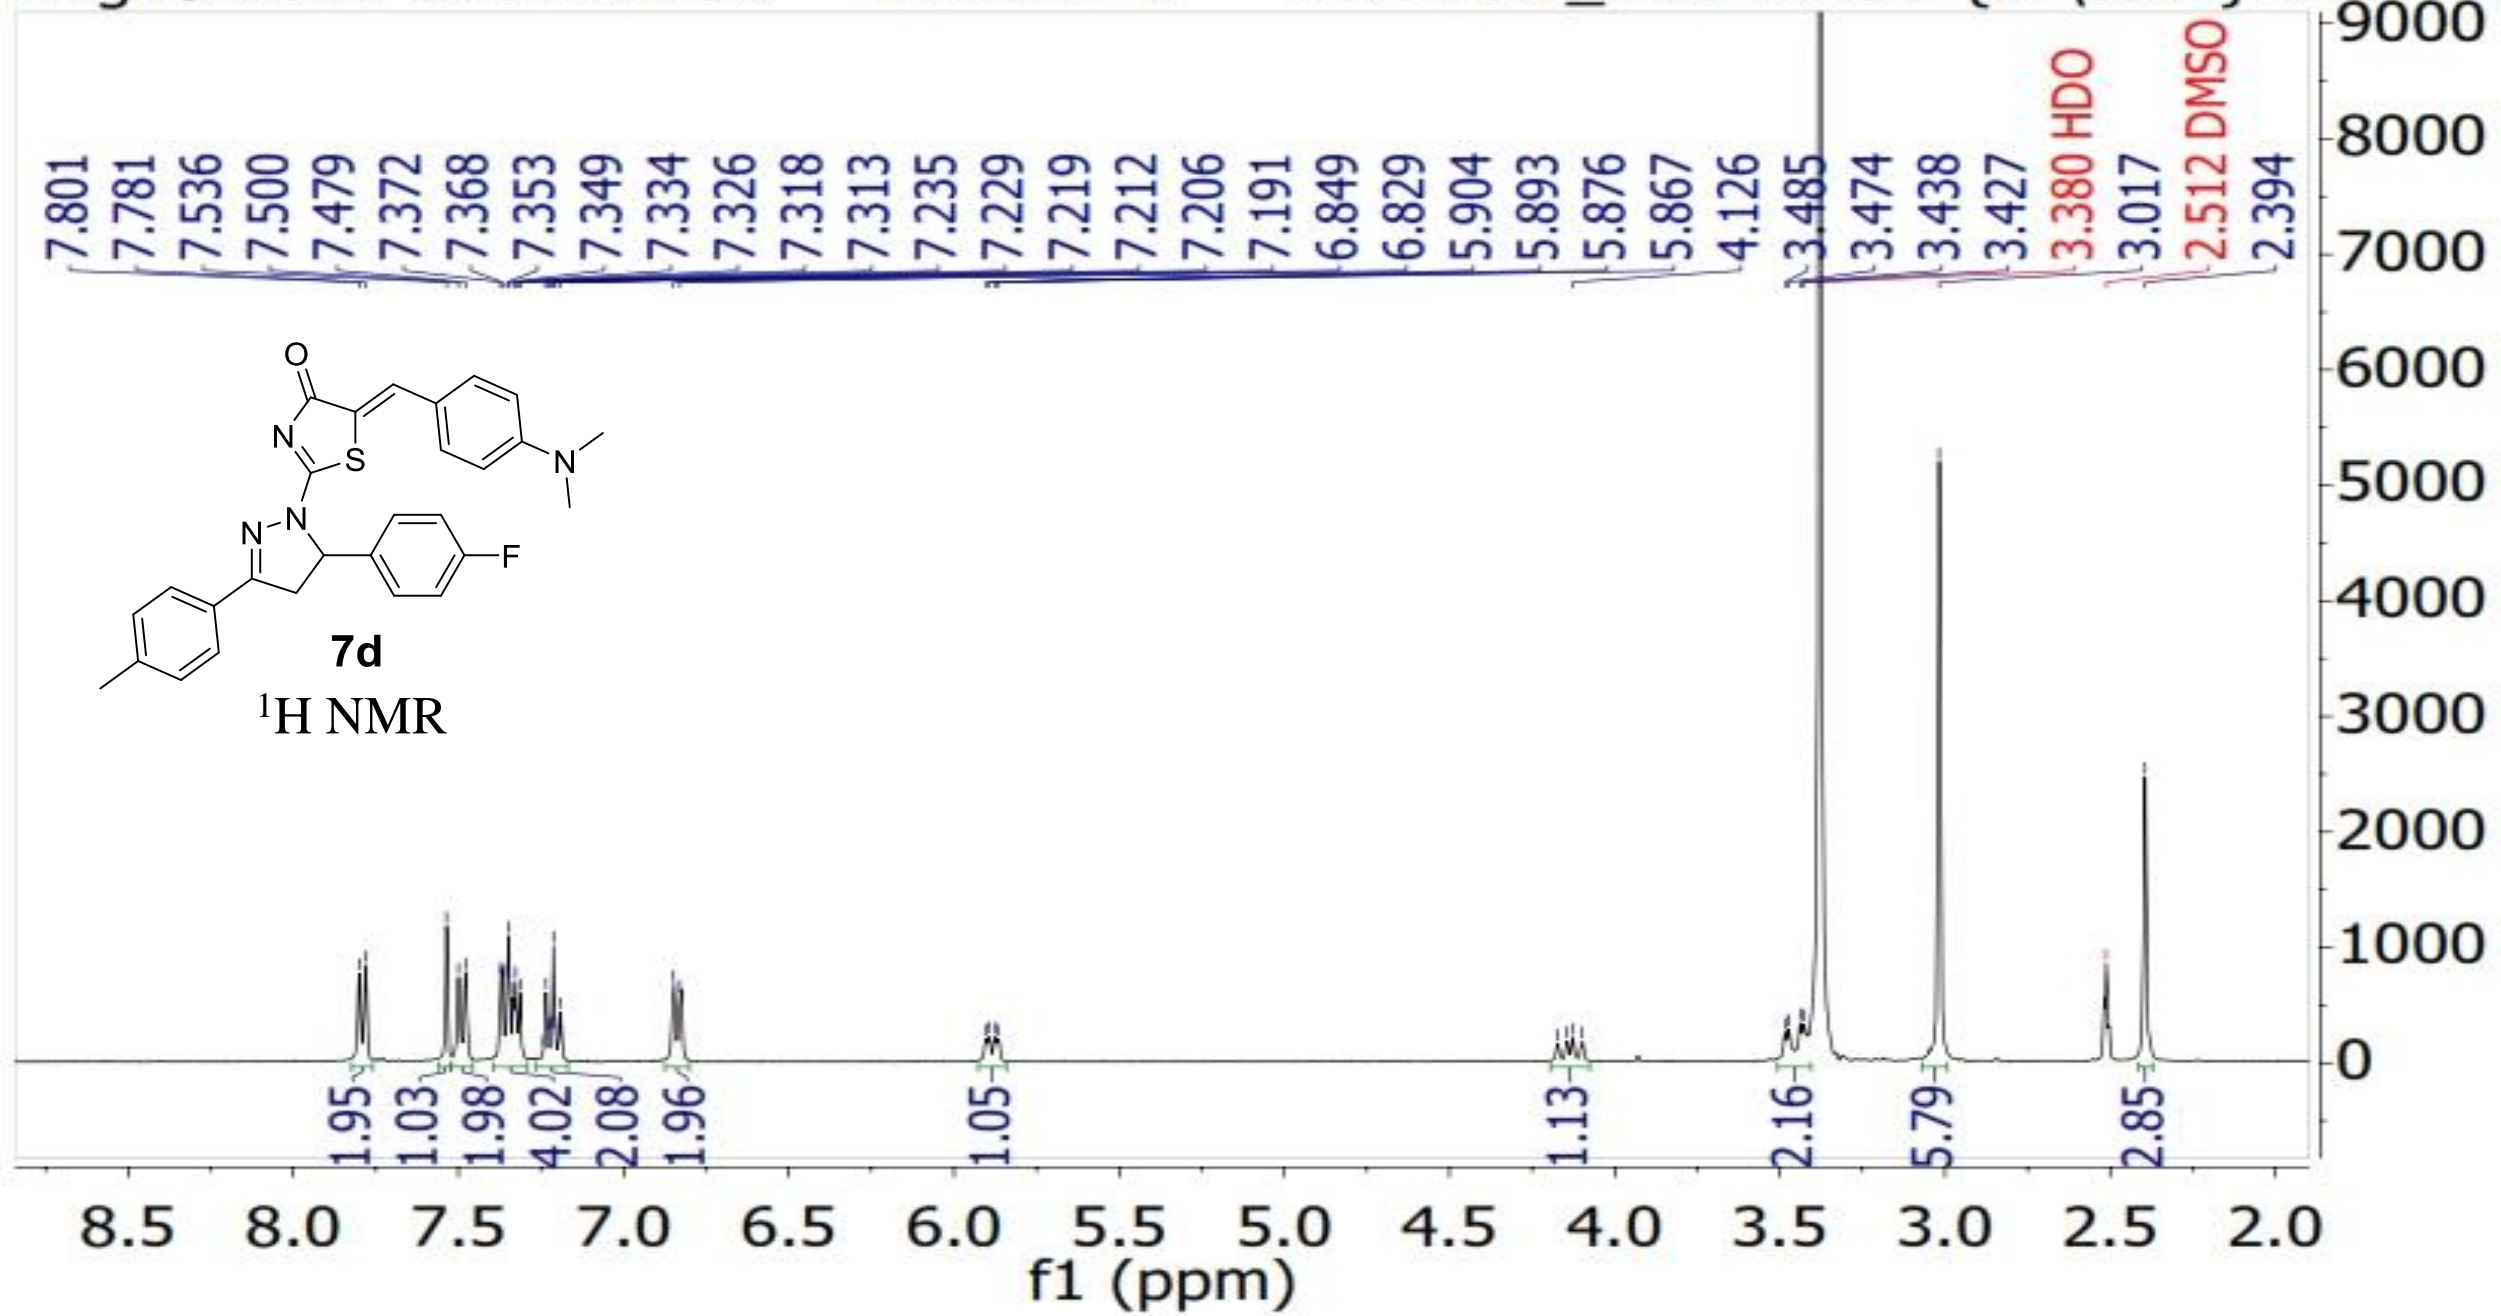

WAGDY-e  
PROTON\_BSU DMSO {C:\data} abeer 16

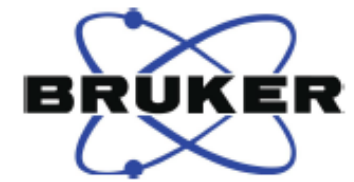

Current Data Parameters  
NAME Aug09-2021-abeer  
EXPNO 140  
PROCNO 1

F2 - Acquisition Parameters  
Date\_ 20210809  
Time 11.07  
INSTRUM spect  
PROBHD 5 mm PABBO BB/  
PULPROG zg30  
TD 65536  
SOLVENT DMSO  
NS 16  
DS 2  
SWH 8012.820 Hz  
FIDRES 0.122266 Hz  
AQ 4.0894465 sec  
RG 116.51  
DW 62.400 usec  
DE 6.50 usec  
TE 299.0 K  
D1 1.00000000 sec  
TD0 1

==== CHANNEL f1 =====  
SFO1 400.1324710 MHz  
NUC1 1H  
P1 10.00 usec  
PLW1 16.00000000 W

F2 - Processing parameters  
SI 65536  
SF 400.1300000 MHz  
WDW EM  
SSB 0  
LB 0.10 Hz  
GB 0  
PC 1.00

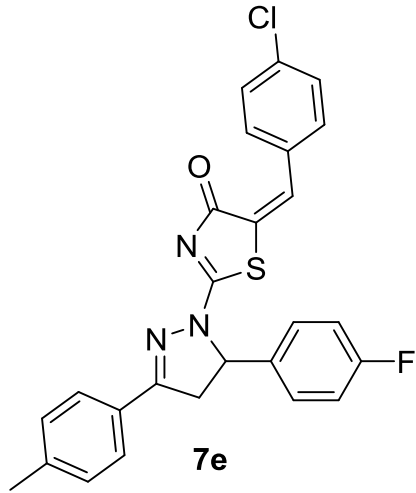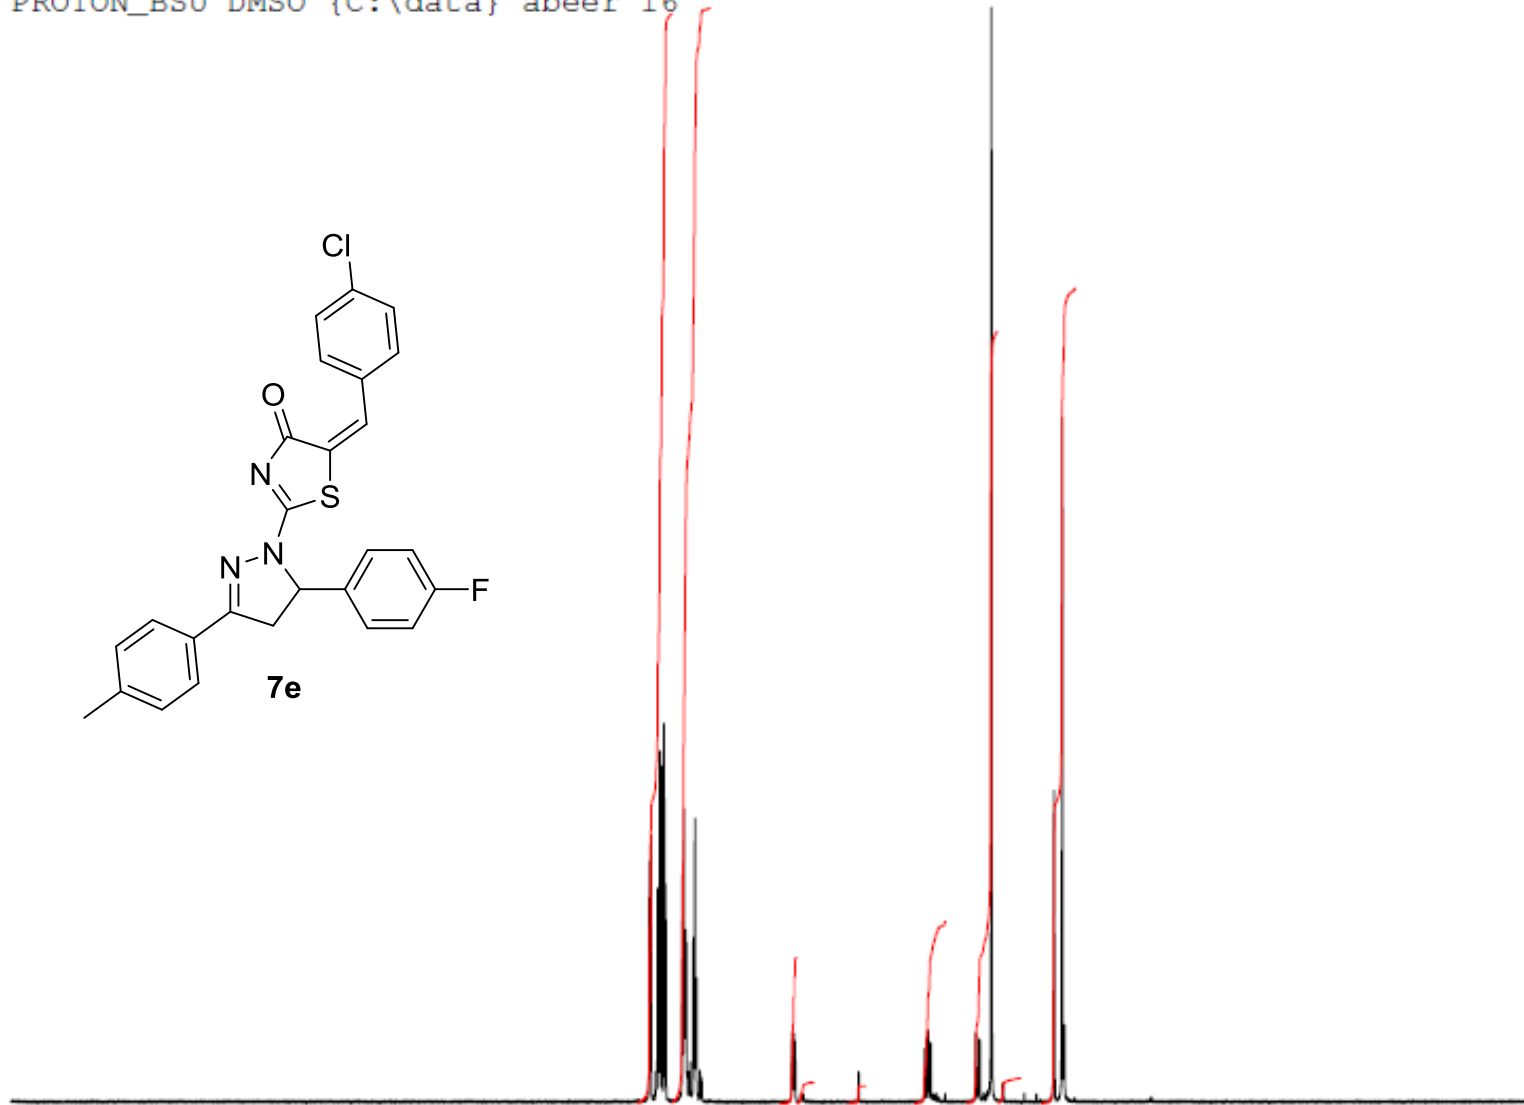

15 14 13 12 11 10 9 8 7 6 5 4 3 2 1 0 -1 -2 ppm

26.17  
26.31  
3.52  
0.50  
0.41  
4.37  
18.54  
0.61  
19.57

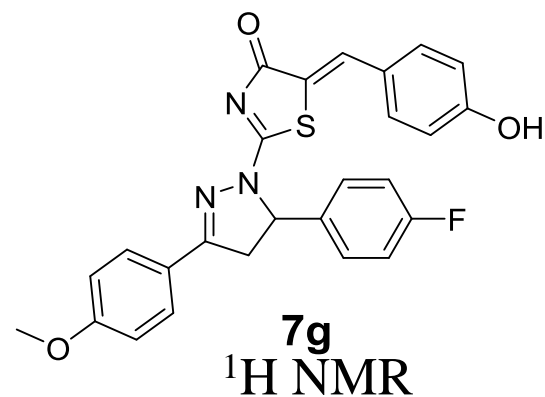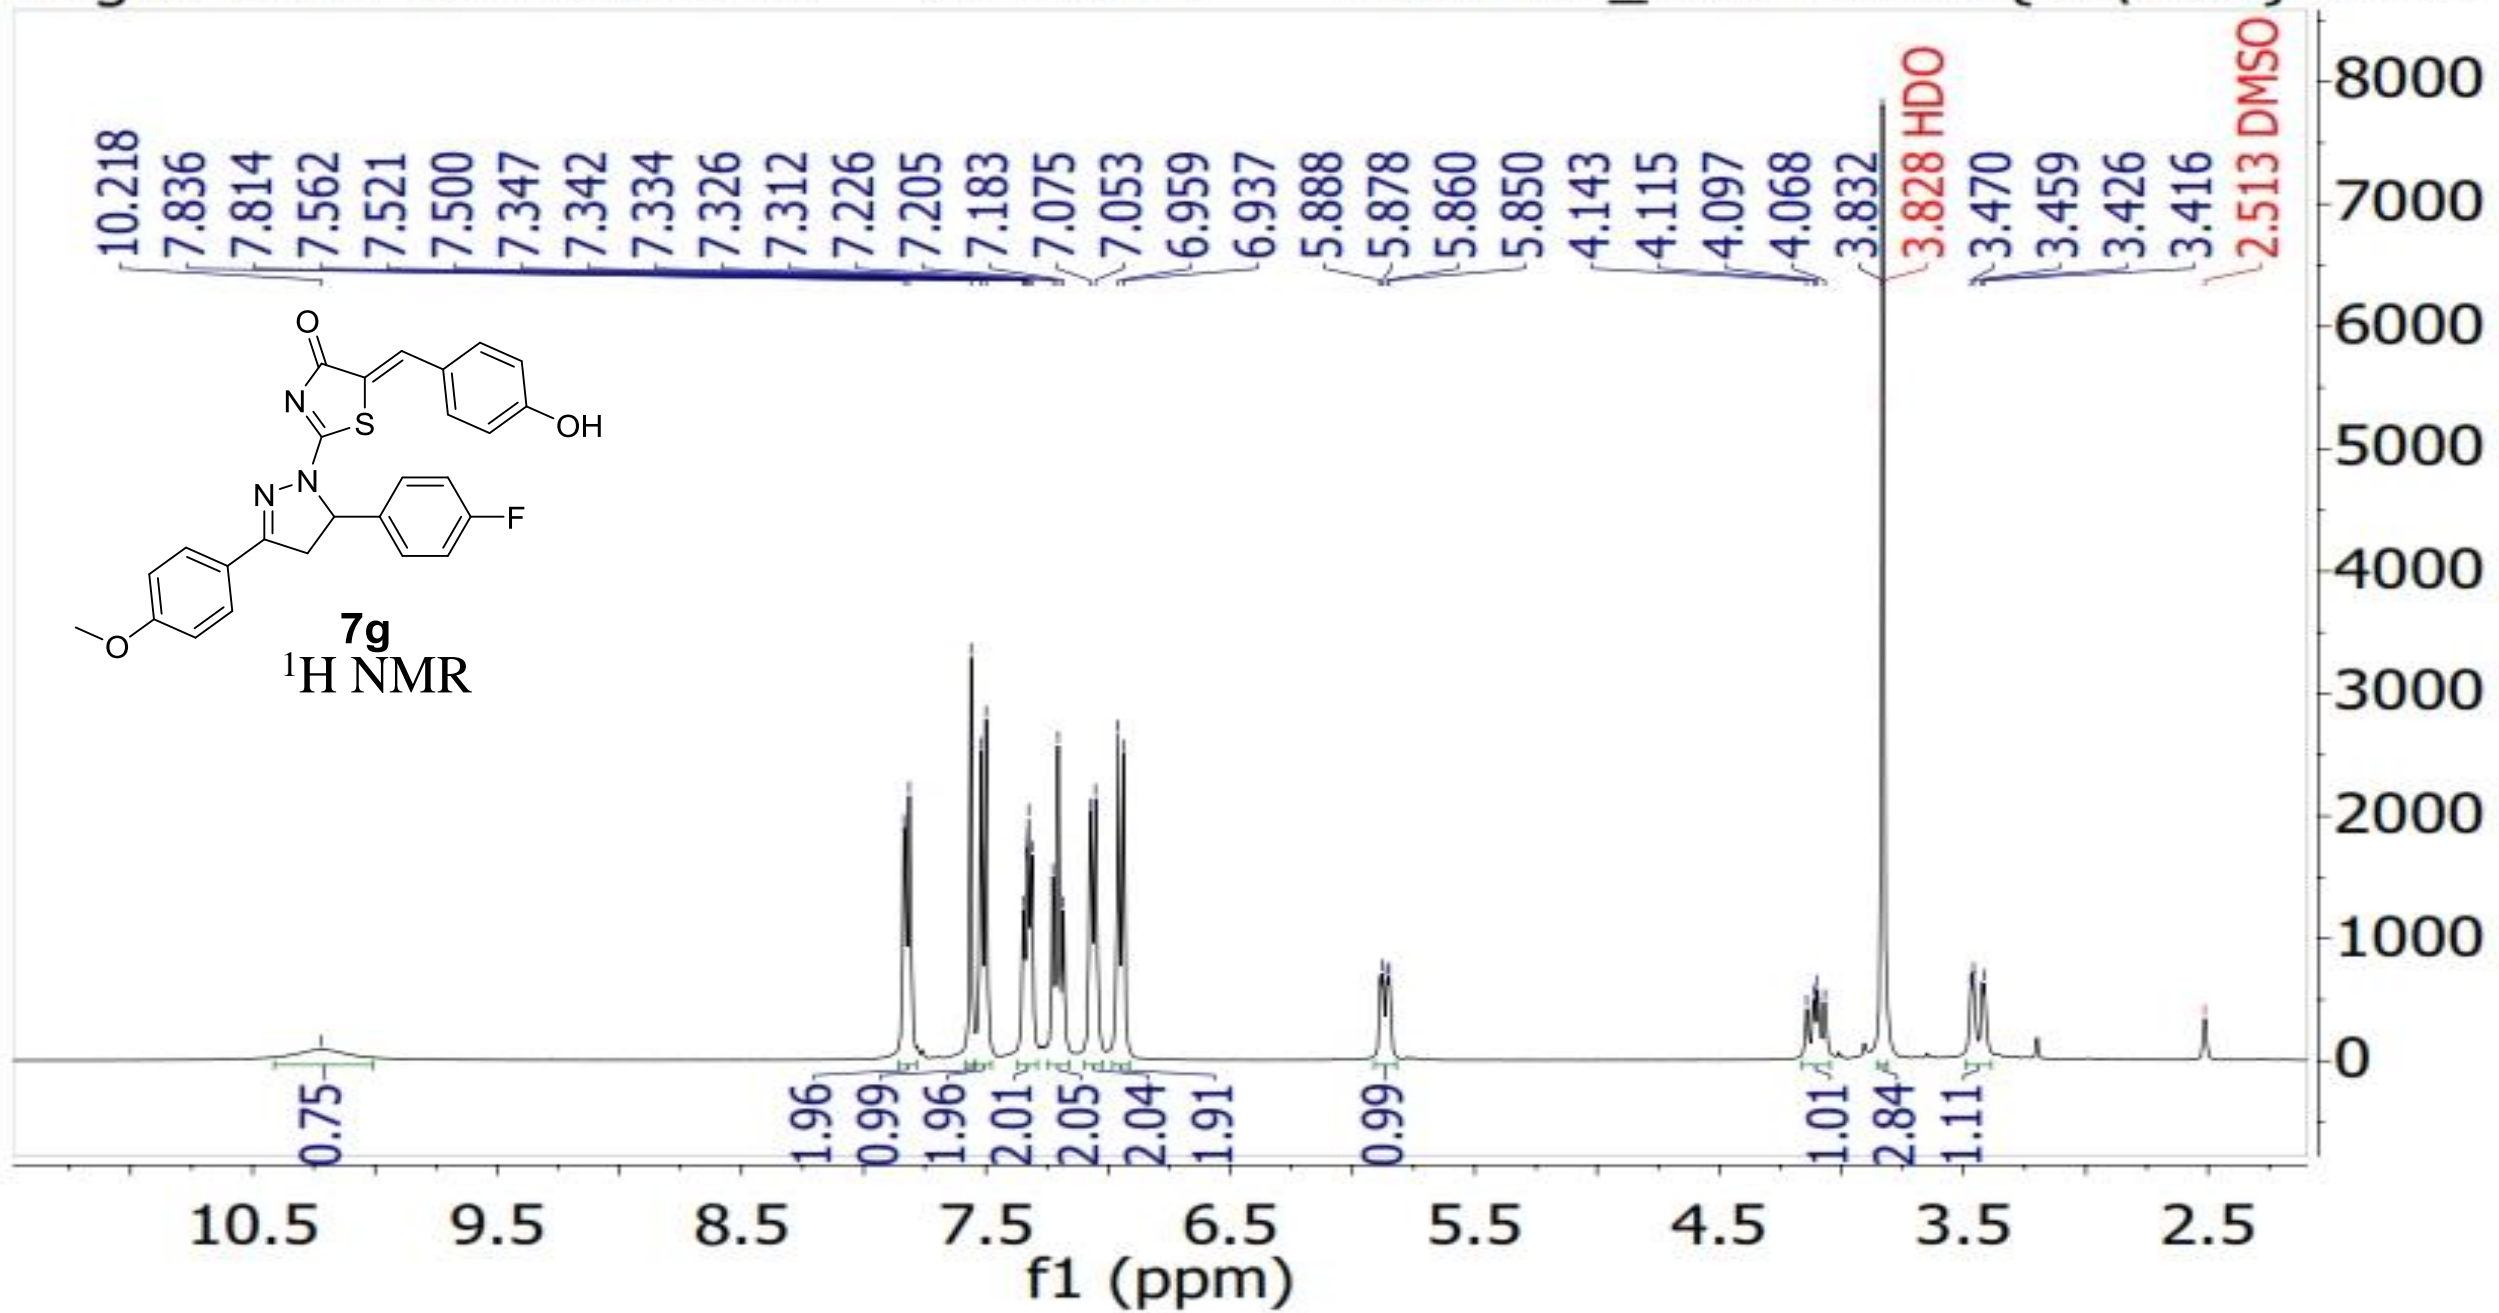

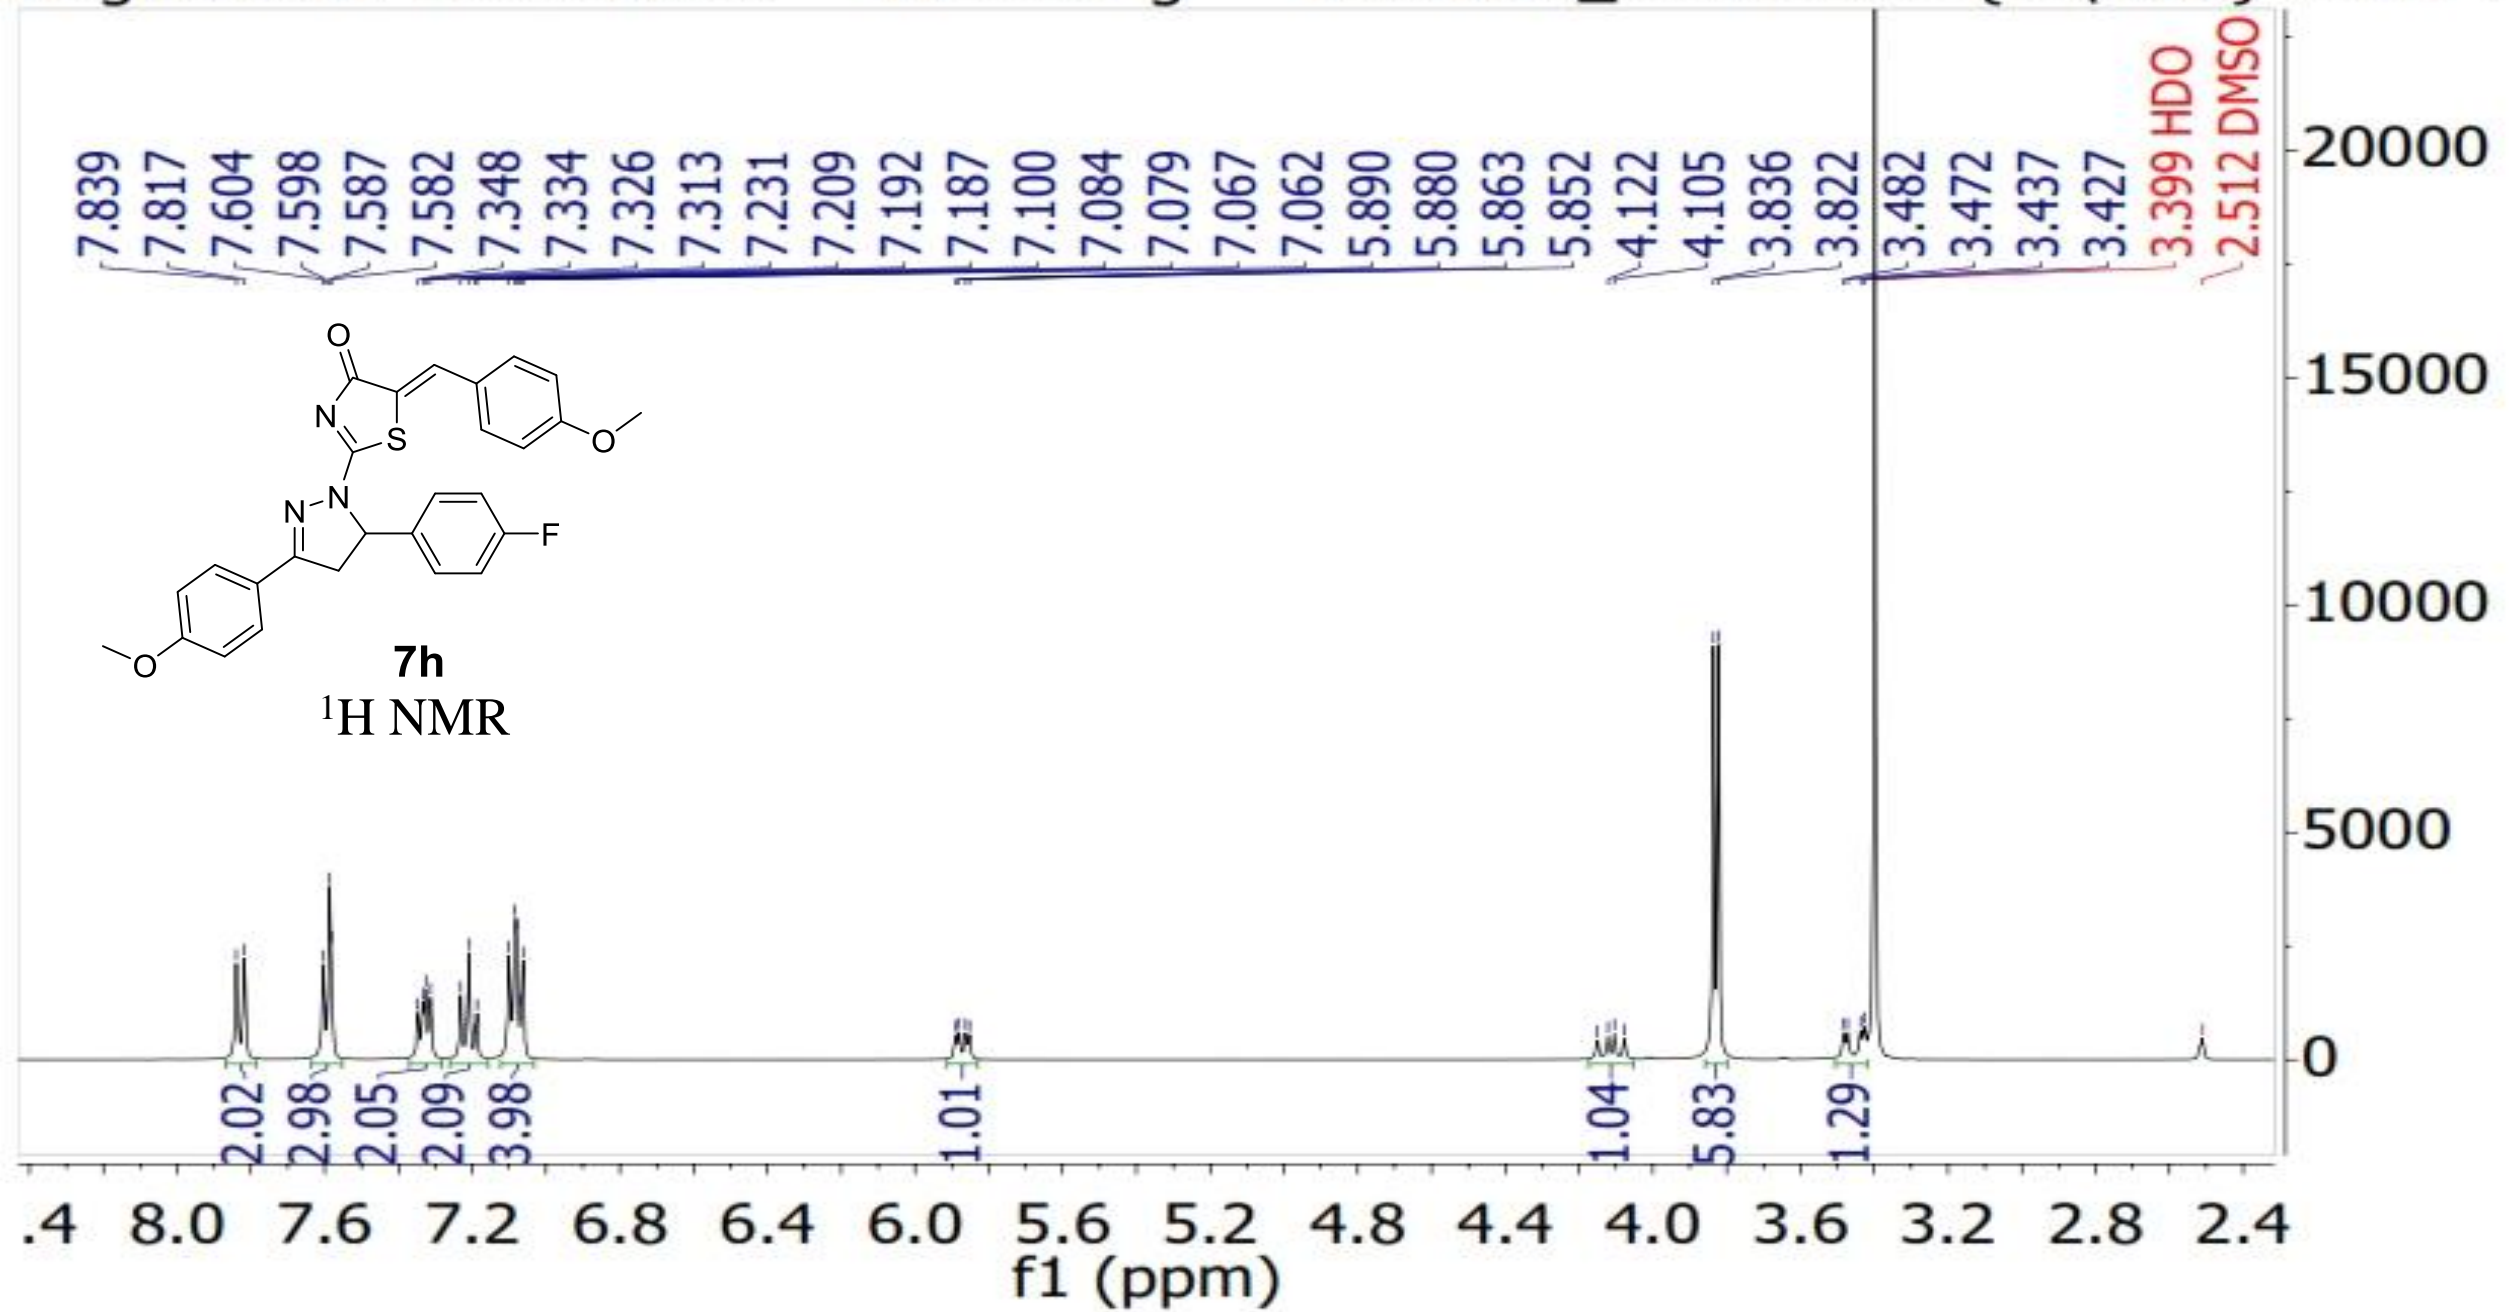



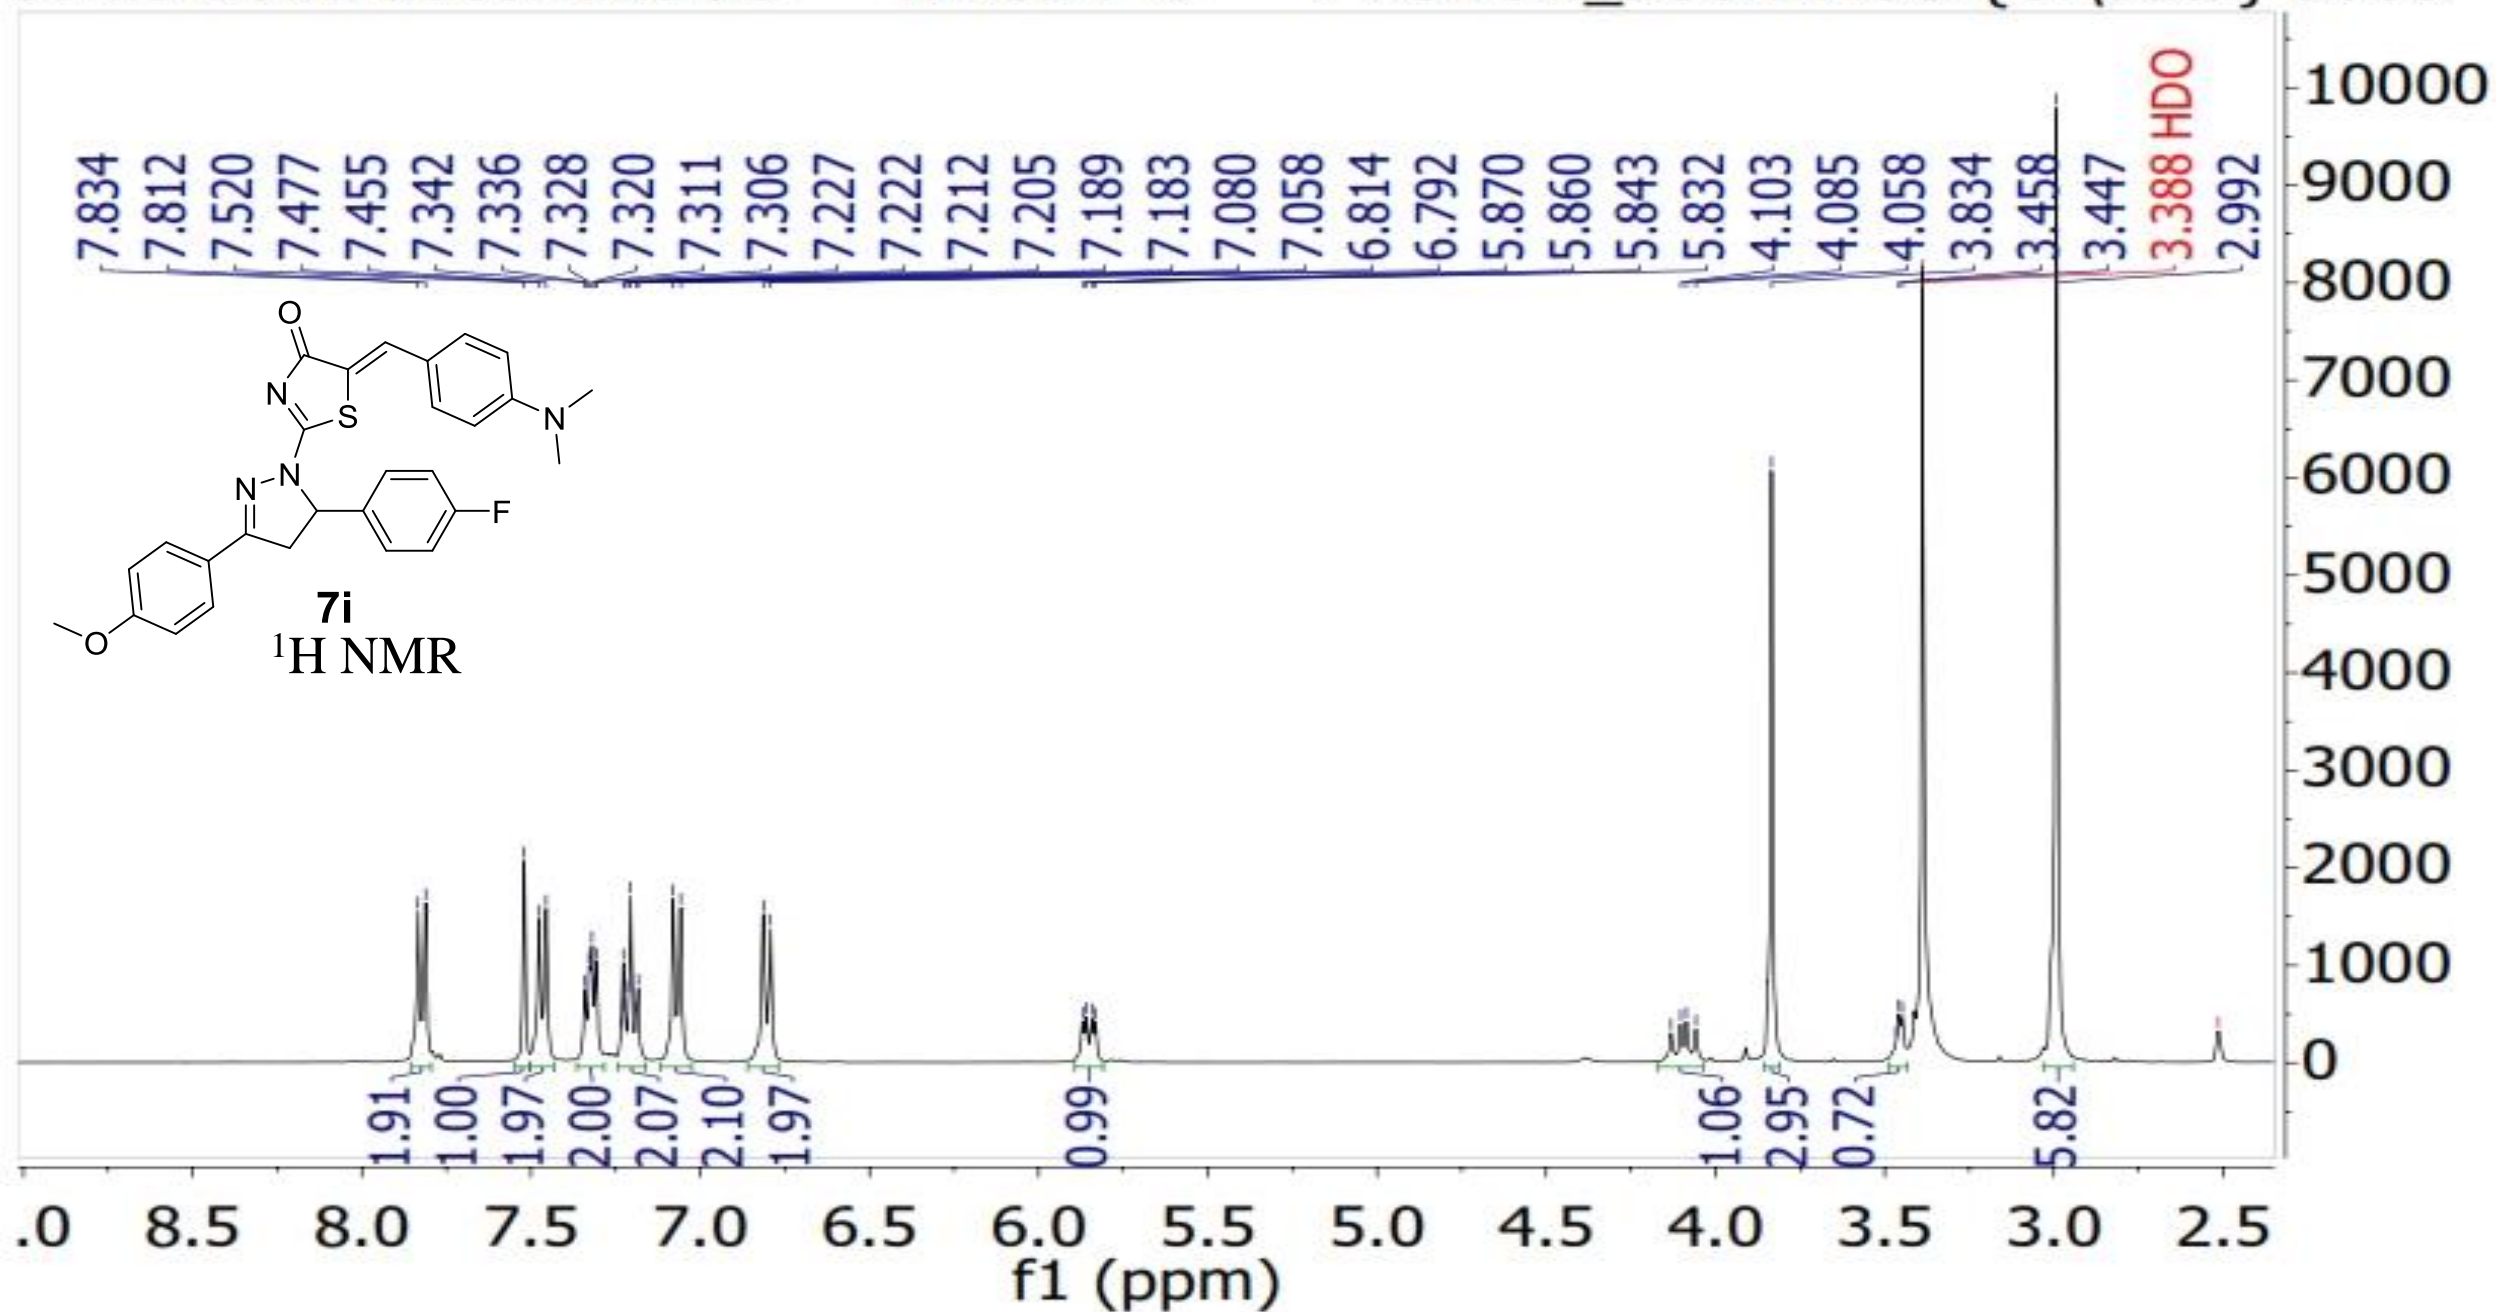



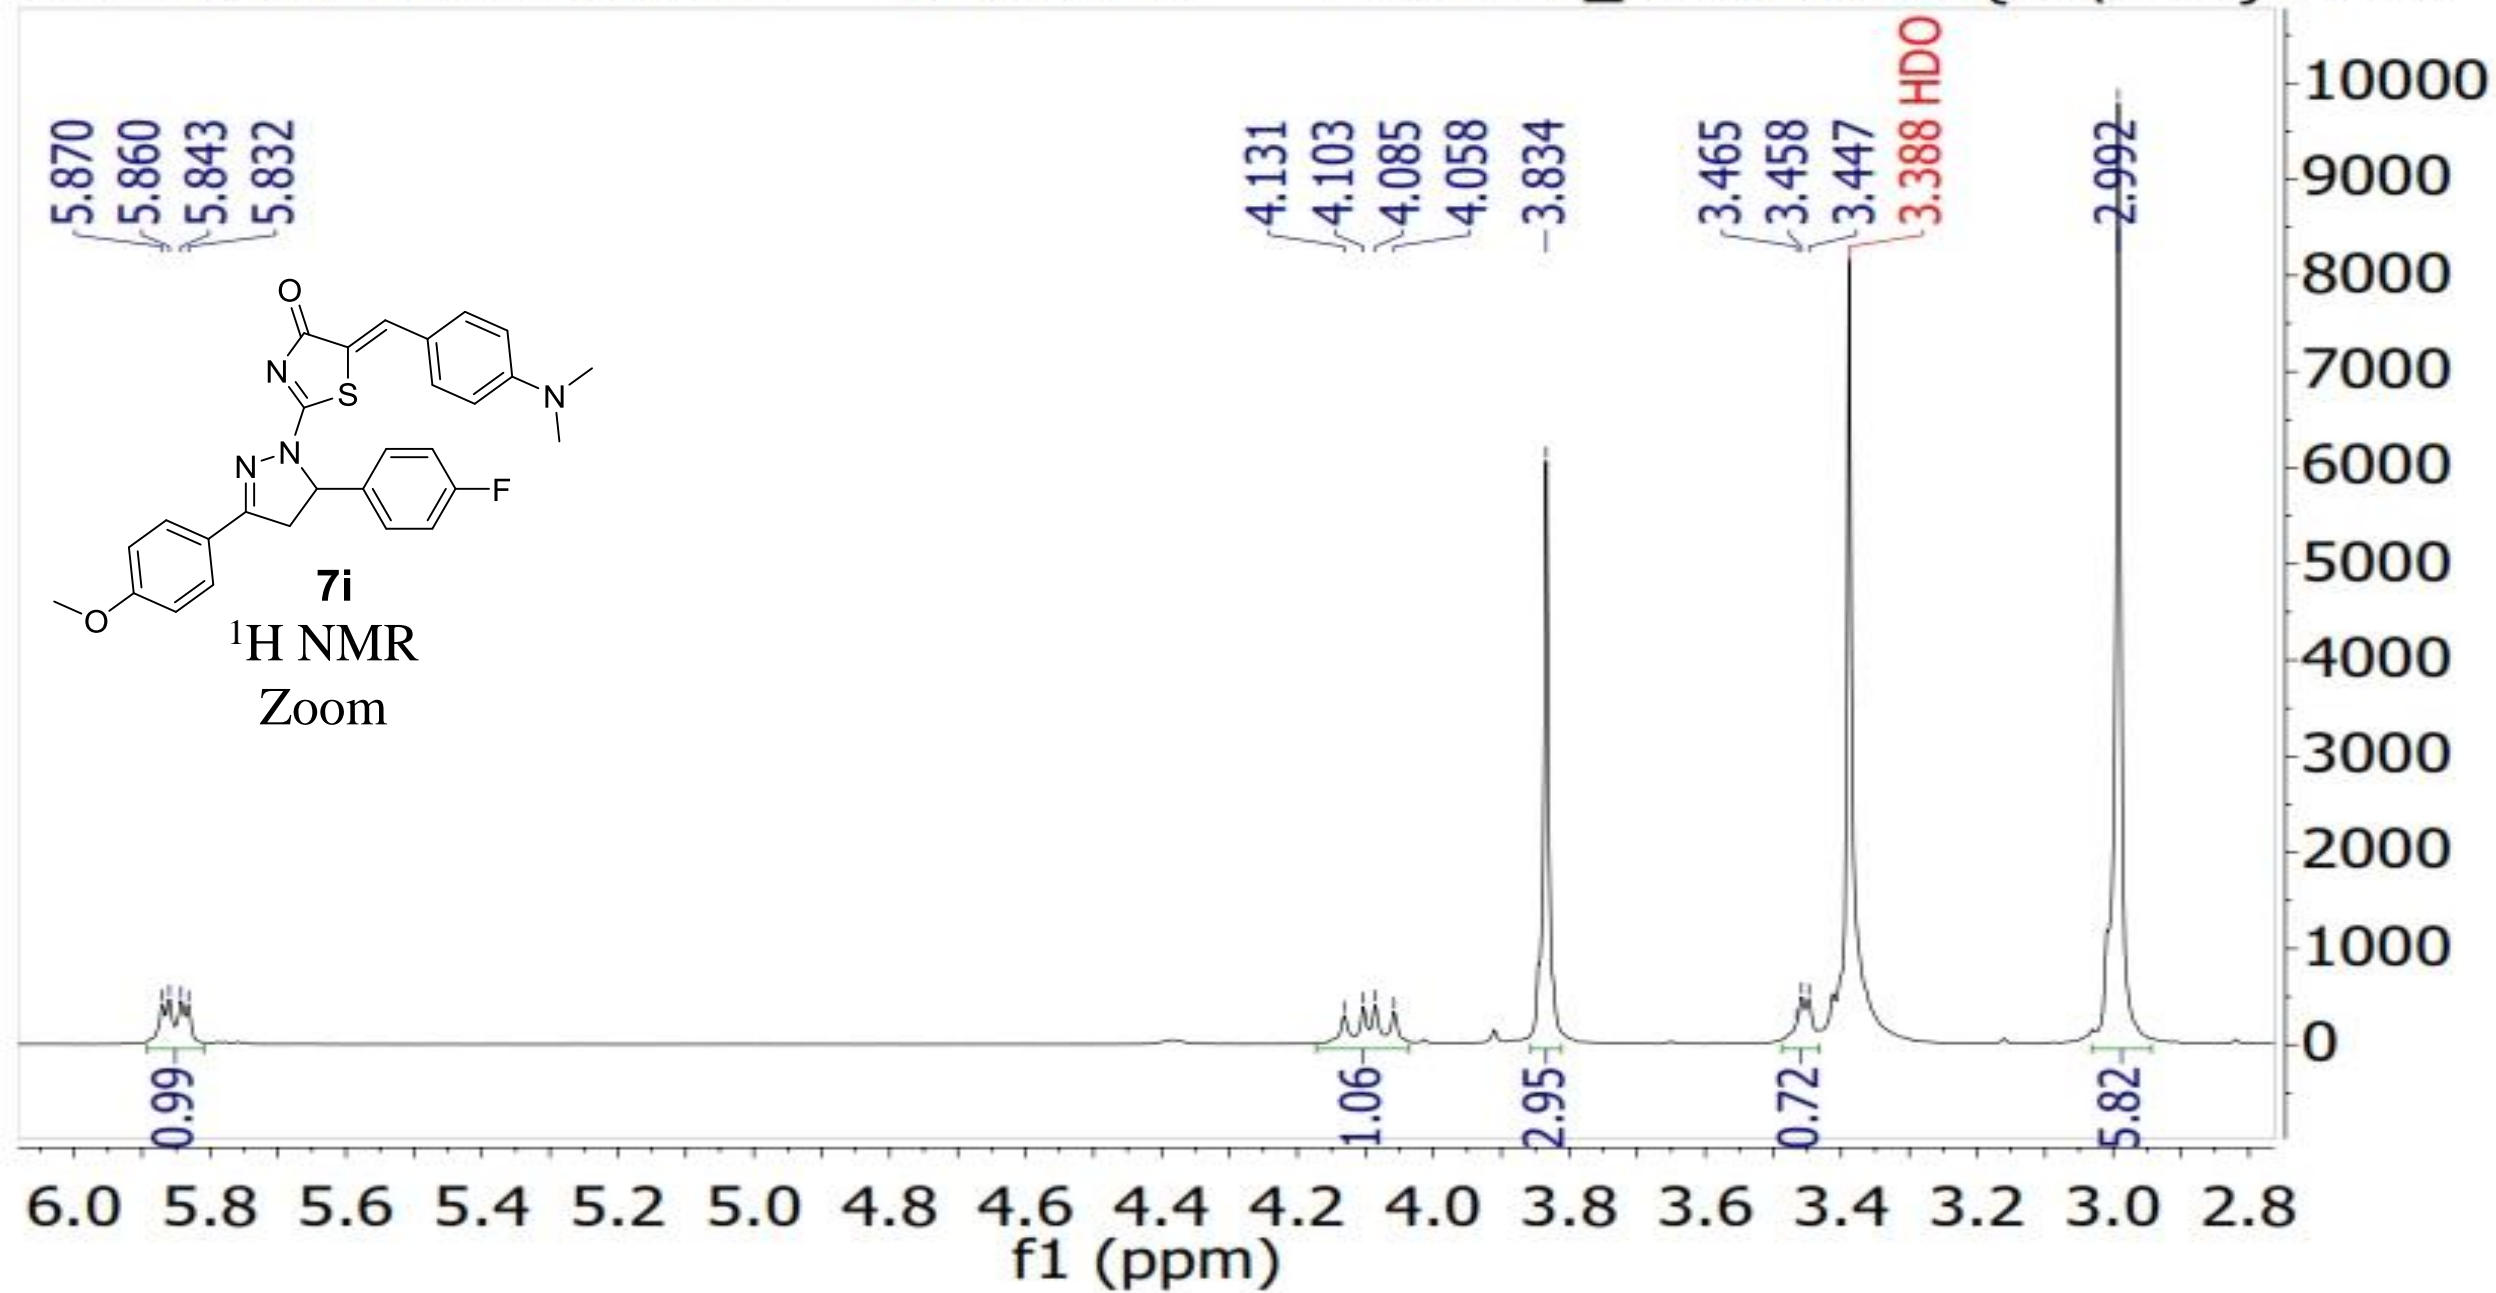

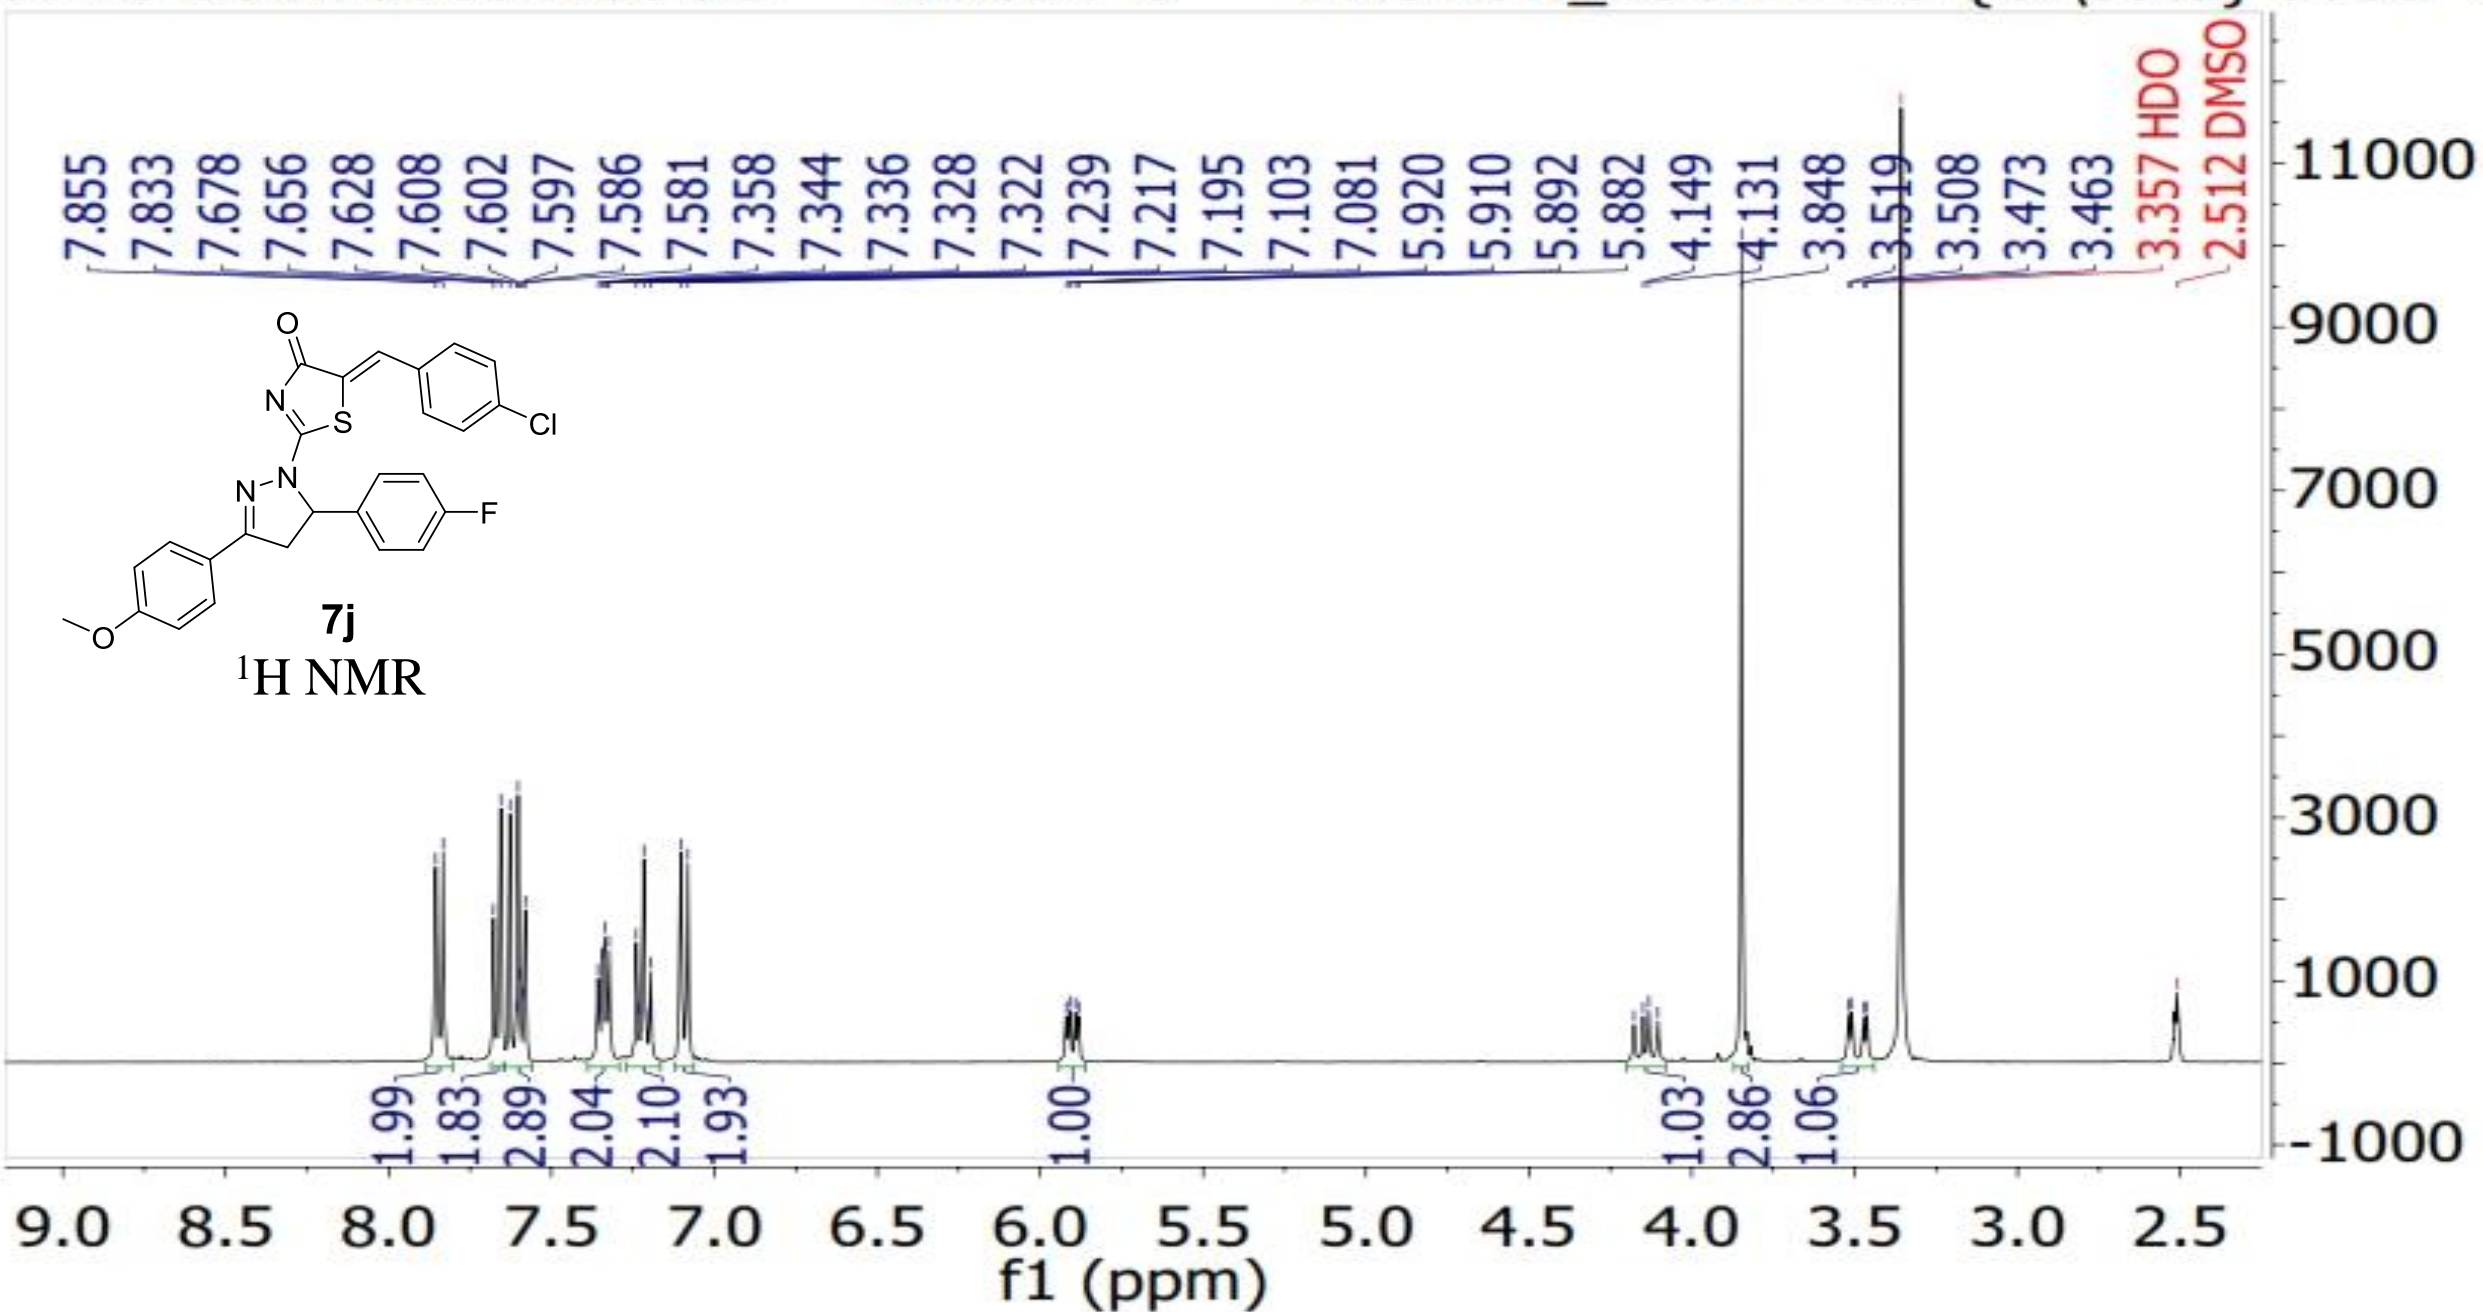

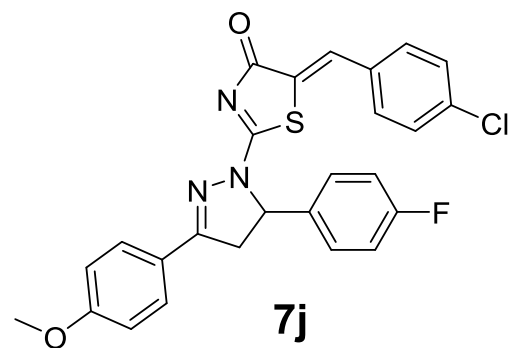

<sup>1</sup>H NMR  
Zoom

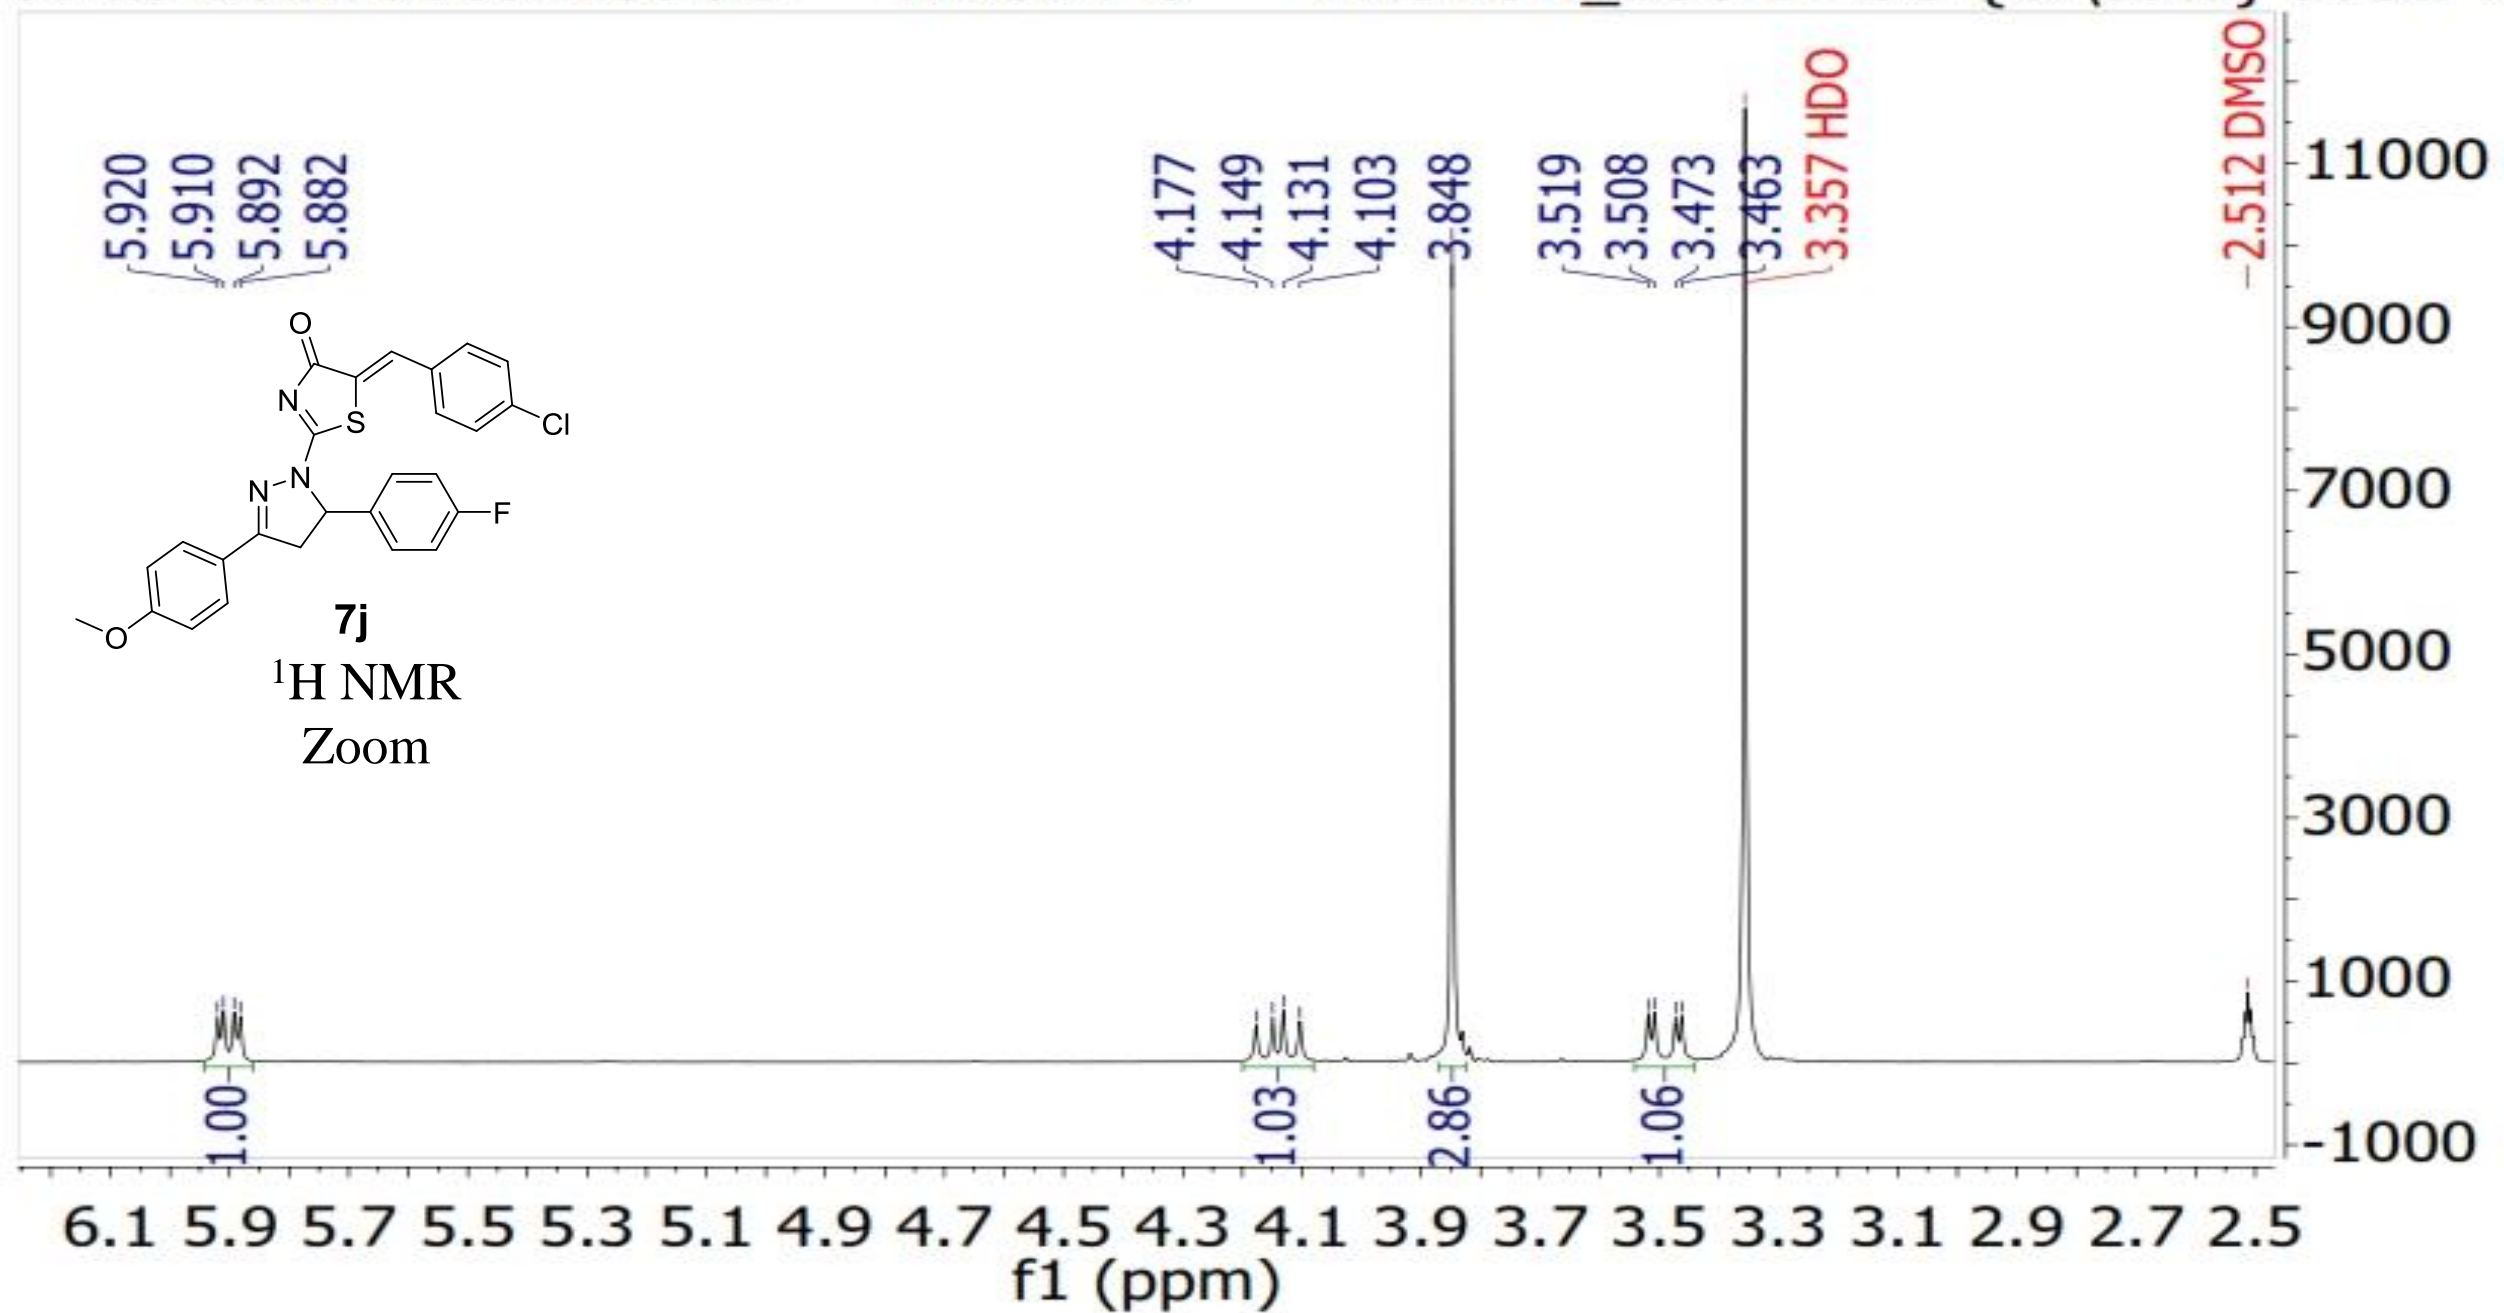



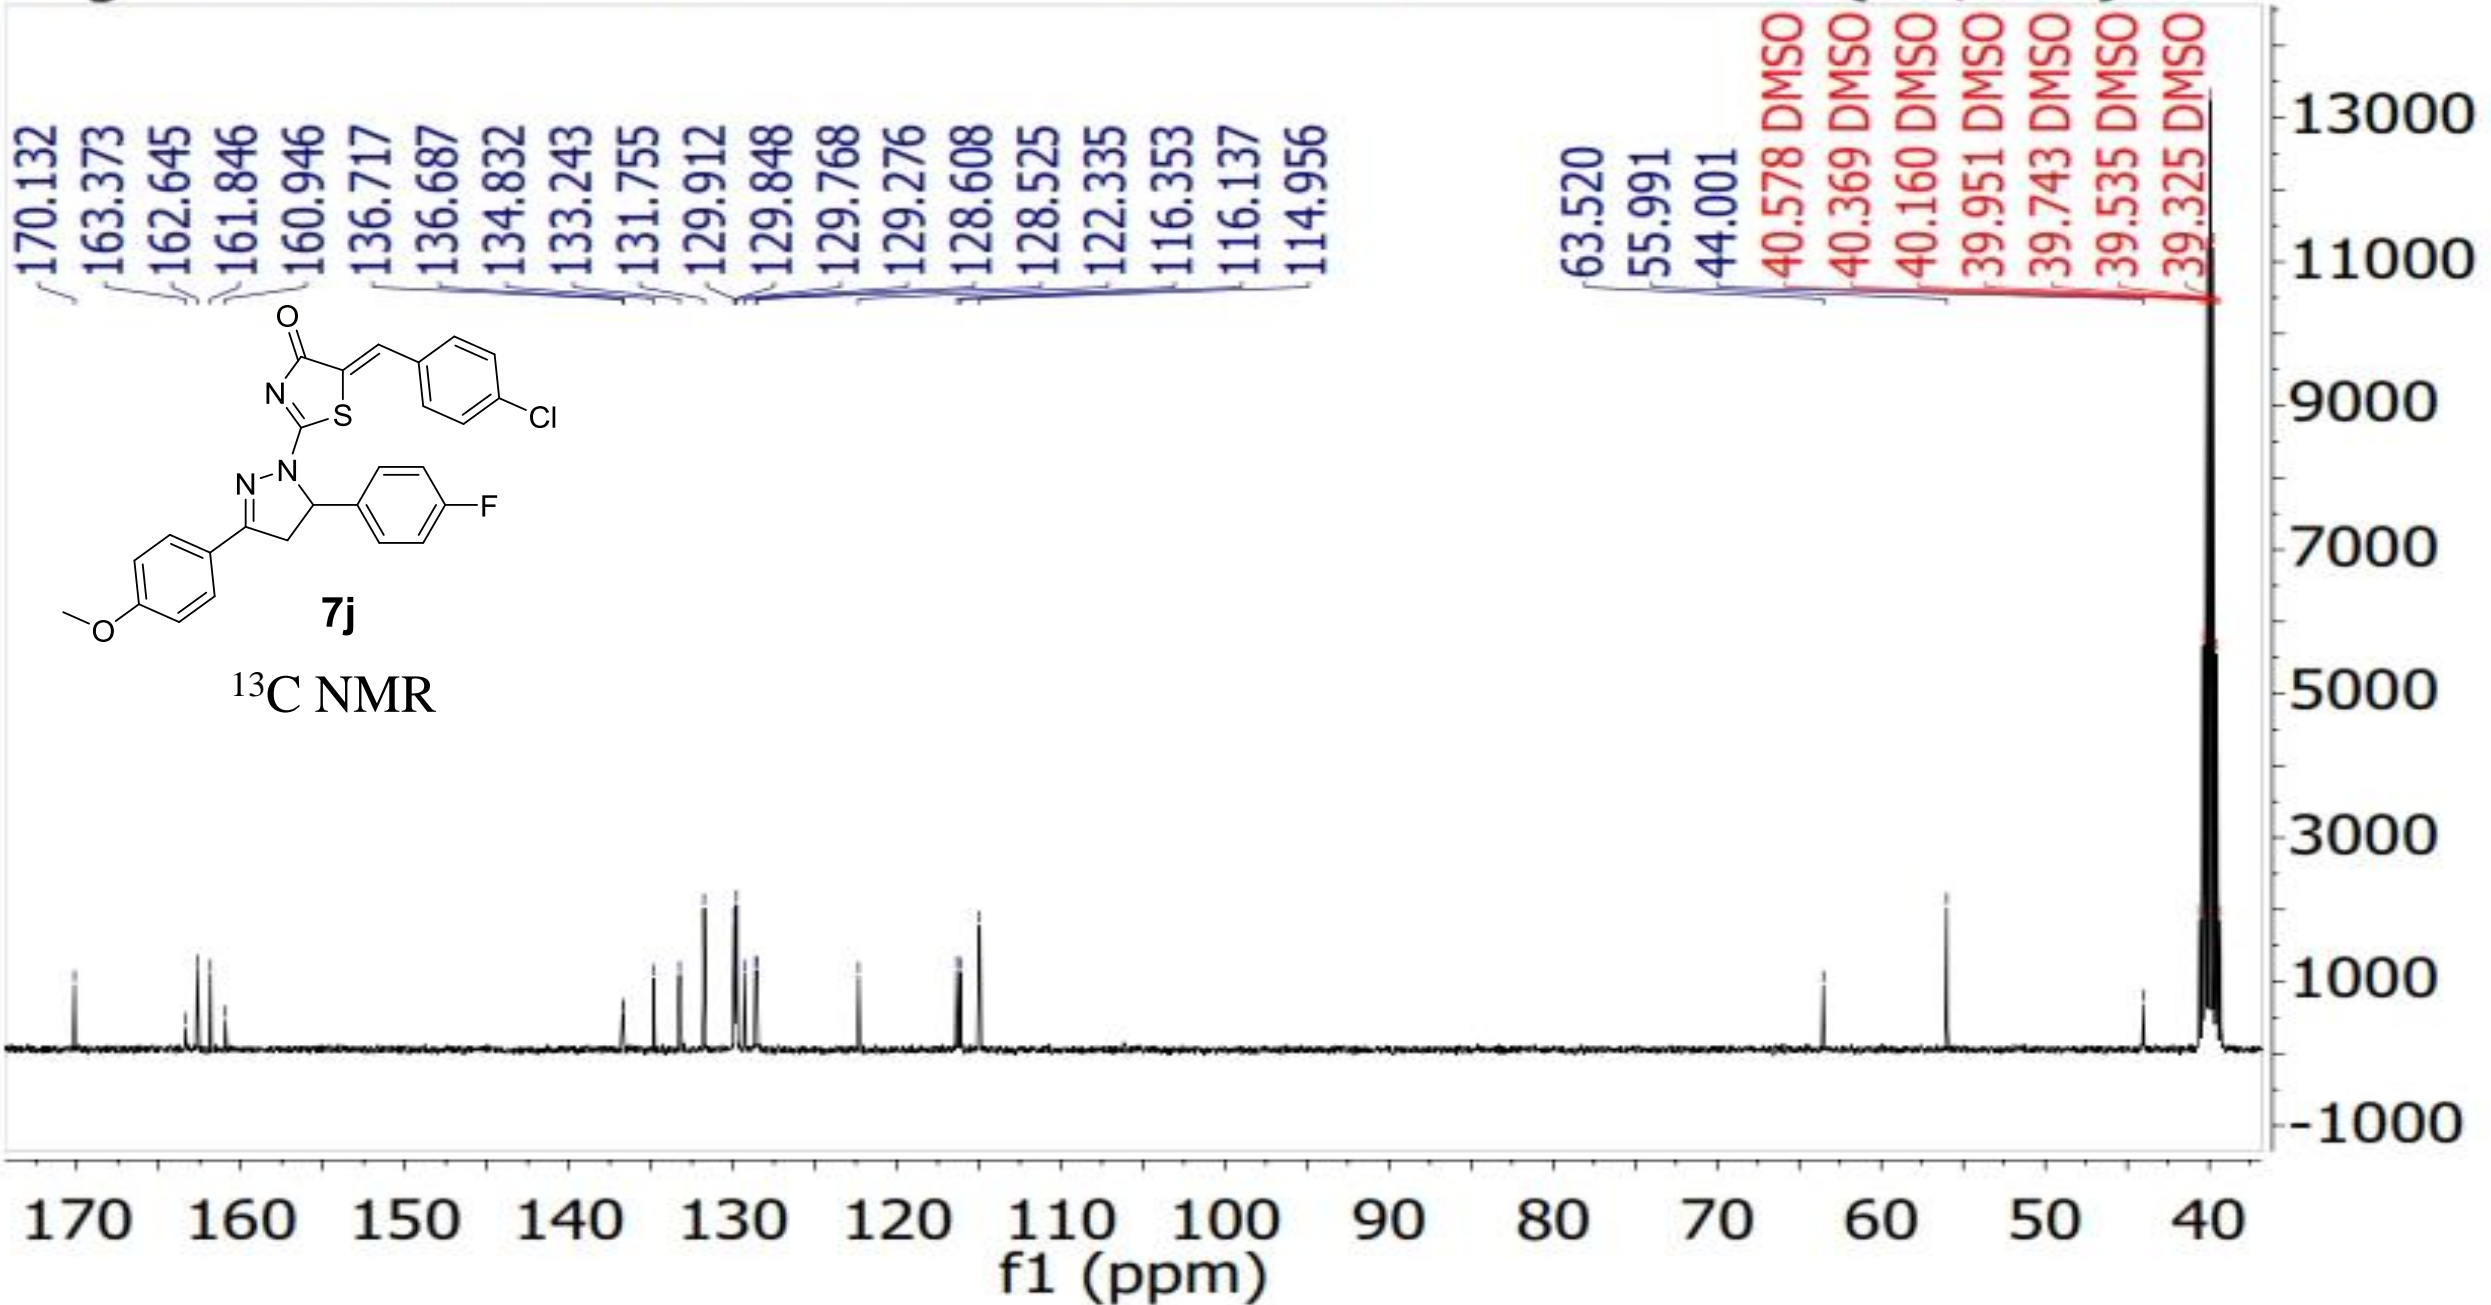

wagdy-k  
PROTON\_BSU DMSO (C:\data) abeer 16

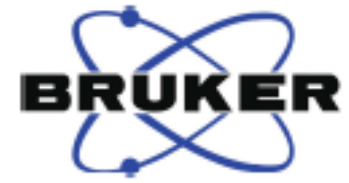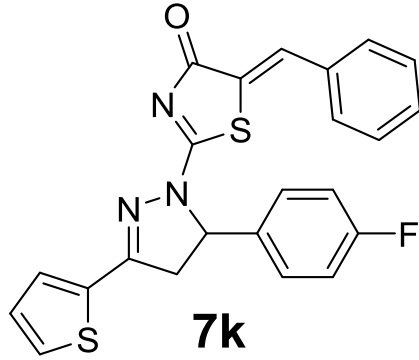

Current Data Parameters  
NAME Aug08-2021-abear  
EXPNO 90  
PROCNO 1

F2 - Acquisition Parameters  
Data\_ 20210808  
Time 11.08  
INSTRUM spect  
PROBHD 5 mm PABBO BB/  
PULPROG zg30  
TD 65536  
SOLVENT DMSO  
NS 16  
DS 2  
SWH 8012.820 Hz  
FIDRES 0.122266 Hz  
AQ 4.0894465 sec  
RG 147.93  
DW 62.400 usec  
DE 6.50 usec  
TE 299.0 K  
D1 1.00000000 sec  
TD0 1

==== CHANNEL f1 =====  
SFO1 400.1324710 MHz  
NUC1 1H  
P1 10.00 usec  
PLW1 16.00000000 W

F2 - Processing parameters  
SI 65536  
SF 400.1300000 MHz  
WDW EM  
SSB 0  
LB 0.10 Hz  
GB 0  
PC 1.00

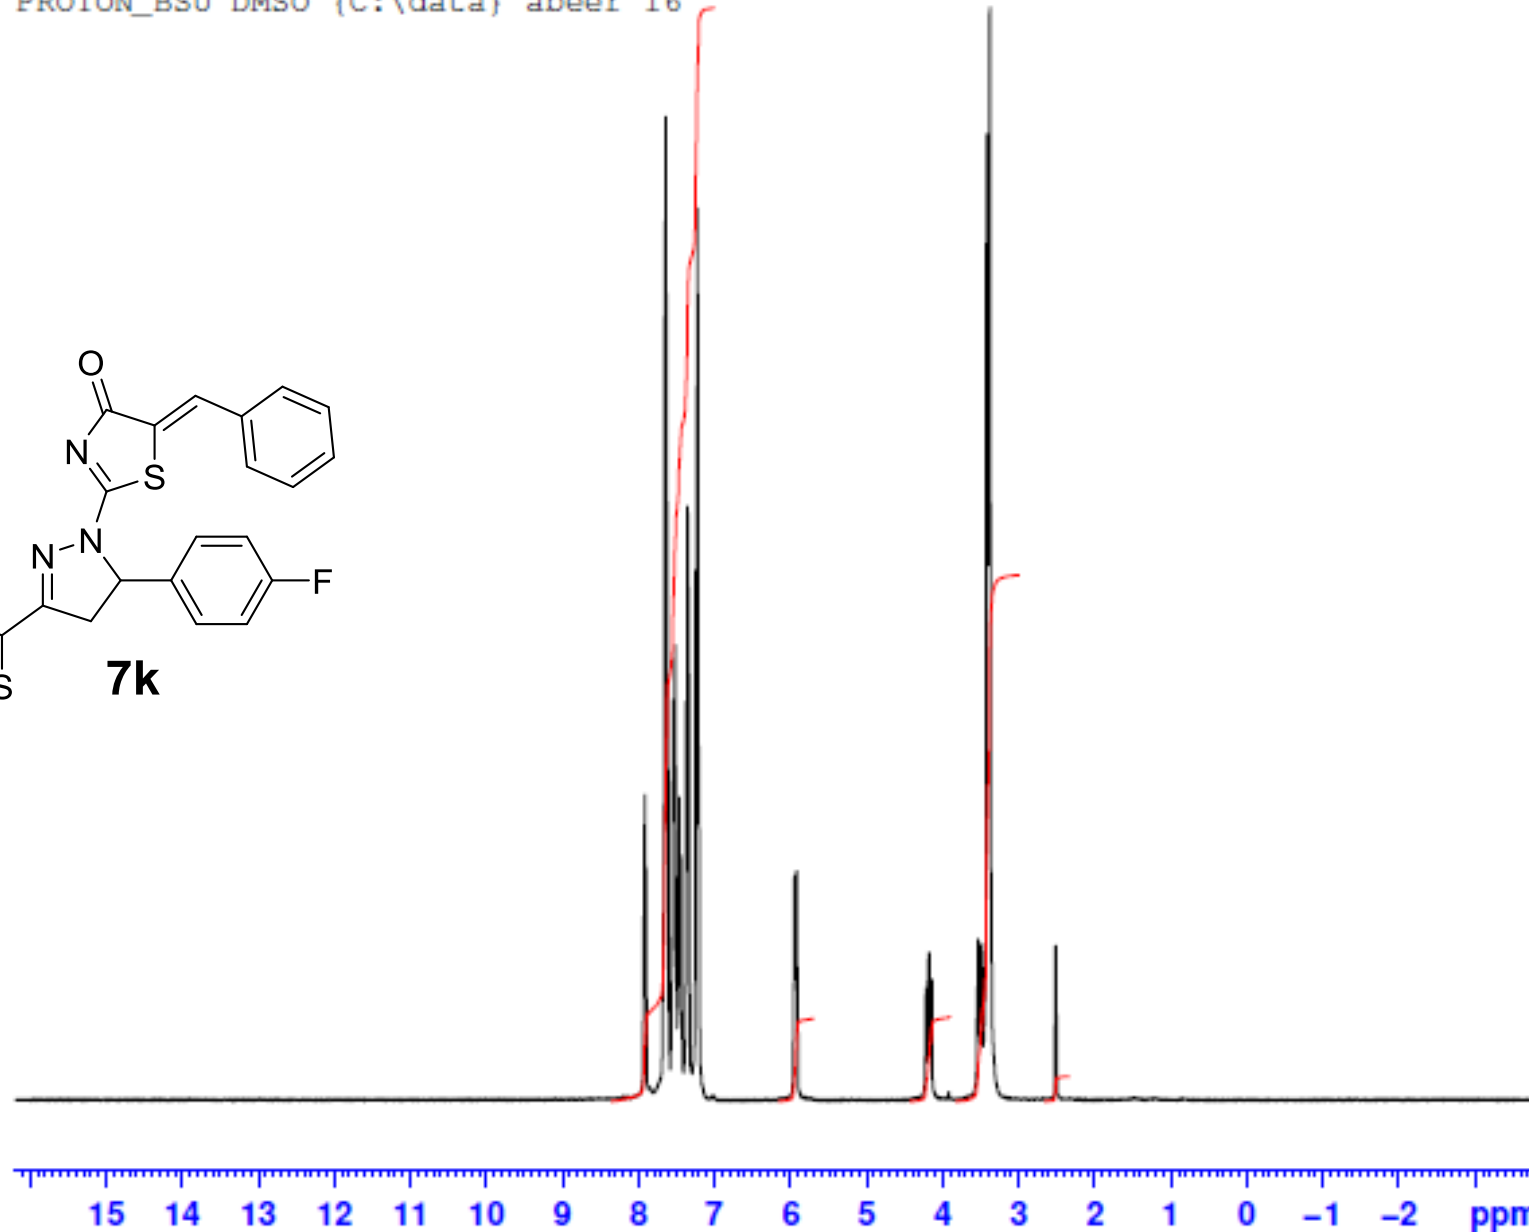

15 14 13 12 11 10 9 8 7 6 5 4 3 2 1 0 -1 -2 ppm

60.36

4.56

4.67

29.05

1.37

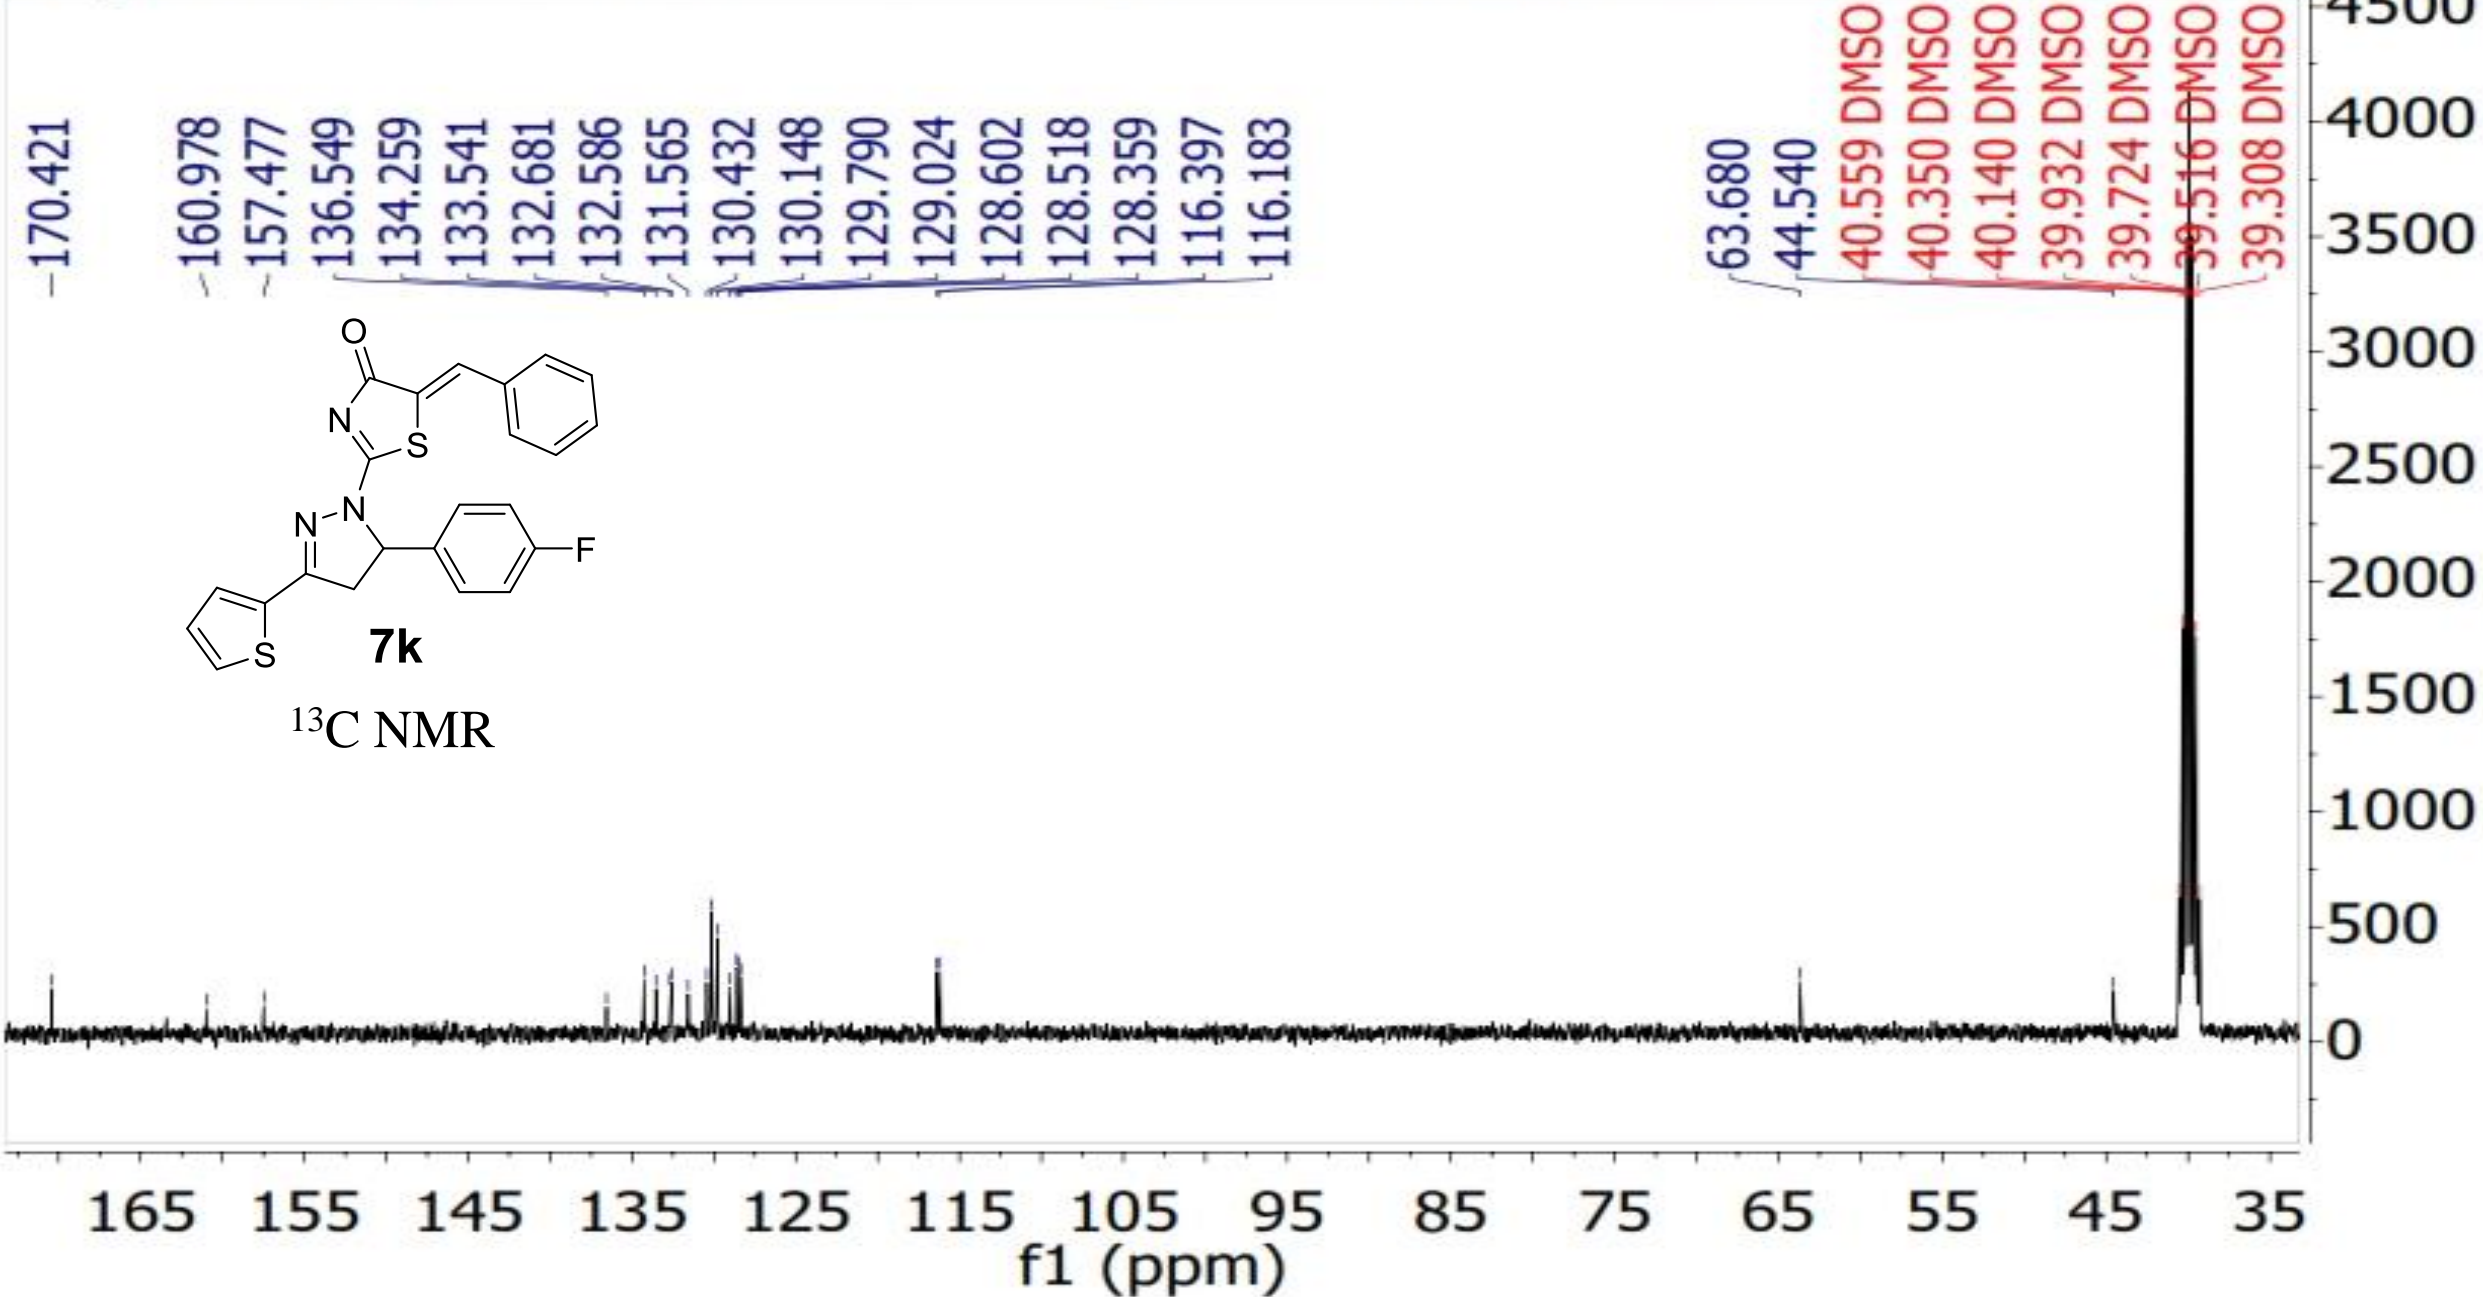

wagdy-1  
PROTON\_BSU DMSO (C:\data) aber 8

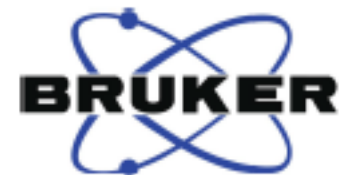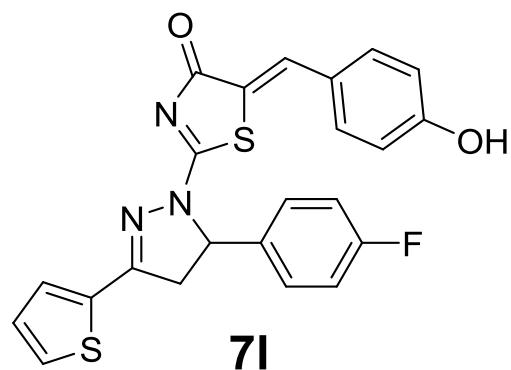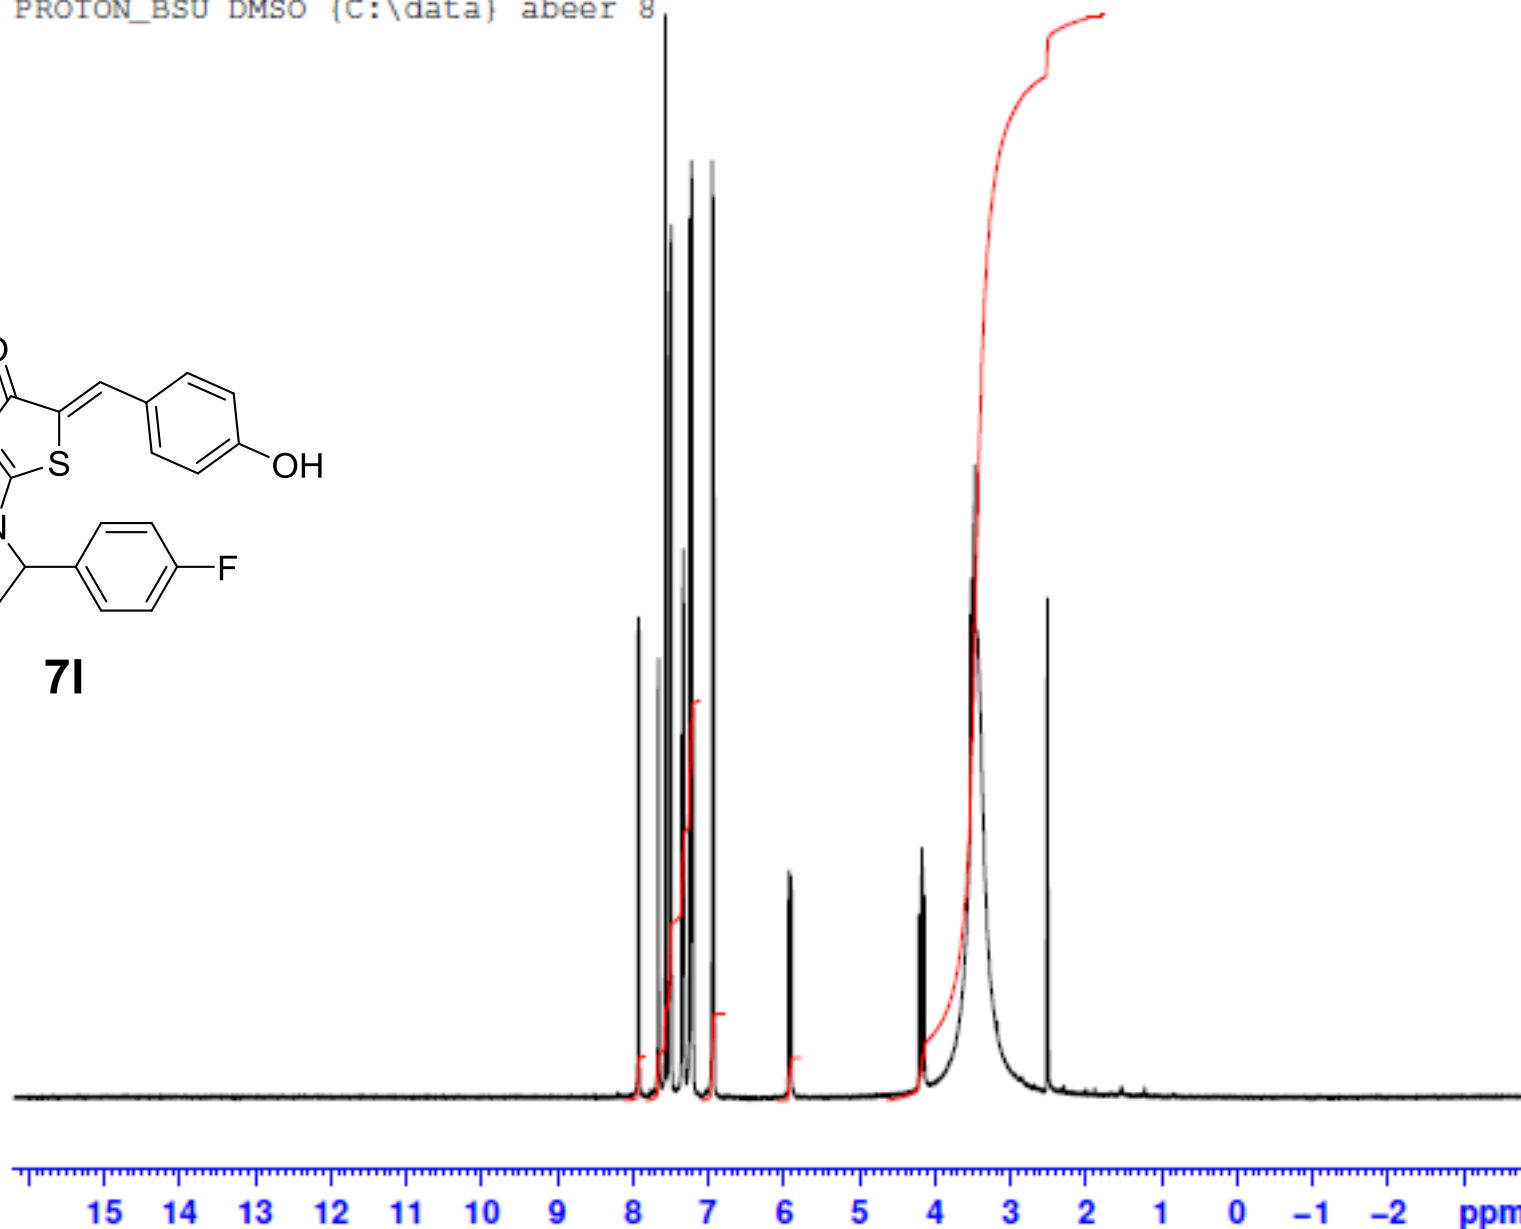

Current Data Parameters  
NAME Aug08-2021-aber  
EXPNO 10  
PROCNO 1

F2 - Acquisition Parameters  
Date\_ 20210808  
Time 10.36  
INSTRUM spect  
PROBHD 5 mm PABBO BB/  
PULPROG zg30  
TD 65536  
SOLVENT DMSO  
NS 16  
DS 2  
SWH 8012.820 Hz  
FIDRES 0.122266 Hz  
AQ 4.0894465 sec  
RG 147.93  
DW 62.400 usec  
DE 6.50 usec  
TE 296.0 K  
D1 1.00000000 sec  
TDO 1

==== CHANNEL f1 =====  
SFO1 400.1324710 MHz  
NUC1 1H  
P1 10.00 usec  
PLW1 16.00000000 W

F2 - Processing parameters  
SI 65536  
SF 400.1300000 MHz  
WDW EM  
SSB 0  
LB 0.10 Hz  
GB 0  
PC 1.00



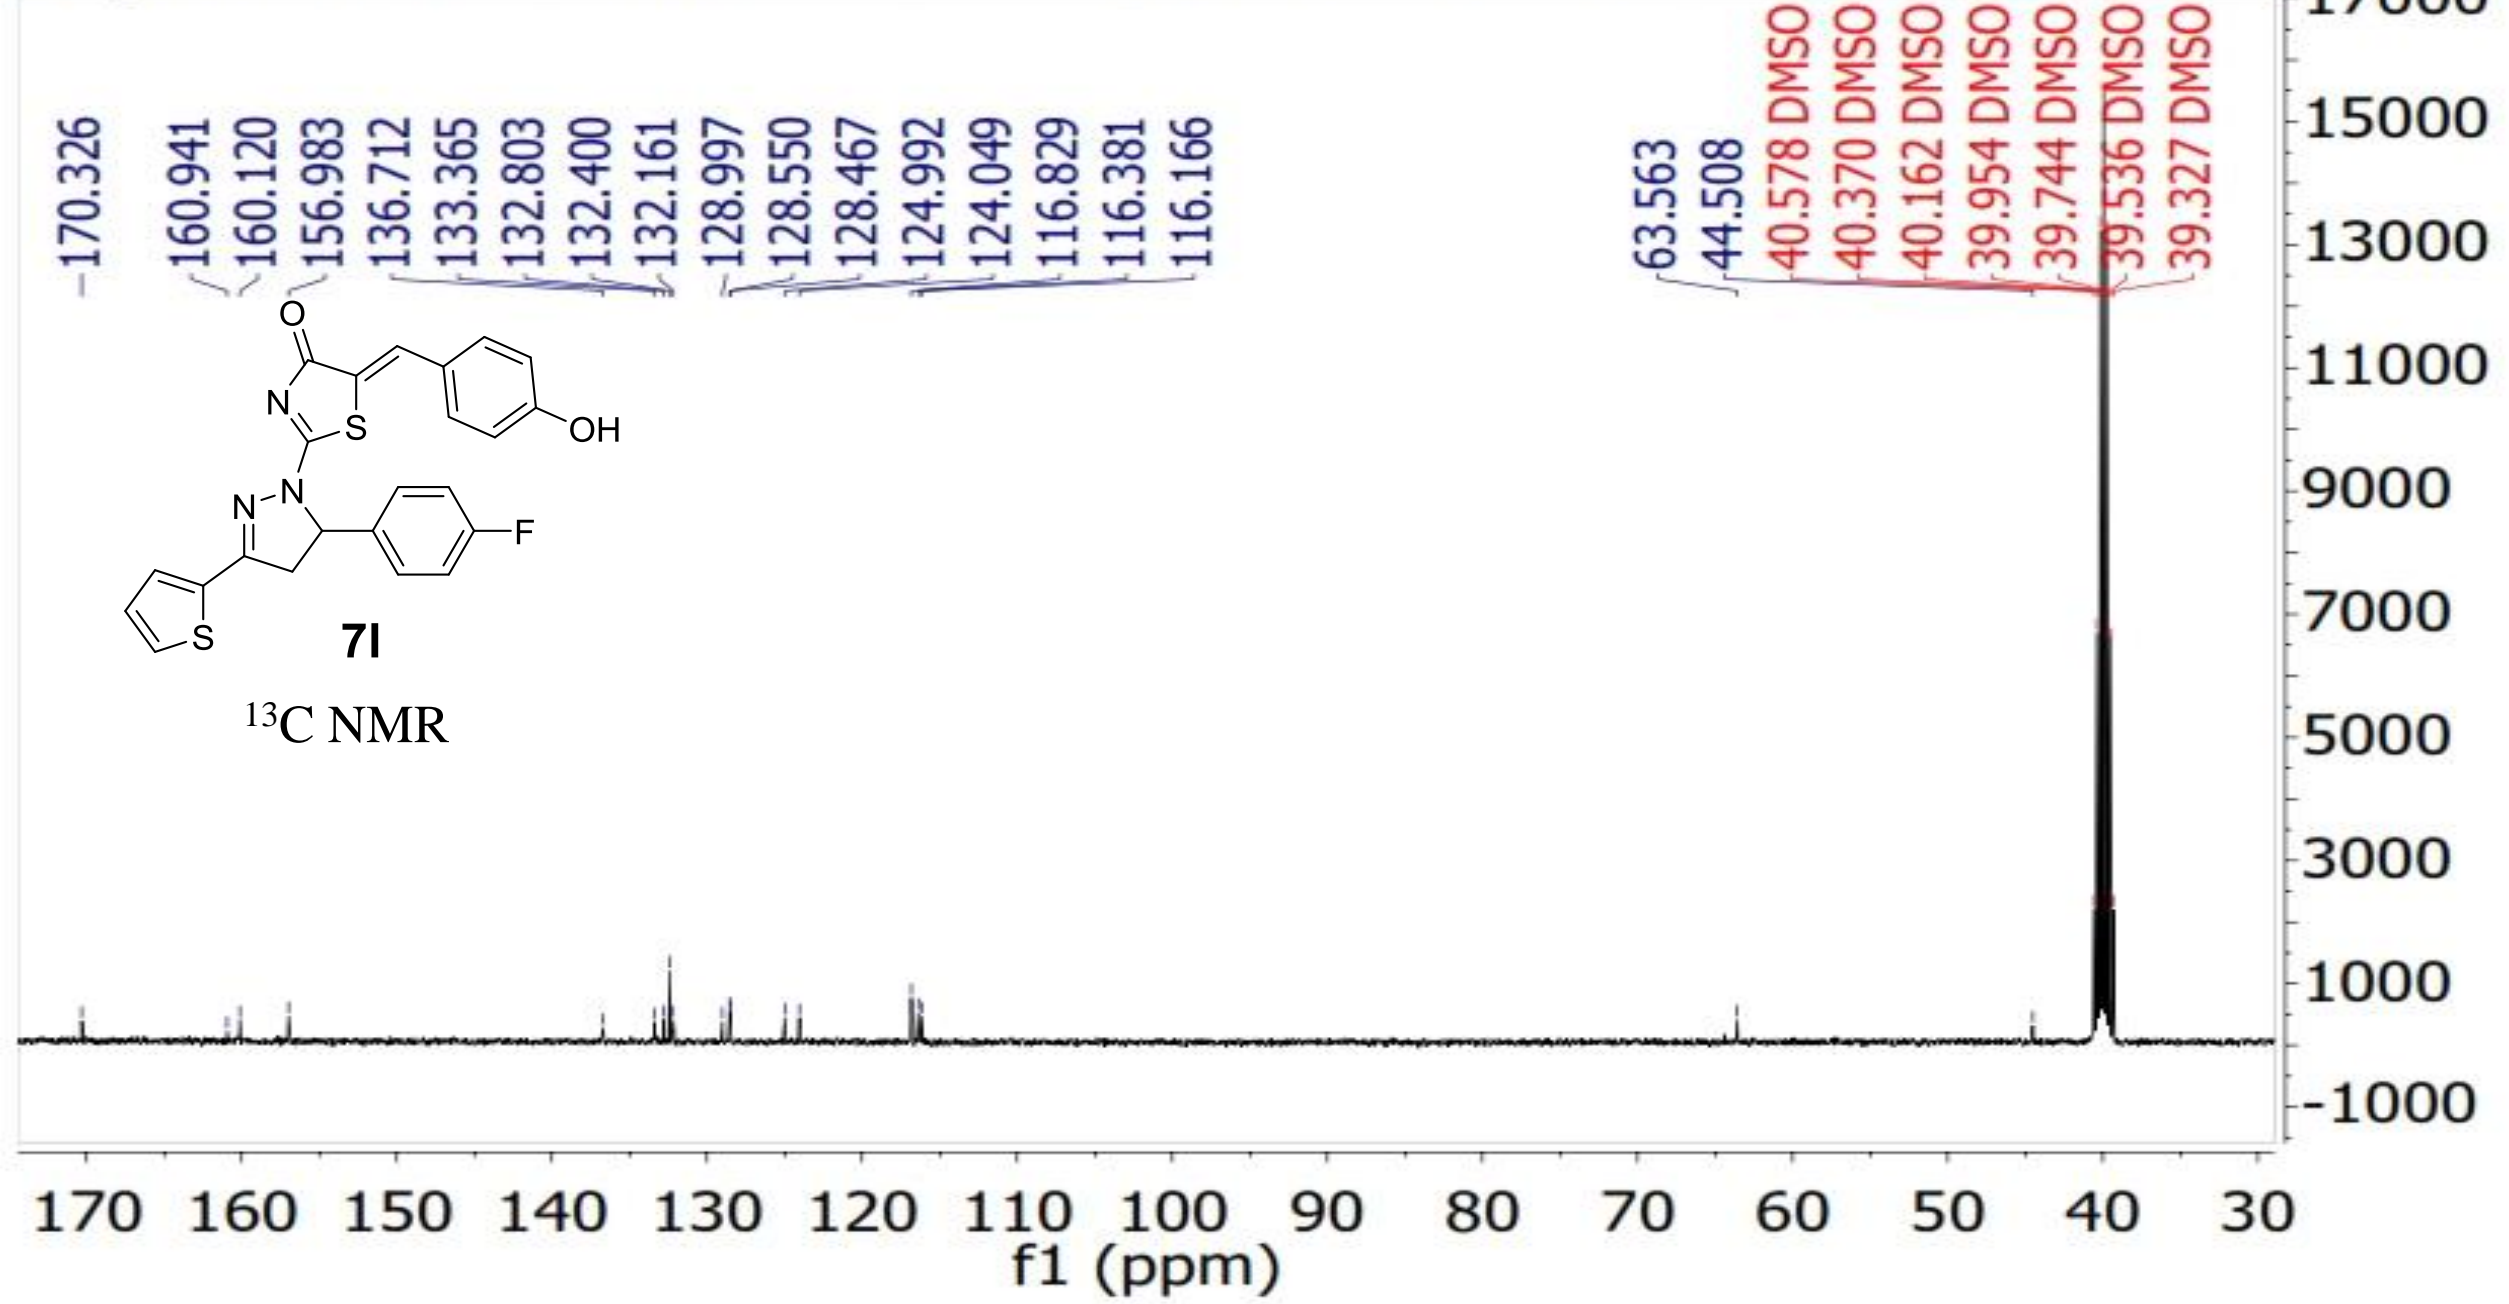



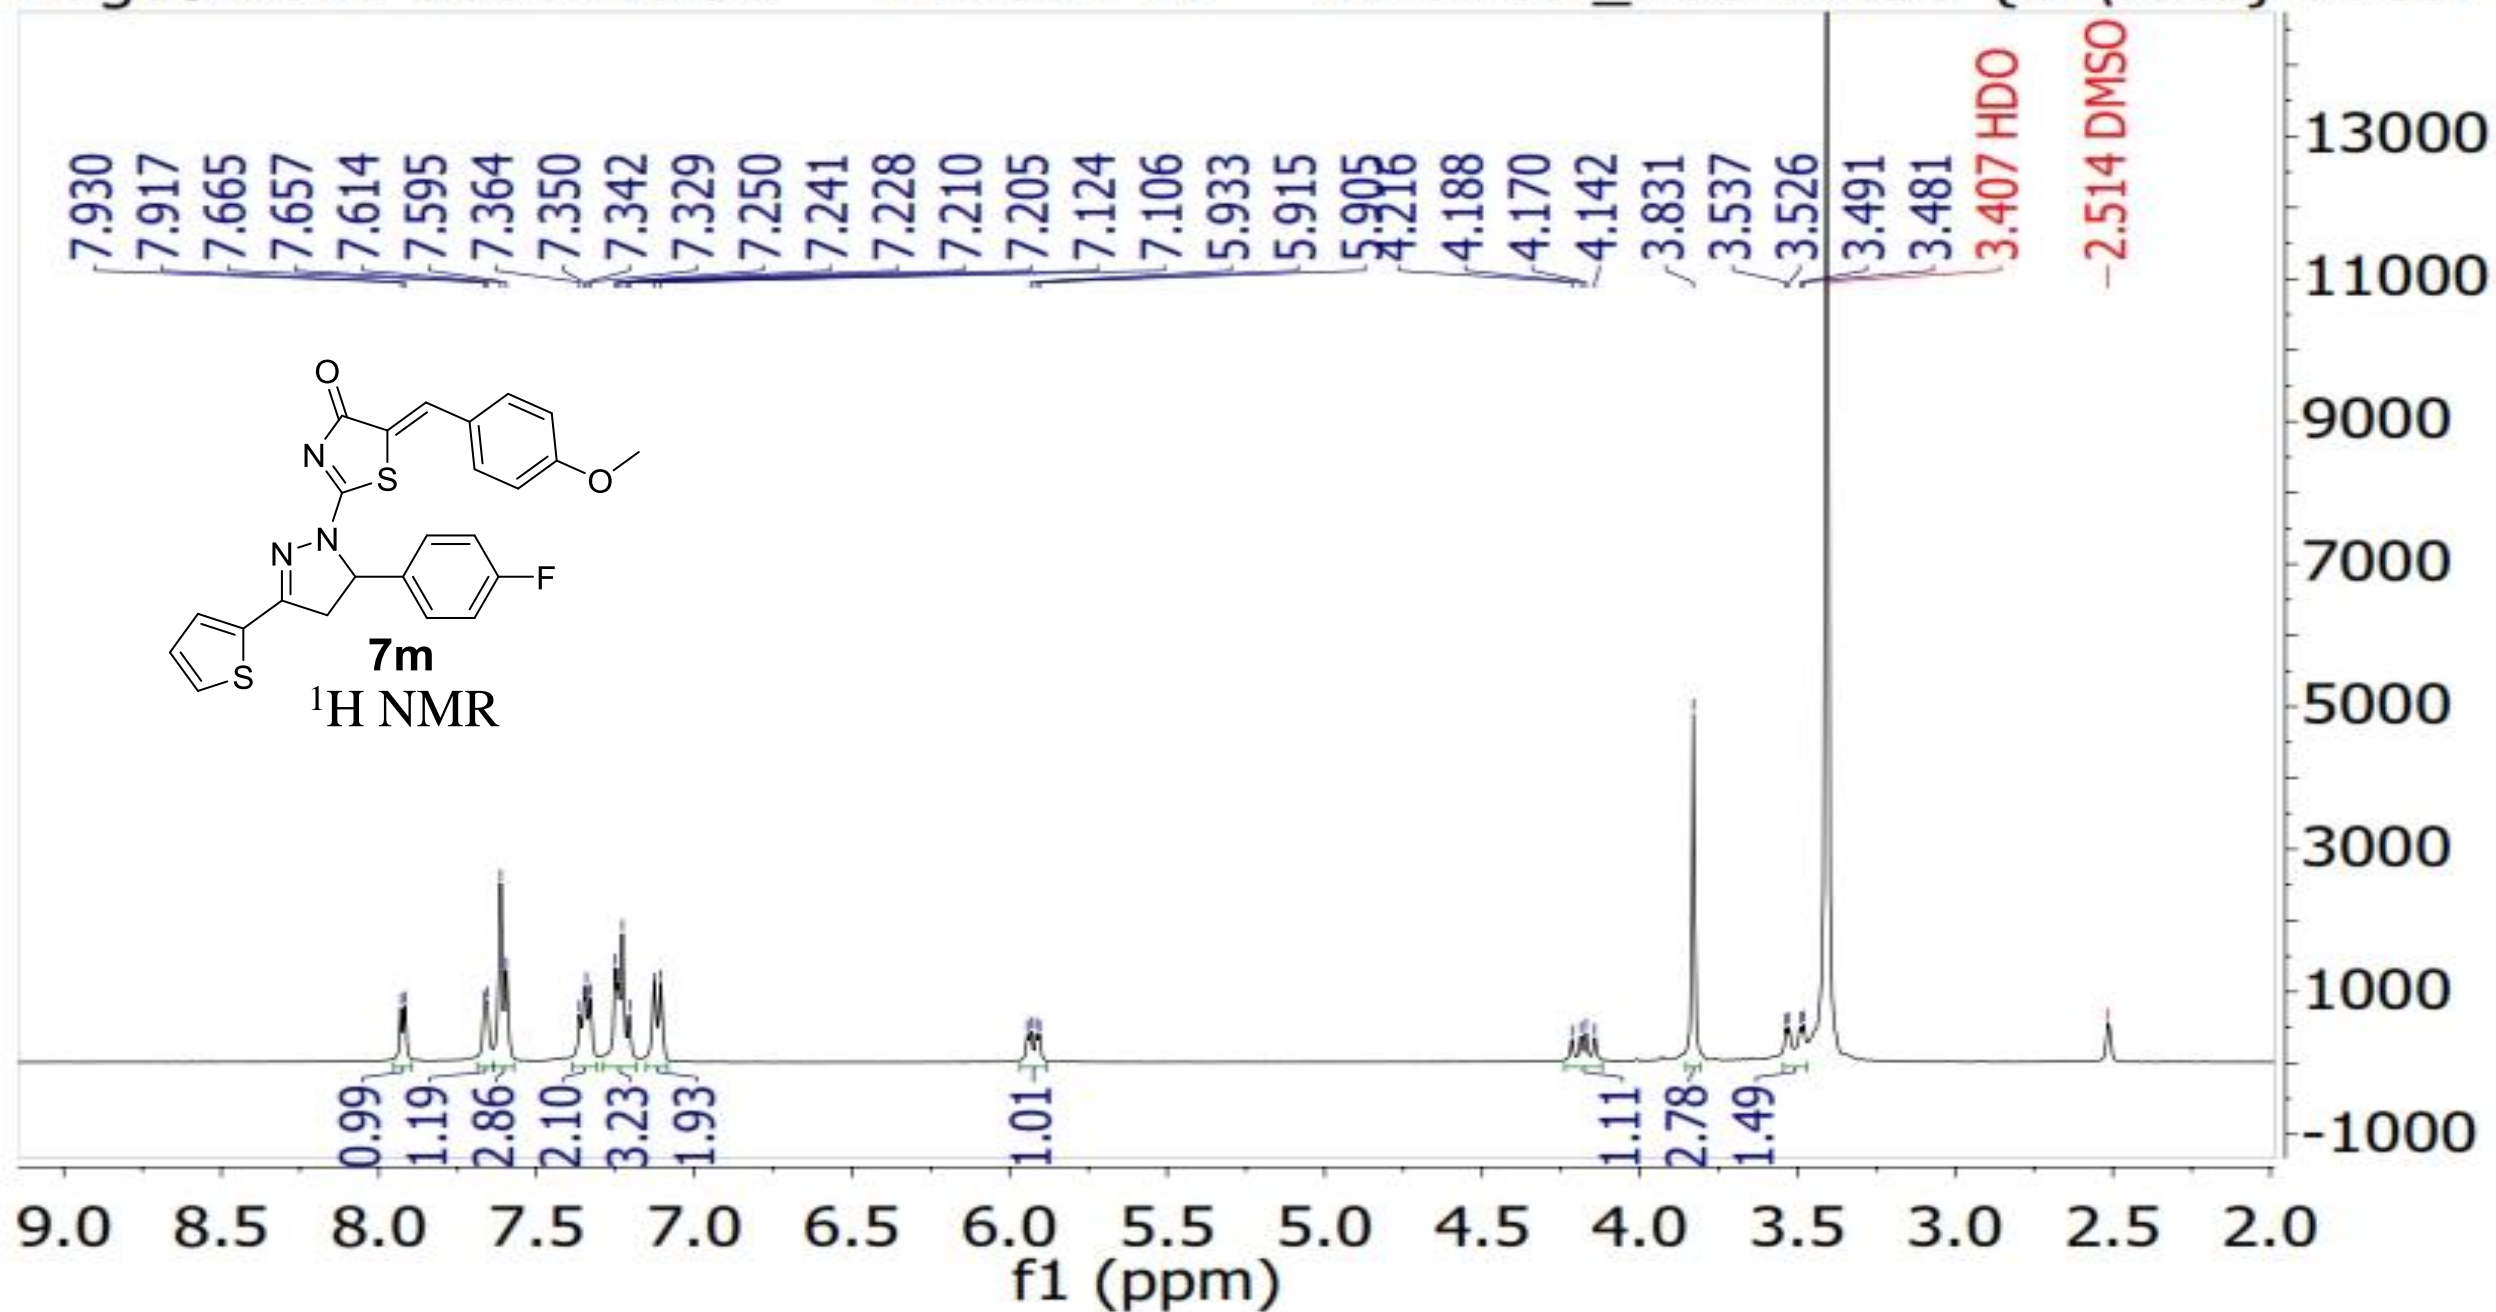

wagdy-N  
PROTON\_BSU DMSO (C:\data) aber 22

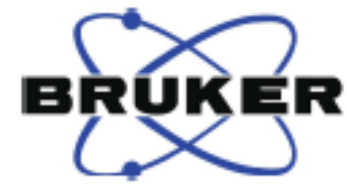

Current Data Parameters  
NAME Aug09-2021-abear  
EXPNO 200  
PROCNO 1

F2 - Acquisition Parameters  
Date\_ 20210809  
Time 11.33  
INSTRUM spect  
PROBHD 5 mm PABBO BB/  
PULPROG zg30  
TD 65536  
SOLVENT DMSO  
NS 16  
DS 2  
SWH 8012.820 Hz  
FIDRES 0.122266 Hz  
AQ 4.0894465 sec  
RG 147.93  
DW 62.400 usec  
DE 6.50 usec  
TE 299.0 K  
D1 1.0000000 sec  
TDO 1

===== CHANNEL f1 =====  
SFO1 400.1324710 MHz  
NUC1 1H  
P1 10.00 usec  
PLW1 16.0000000 W

F2 - Processing parameters  
SI 65536  
SF 400.1300000 MHz  
WDW EM  
SSB 0  
LB 0.10 Hz  
GB 0  
PC 1.00

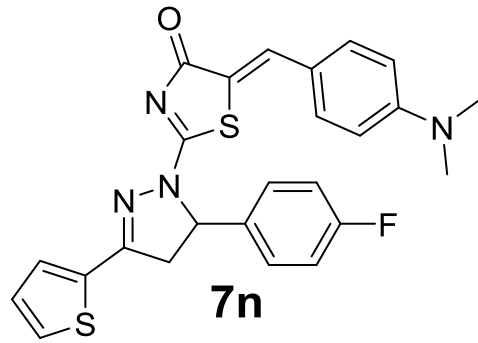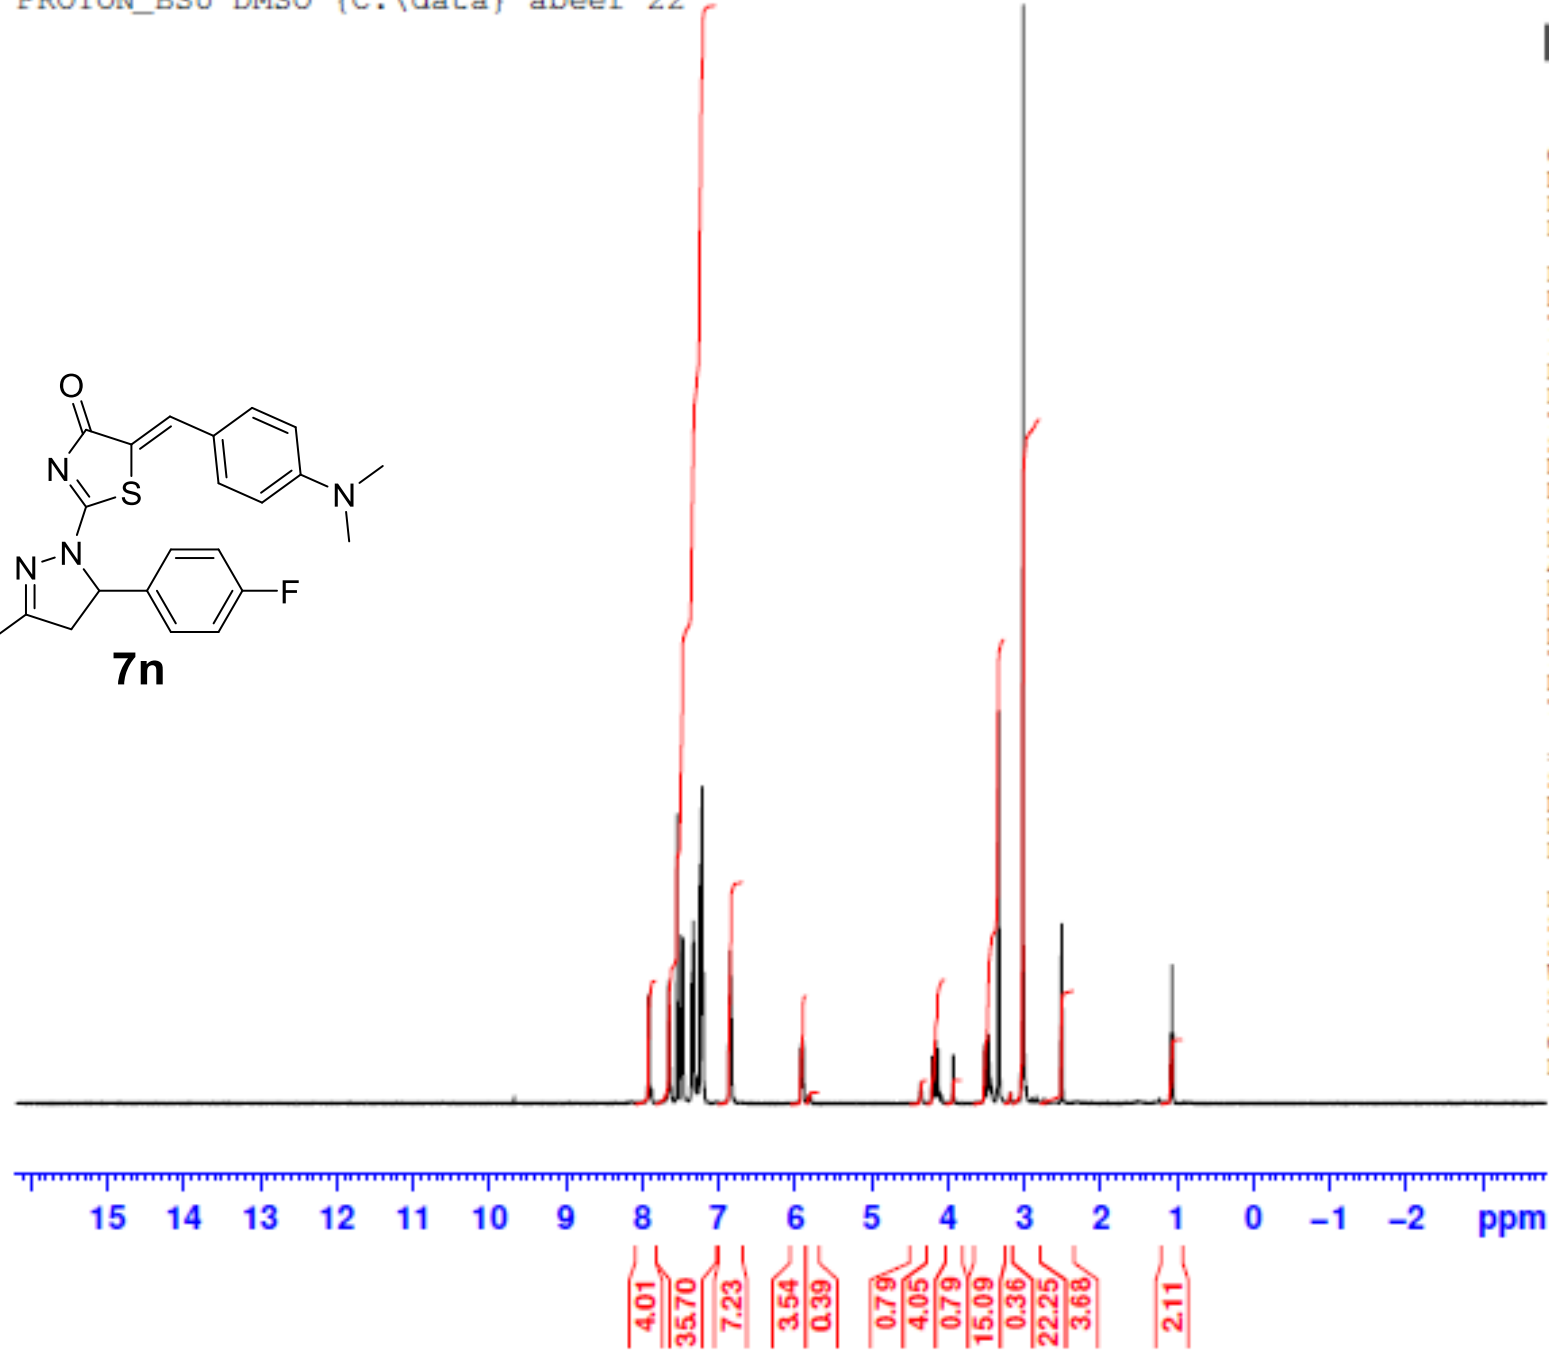

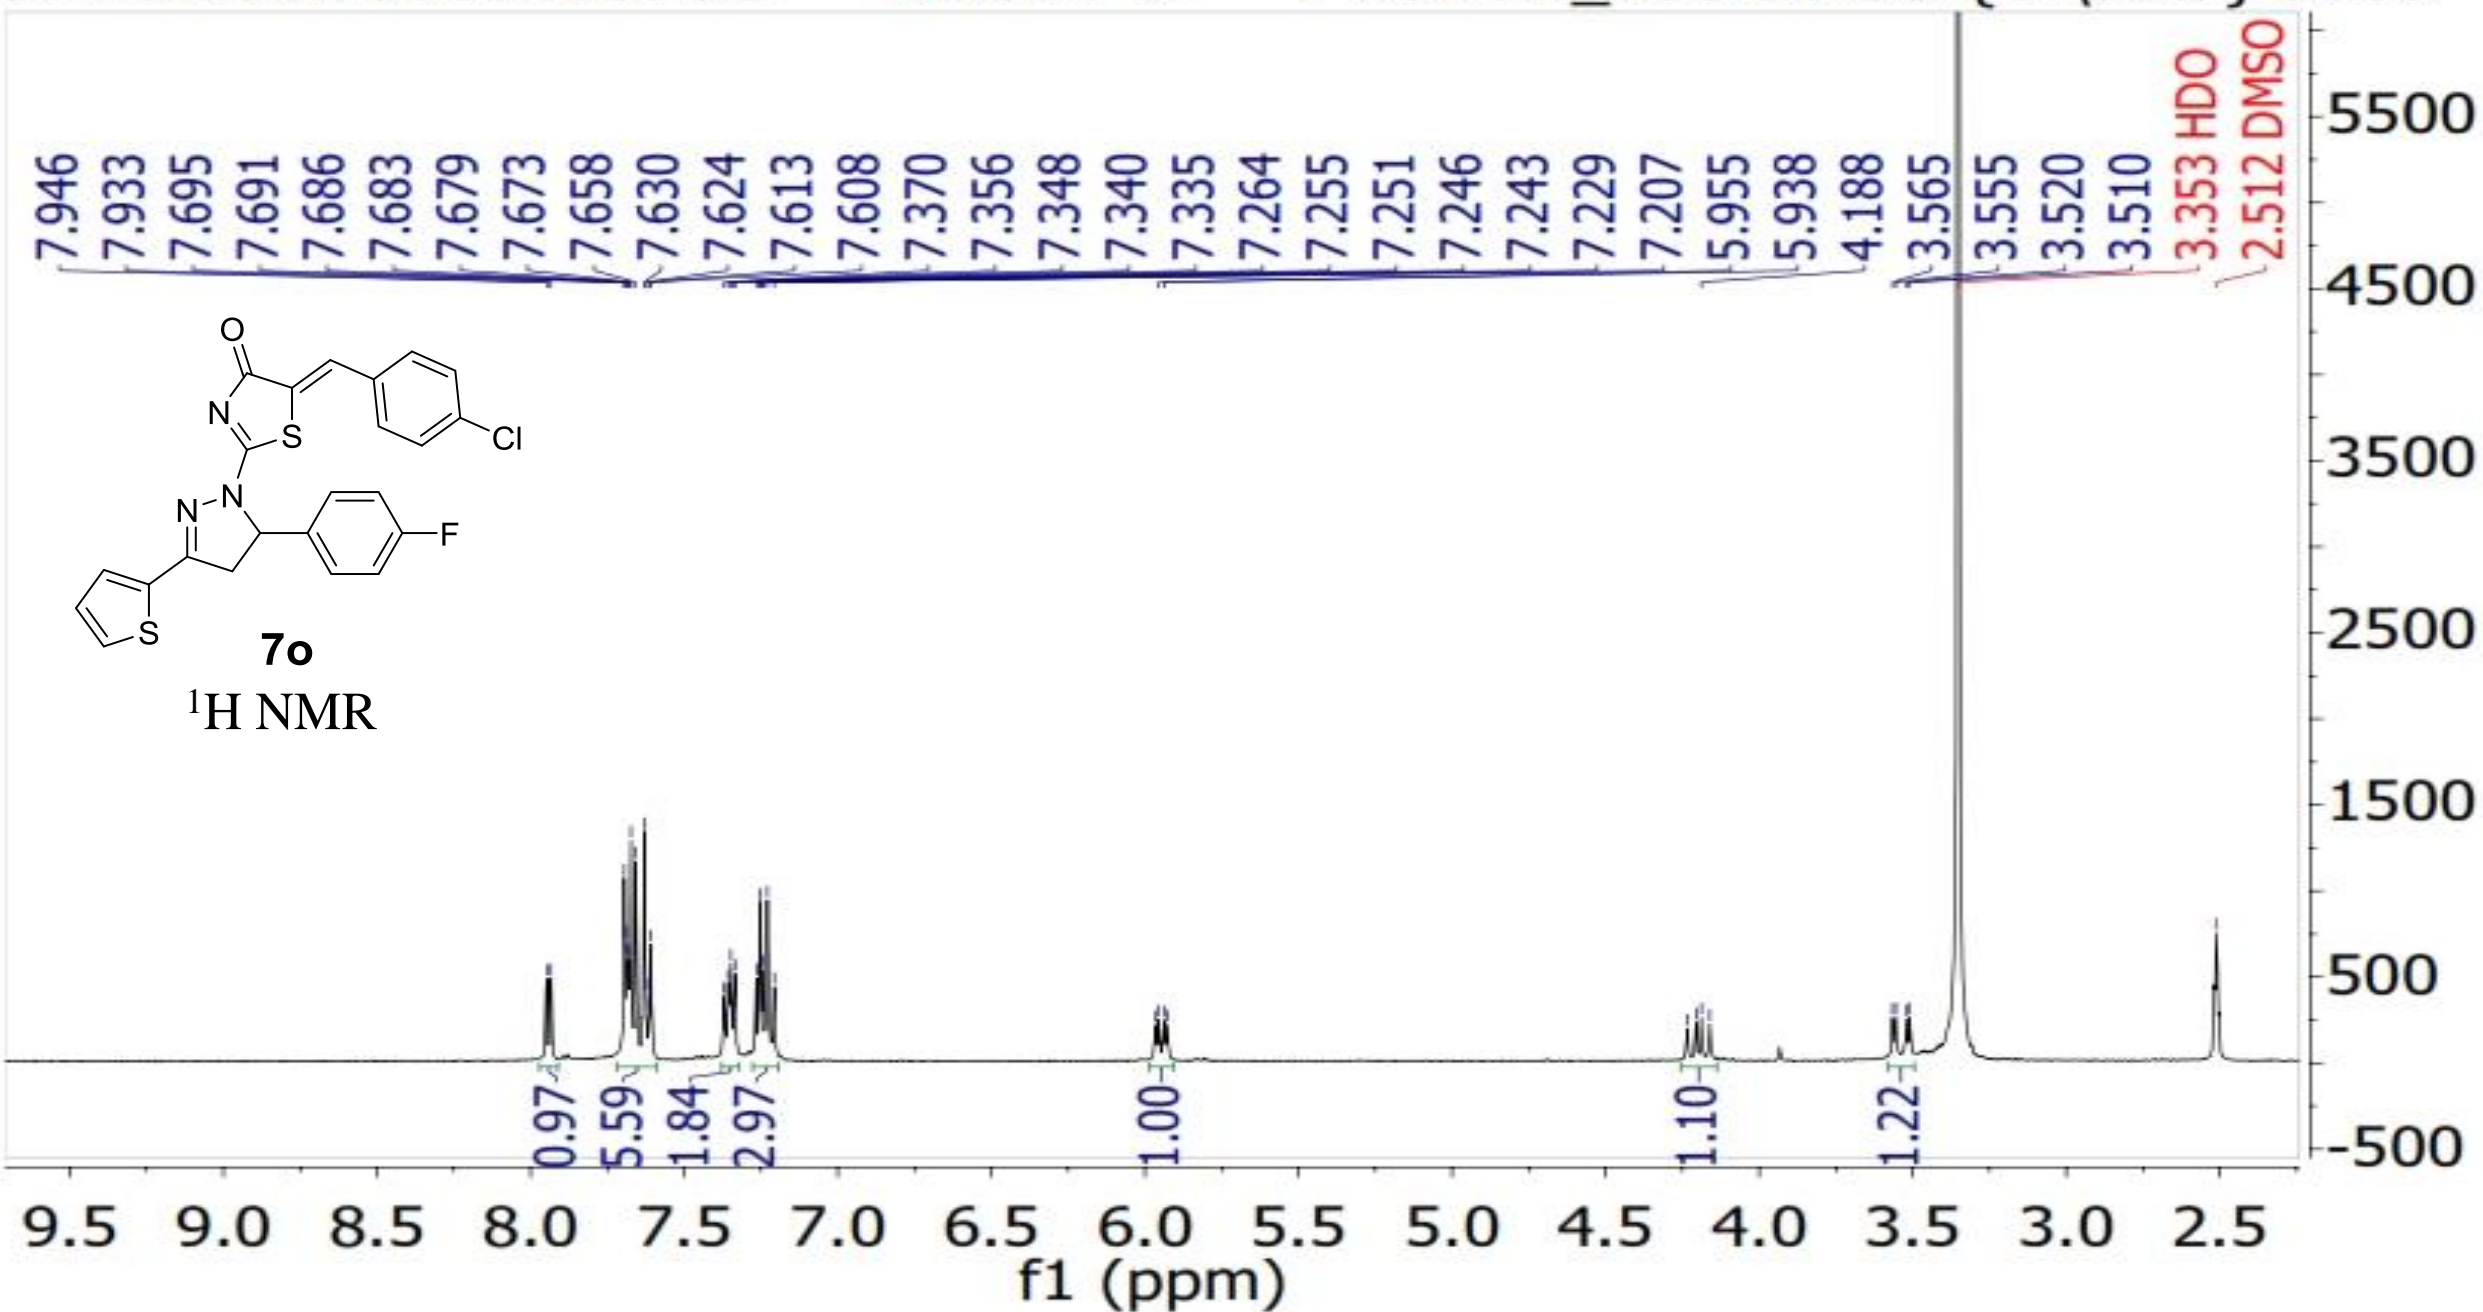

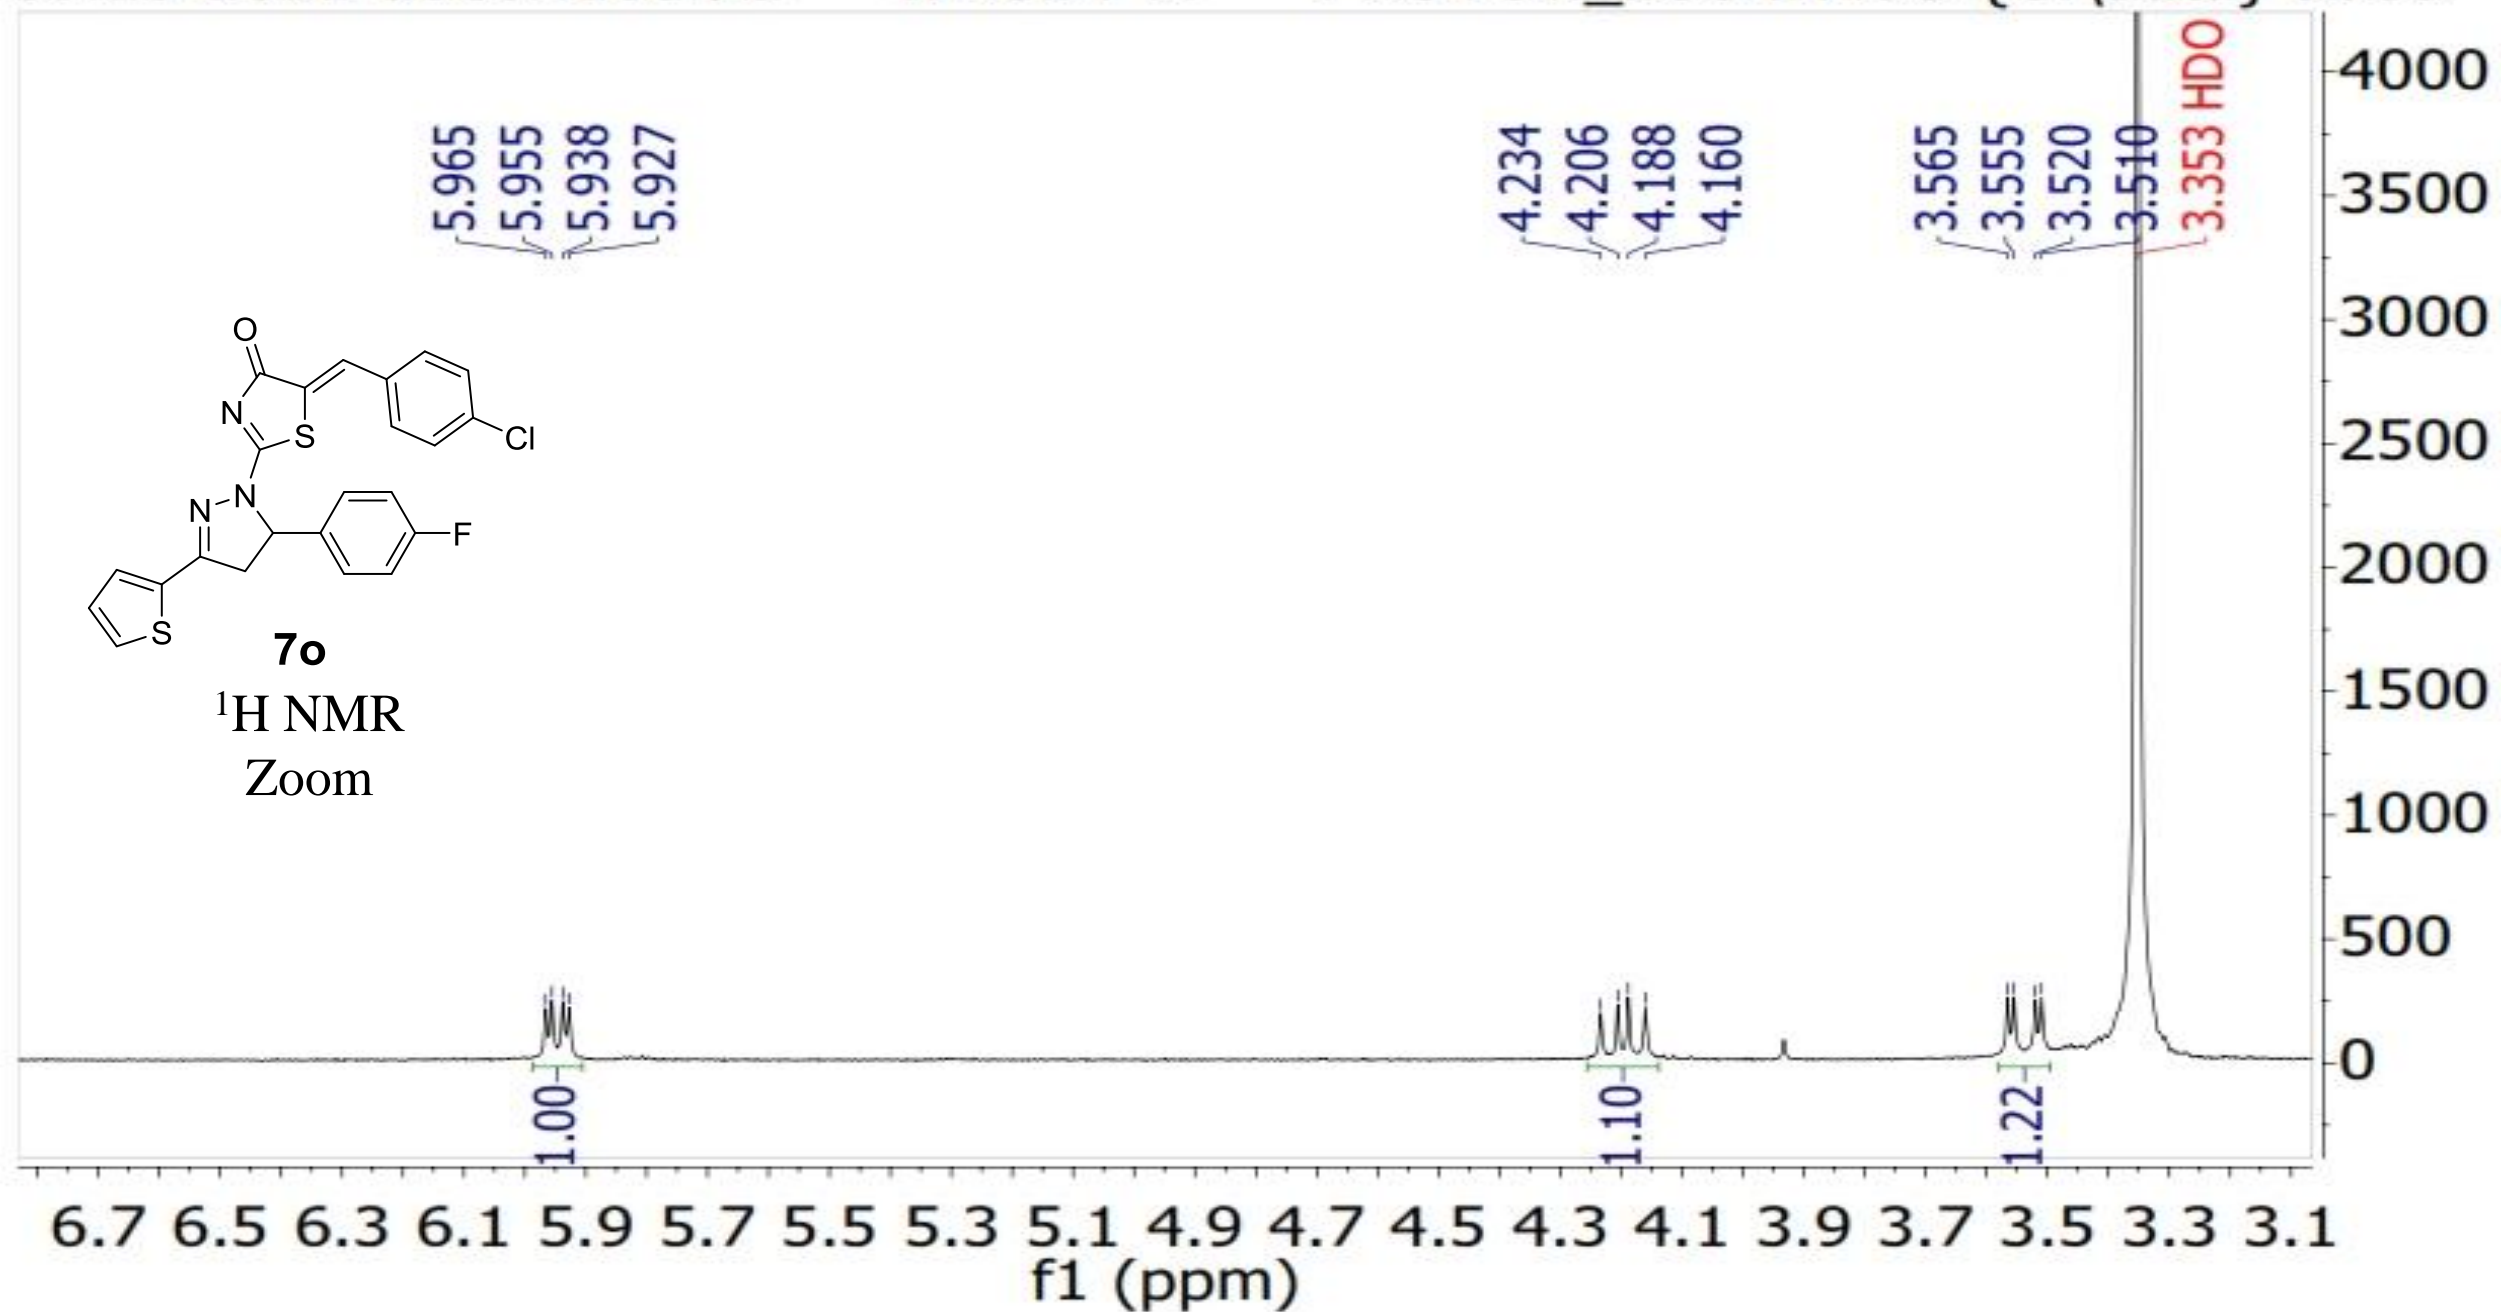



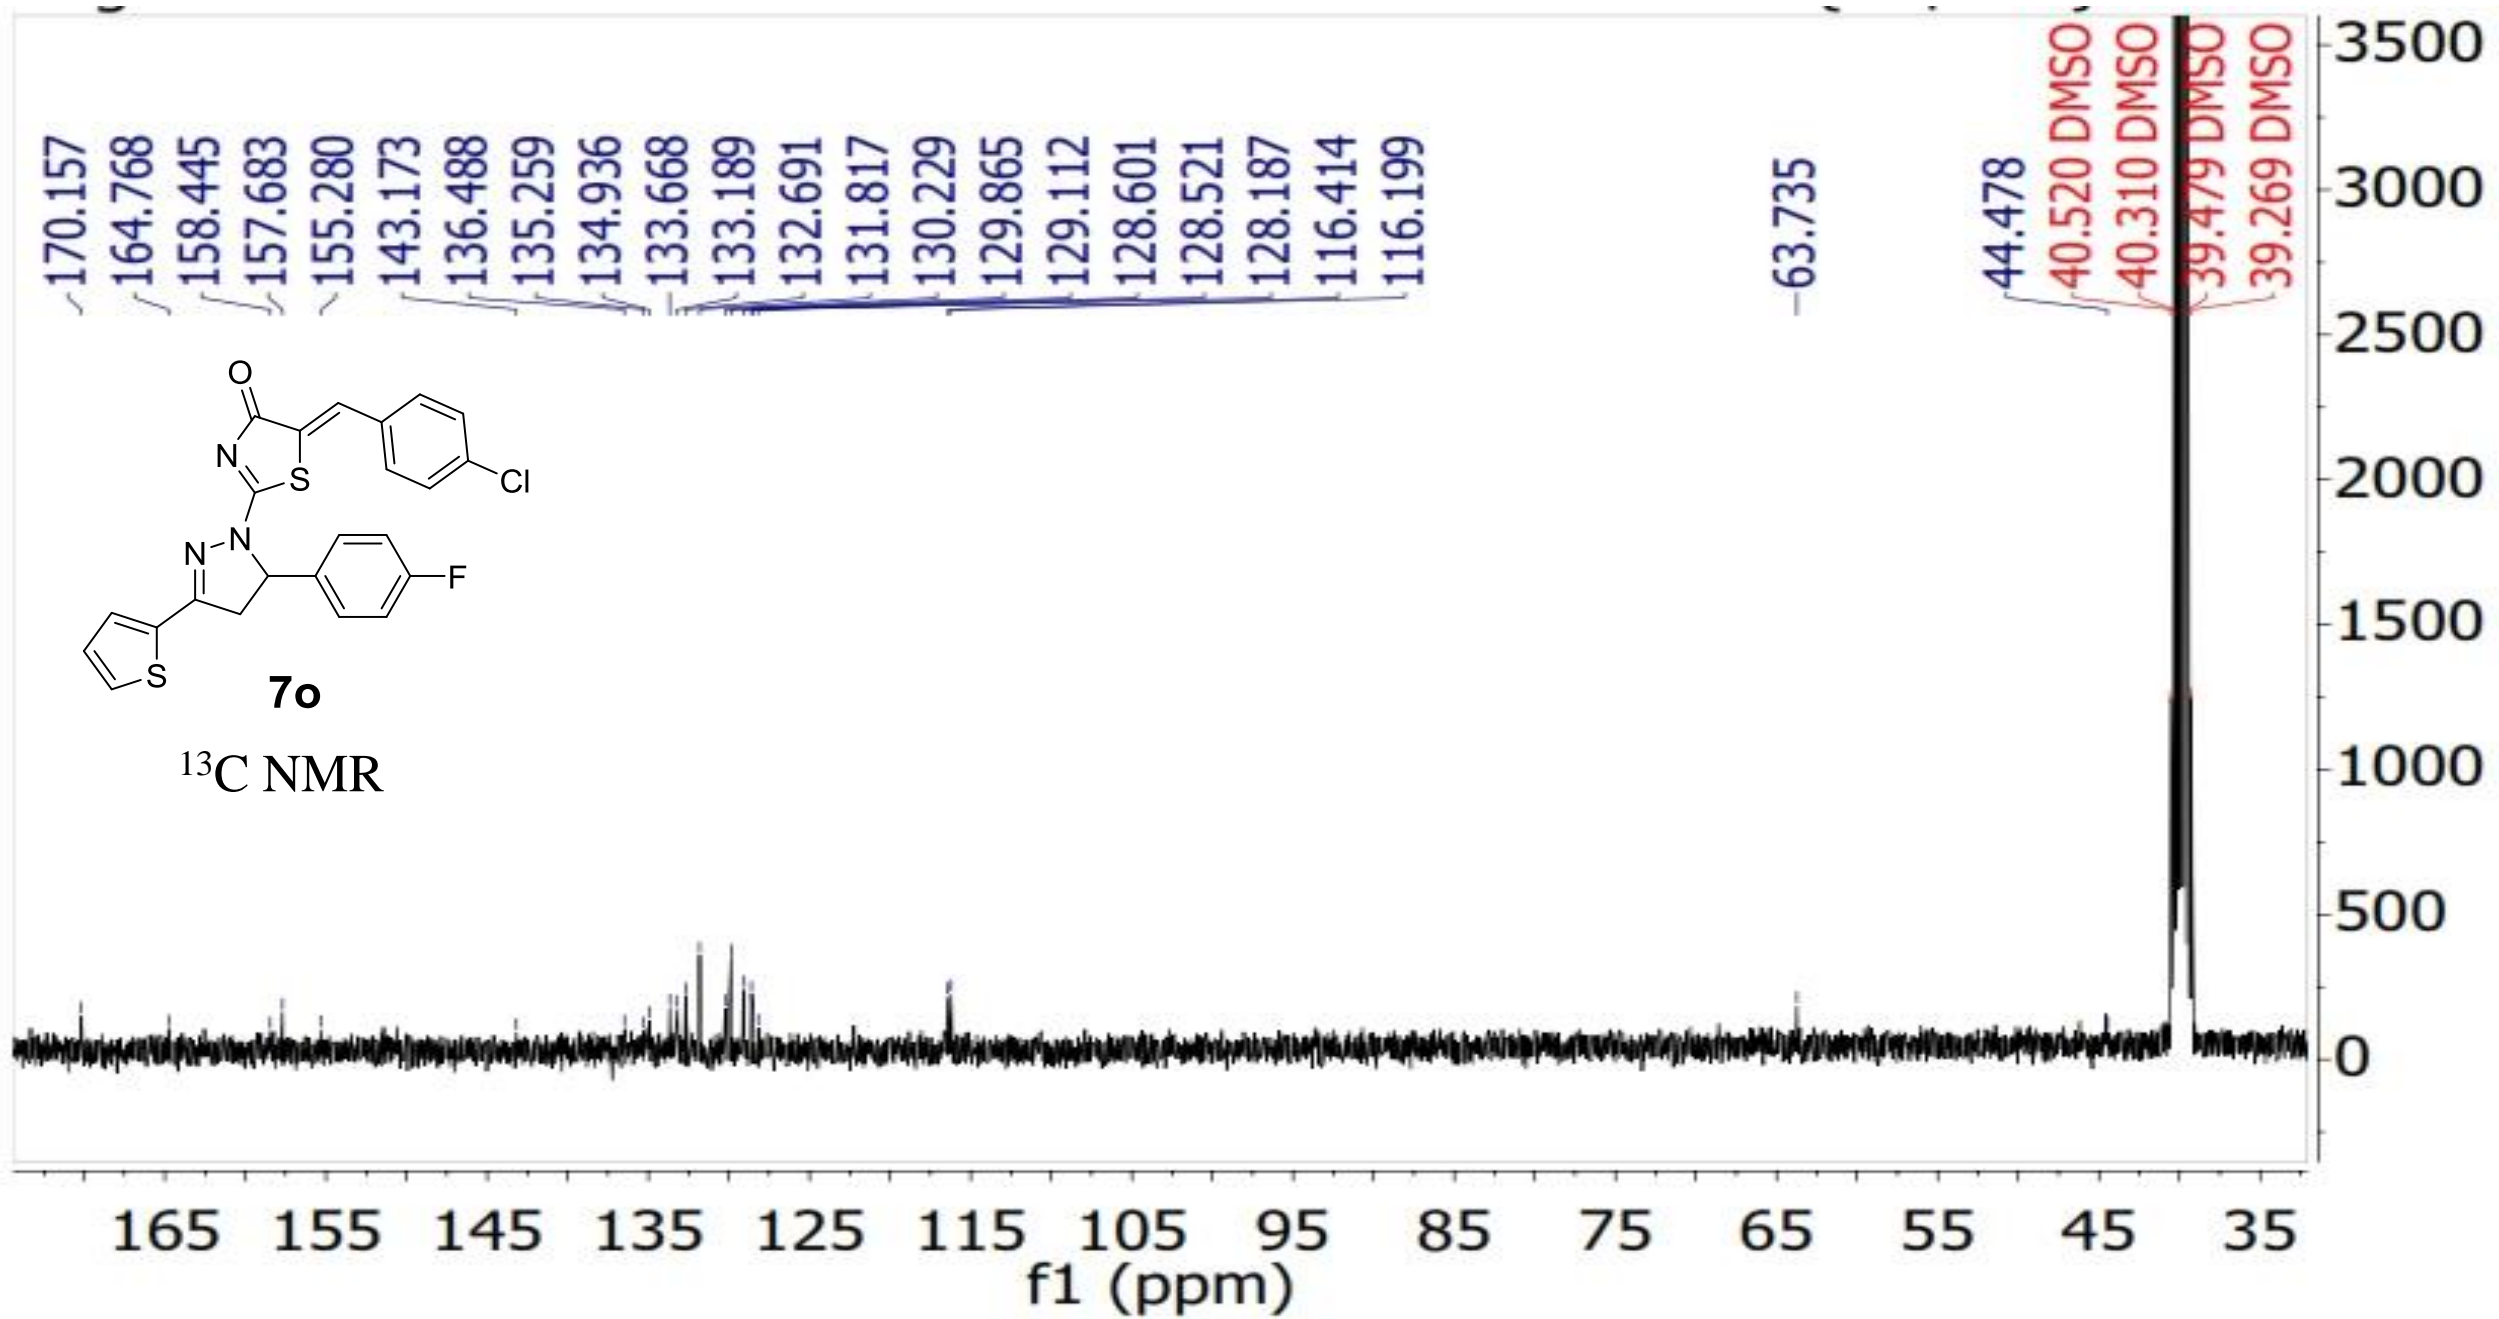

Supplement: Supplementary file 1 [file get_supplementary_file.php]
